# Supplementary material for: Cyclic peptides target the aromatic cage of a PHD-finger reader domain to modulate epigenetic protein function
Source: Chem Sci. 2023 Apr 17;14(26):7136–46. doi: 10.1039/d2sc05944d (PMC10321576; doi:10.1039/d2sc05944d)
Supplement: SC-014-D2SC05944D-s002 [file SC-014-D2SC05944D-s002.xlsx]

## Sheet: DD_StateData
			Mean Relative Deuterium Uptake (Da)																				SD Relative Deuterium Uptake (Da)
			DMSO					H3K4Me3					OC3					OC9					DMSO					H3K4Me3					OC3					OC9
Row Labels	Start	End	1	5	15	30	60	1	5	15	30	60	1	5	15	30	60	1	5	15	30	60	1	5	15	30	60	1	5	15	30	60	1	5	15	30	60	1	5	15	30	60
ASVPVYCL	2	9	2.08756	2.95503	3.42725	3.50172	3.52386	1.47572	2.07072	2.55418	2.93253	3.27347	1.41993	1.961	2.43721	2.73436	2.94529	1.18709	1.58937	1.8432	2.03041	2.11637	0.096711	0.027755	0.085202	0.024119	0.059116	0.032935	0.053015	0.024897	0.023537	0.037185	0.093501	0.044639	0.046321	0.085216	0.093623	0.054079	0.06095	0.071303	0.031582	0.027842
LCRLPYDVTRF	9	19	4.33563	4.17494	4.40192	4.53963	4.67614	4.04638	4.02815	4.14197	4.21022	4.37249	3.85208	4.06118	4.22441	4.37589	4.57281	2.72115	3.12789	3.43096	3.74332	3.95328	0.037406	0.038565	0.065199	0.03444	0.057999	0.040445	0.035255	0.063731	0.037517	0.060529	0.035875	0.05719	0.048579	0.072538	0.048666	0.060971	0.114676	0.082421	0.096486	0.071621
CRLPYDVTRF	10	19	4.08031	3.93001	4.13875	4.26457	4.38366	3.93384	3.78678	3.88505	3.94752	4.10703	3.79331	3.87259	3.9923	4.12373	4.29641	2.7778	3.11748	3.38024	3.64937	3.78676	0.022479	0.02581	0.05332	0.014164	0.044444	0.025645	0.018607	0.050203	0.019125	0.045209	0.014019	0.042785	0.036728	0.054855	0.034973	0.025102	0.103125	0.055018	0.069516	0.039129
MCQDWFHGSC	25	34	1.19292	1.45959	1.5626	1.69289	1.73795	1.14647	1.37945	1.5596	1.64196	1.76166	1.10872	1.44033	1.59628	1.70979	1.80262	0.928211	1.25386	1.37162	1.56394	1.62354	0.189288	0.143984	0.115393	0.0892	0.085221	0.119306	0.058482	0.091107	0.044329	0.09206	0.16726	0.124297	0.104883	0.112509	0.104184	0.090454	0.124349	0.10271	0.098393	0.069376
CQDWFHGSC	26	34	1.1046	1.30317	1.36451	1.49844	1.5783	1.08565	1.27836	1.43433	1.5109	1.56031	1.01018	1.32436	1.441	1.50941	1.50618	0.901284	1.21268	1.32815	1.48587	1.5279	0.15303	0.119593	0.105788	0.043813	0.045776	0.127932	0.04632	0.059347	0.028852	0.0496	0.15847	0.086341	0.071761	0.067469	0.056837	0.05526	0.091095	0.077107	0.060924	0.059092
DWFHGSC	28	34	0.778878	0.958209	1.00457	1.09443	1.15791	0.816886	0.917555	1.06623	1.1099	1.16012	0.708697	0.967858	1.05066	1.0859	1.13399	0.63859	0.890639	0.999275	1.09925	1.18235	0.094711	0.092977	0.076551	0.023615	0.037951	0.111507	0.052991	0.039495	0.012157	0.027342	0.119312	0.075613	0.063731	0.050337	0.053199	0.037226	0.078914	0.061163	0.034359	0.046734
WFHGSCVG	29	36	1.28763	1.3437	1.3781	1.44242	1.4778	1.27679	1.31447	1.38775	1.40846	1.43211	1.24876	1.346	1.40199	1.42944	1.43555	1.19179	1.28672	1.32477	1.40305	1.39525	0.081266	0.07018	0.065663	0.030403	0.041492	0.065326	0.03652	0.036278	0.01659	0.045965	0.085697	0.056394	0.044192	0.060067	0.059326	0.07395	0.090545	0.083355	0.090291	0.087732
FHGSCVG	30	36	1.39042	1.4395	1.47477	1.53325	1.58848	1.39094	1.41389	1.5063	1.51205	1.52994	1.3568	1.44243	1.50475	1.53136	1.55075	1.29367	1.38558	1.42287	1.49816	1.48505	0.087926	0.080822	0.066342	0.043685	0.025098	0.090197	0.044807	0.072289	0.045392	0.050365	0.095469	0.060595	0.05913	0.067163	0.046888	0.040147	0.080459	0.036669	0.048749	0.040953
VGVEEEKAAD	35	44	4.17207	3.91378	3.97083	4.03895	4.16712	4.0496	3.85196	3.91348	3.87784	3.99708	3.67366	3.72573	3.81875	3.96706	4.12976	3.50177	3.59528	3.71763	3.88073	3.97253	0.071522	0.039336	0.072475	0.048504	0.042816	0.059751	0.058265	0.062981	0.047312	0.054894	0.160466	0.061258	0.038159	0.095165	0.036023	0.03113	0.064925	0.032999	0.09979	0.027287
VEEEKAAD	37	44	3.52564	3.19461	3.18887	3.17365	3.18313	3.41918	3.17692	3.18036	3.12908	3.15857	3.03216	2.9536	3.02986	3.17657	3.33752	2.82747	2.86949	3.00893	3.17283	3.21699	0.027662	0.016351	0.053102	0.031406	0.058178	0.031805	0.034189	0.060882	0.01848	0.060902	0.06819	0.067587	0.037134	0.052141	0.020083	0.050204	0.058524	0.030677	0.038366	0.028462
YHCPNCE	48	54	0.651007	0.905818	0.928756	0.97076	1.01286	0.620038	0.839192	0.901147	0.936882	0.943537	0.651317	0.90599	0.938284	0.903427	0.846267	0.513713	0.821952	0.891217	0.917276	0.933918	0.105674	0.08861	0.069642	0.061637	0.06282	0.105905	0.074778	0.076187	0.071666	0.087313	0.10483	0.061306	0.063689	0.06486	0.088442	0.068867	0.064271	0.062397	0.057237	0.075807
EVLHGPSIM	54	62	3.06413	2.77009	2.76442	2.77351	2.77518	3.01388	2.79042	2.7958	2.73894	2.77364	2.58533	2.6145	2.7096	2.81625	2.90748	3.07453	2.78758	2.75384	2.79977	2.79724	0.042654	0.039444	0.053186	0.052432	0.069973	0.029932	0.048223	0.053179	0.03409	0.071751	0.055787	0.054663	0.038154	0.073153	0.041082	0.030651	0.04314	0.031152	0.063832	0.035791
KKRRGSSKGHDTHKGKPVKTGSPTF	63	87	4.58186	4.07295	4.05136	4.05969	4.05597	4.50492	3.91711	3.91639	3.91752	3.93611	4.56426	4.03988	3.99278	4.03898	4.20035	4.61396	4.10228	4.02043	4.08407	4.1085	0.033657	0.05148	0.061275	0.045844	0.073303	0.053623	0.045078	0.035562	0.045895	0.102021	0.072106	0.08087	0.057222	0.096758	0.023127	0.06107	0.061451	0.074566	0.104772	0.042425
VRELRSRTFDSSD	88	100	4.52717	4.26056	4.3367	4.3339	4.37143	4.60356	4.28323	4.35245	4.29158	4.34729	4.45059	4.21128	4.2876	4.42442	4.59125	4.54025	4.26603	4.29906	4.41324	4.39203	0.031221	0.02846	0.109244	0.057981	0.088723	0.032736	0.049607	0.110571	0.030657	0.101495	0.020511	0.09888	0.059119	0.086802	0.044801	0.041078	0.087777	0.042271	0.073028	0.031196
VRELRSRTFDSSDE	88	101	4.48446	4.22522	4.30429	4.30232	4.33404	4.55215	4.25521	4.33328	4.25869	4.31326	4.38882	4.17809	4.23956	4.38427	4.54771	4.48928	4.23512	4.2694	4.36296	4.35831	0.059996	0.058194	0.112639	0.100602	0.096052	0.050312	0.062099	0.111292	0.059425	0.102554	0.04563	0.102648	0.077043	0.106041	0.075243	0.056875	0.088304	0.06857	0.104714	0.060412
LRSRTFDSSD	91	100	3.41713	2.95737	2.94097	2.94237	2.96092	3.39462	2.90996	2.91919	2.84249	2.90284	3.40219	2.92627	2.89523	2.98919	3.14058	3.42241	2.92972	2.88484	2.99187	2.96541	0.040104	0.041654	0.106109	0.064087	0.097881	0.053588	0.081215	0.116893	0.080972	0.118557	0.041322	0.100433	0.055163	0.083282	0.044678	0.044088	0.100555	0.071208	0.077204	0.05823
EVILKPTGNQ	101	110	3.20998	3.08122	3.12483	3.12298	3.2982	3.23662	3.11531	3.13856	3.18755	3.32044	3.18993	3.05049	3.07952	3.18767	3.32405	3.26622	3.11497	3.1135	3.20712	3.29937	0.022881	0.052878	0.065018	0.048973	0.068214	0.048138	0.036447	0.068439	0.039453	0.050023	0.026455	0.052394	0.052186	0.06512	0.043993	0.04924	0.050344	0.067096	0.051554	0.057975
EVILKPTGNQL	101	111	3.41576	3.53272	3.78642	3.87302	4.05481	3.4314	3.55083	3.79279	3.9104	4.04816	3.36172	3.50832	3.76626	3.90794	4.06961	3.40804	3.52054	3.75081	3.90006	4.01758	0.031854	0.069214	0.074112	0.066605	0.054124	0.040778	0.063219	0.087277	0.068696	0.066985	0.031722	0.071502	0.078856	0.071548	0.059529	0.04504	0.05361	0.050434	0.063574	0.059654
EVILKPTGNQLT	101	112	3.72887	3.76992	4.1232	4.25391	4.5731	3.79791	3.88352	4.15748	4.31495	4.54952	3.62378	3.7109	4.00979	4.27844	4.53315	3.7311	3.77719	4.11206	4.3212	4.53879	0.061672	0.05136	0.070239	0.036923	0.047395	0.069605	0.045907	0.082091	0.041673	0.026672	0.043632	0.065253	0.078347	0.070815	0.038674	0.06439	0.062987	0.063334	0.065417	0.06615
VILKPTGNQL	102	111	3.39915	3.50011	3.72823	3.76864	3.84413	3.4205	3.51641	3.74068	3.80276	3.83806	3.37447	3.50662	3.7245	3.80489	3.87708	3.42127	3.50241	3.68568	3.82216	3.8383	0.031522	0.035873	0.062051	0.039343	0.033398	0.030479	0.036358	0.051614	0.031615	0.042457	0.029308	0.050341	0.040459	0.037689	0.038978	0.038507	0.041999	0.038191	0.033347	0.03611
ILKPTGNQ	103	110	2.857	2.92335	3.09761	3.12813	3.19799	2.872	2.92832	3.09682	3.15075	3.18464	2.82714	2.91731	3.075	3.16764	3.21399	2.87616	2.92322	3.06766	3.17239	3.18143	0.013761	0.02104	0.019784	0.018916	0.018148	0.012708	0.017424	0.039841	0.019333	0.01878	0.019177	0.021915	0.02452	0.029707	0.02738	0.032056	0.029618	0.030079	0.028749	0.024265
KPTGNQL	105	111	2.67161	2.80003	2.98592	3.01356	3.06378	2.69608	2.80066	2.98621	3.01642	3.0453	2.66871	2.78079	2.97277	3.03528	3.10689	2.69974	2.80058	2.97507	3.05266	3.05678	0.043215	0.02677	0.037078	0.031136	0.038527	0.028025	0.02716	0.048404	0.022534	0.034595	0.041209	0.043442	0.038797	0.042356	0.037768	0.029867	0.04701	0.031993	0.040008	0.037674
NSFSVPIL	119	126	1.52965	1.65511	1.94678	2.04488	2.12379	1.52091	1.66769	1.95527	2.07166	2.11307	1.47368	1.62729	1.91572	2.05184	2.0945	1.50301	1.64738	1.9324	2.06765	2.09905	0.013485	0.006948	0.007101	0.015338	0.007316	0.005107	0.014678	0.015651	0.011969	0.010248	0.011149	0.009384	0.013626	0.017029	0.010463	0.012174	0.011333	0.016226	0.017399	0.015642
FSVPILVL	121	128	1.14615	1.2691	1.54028	1.624	1.68343	1.14447	1.26135	1.53404	1.65092	1.68439	1.0696	1.23732	1.51619	1.60876	1.66691	1.13275	1.27908	1.54234	1.64183	1.67687	0.024001	0.023651	0.03283	0.031463	0.033637	0.009262	0.015412	0.01999	0.012141	0.026656	0.016389	0.025279	0.047042	0.038432	0.02043	0.009903	0.025986	0.033122	0.027126	0.024745
SVPILVL	122	128	0.970014	0.890557	0.875126	0.870608	0.883537	0.94676	0.856478	0.871163	0.861836	0.885523	0.863046	0.811014	0.802413	0.773474	0.814956	0.936459	0.875598	0.870556	0.840972	0.853388	0.032561	0.032794	0.033701	0.032951	0.033372	0.026814	0.026667	0.031846	0.030083	0.034708	0.01082	0.011521	0.010061	0.037647	0.013365	0.005179	0.012162	0.011785	0.007246	0.021243
VLKKDGLG	127	134	2.94877	2.7927	2.78912	2.7747	2.80639	2.93573	2.77867	2.7929	2.75744	2.77876	2.94638	2.77877	2.76437	2.84082	2.92671	2.96438	2.78626	2.76853	2.84091	2.80934	0.059312	0.058575	0.076416	0.061976	0.069764	0.059688	0.060915	0.078333	0.046258	0.076057	0.065832	0.075403	0.064331	0.074186	0.05772	0.062212	0.069466	0.056661	0.058607	0.051135
VLKKDGLGMTLPSPSF	127	142	5.91338	5.67017	5.72163	5.71321	5.75739	5.8968	5.66631	5.72642	5.6817	5.73254	5.79232	5.61519	5.66116	5.75205	5.92647	5.88703	5.66285	5.65889	5.75136	5.72871	0.051132	0.063321	0.107044	0.063363	0.084967	0.047845	0.044351	0.099764	0.045005	0.094015	0.050106	0.088005	0.073692	0.087135	0.064345	0.0383	0.079341	0.049775	0.067708	0.03904
KKDGLGMTLPSPSF	129	142	4.95344	4.76545	4.8149	4.7915	4.84154	4.95048	4.76143	4.81835	4.78312	4.82731	4.8704	4.7256	4.75988	4.83494	4.96196	4.95304	4.79338	4.80065	4.85339	4.85799	0.036994	0.042925	0.070785	0.047869	0.064903	0.04337	0.041689	0.070769	0.036375	0.064627	0.038735	0.058868	0.044923	0.068768	0.043406	0.042002	0.060883	0.051781	0.072494	0.048497
MTLPSPSF	135	142	2.96476	2.6628	2.66851	2.66207	2.67539	2.95462	2.6485	2.65822	2.63977	2.6674	2.97337	2.6966	2.68176	2.69802	2.78148	2.95633	2.66405	2.64156	2.66748	2.67009	0.019913	0.02538	0.027949	0.020726	0.030707	0.019901	0.01992	0.030334	0.02036	0.030993	0.013939	0.016136	0.015597	0.033463	0.012458	0.017675	0.02119	0.01717	0.030401	0.016962
TVRDVEHYVGSD	143	154	2.17452	2.17289	2.56953	2.76663	3.01249	2.19144	2.22967	2.61779	2.83895	3.02536	2.14047	2.14996	2.47162	2.75485	2.97509	2.20432	2.21321	2.58744	2.87383	3.06326	0.033261	0.023118	0.026527	0.040693	0.047119	0.016863	0.028718	0.035255	0.021995	0.058012	0.021158	0.025785	0.033253	0.039439	0.030238	0.023864	0.025441	0.019768	0.028339	0.02896
TVRDVEHYVGSDKE	143	156	2.58992	2.70392	3.21745	3.45136	3.71953	2.61072	2.76351	3.27102	3.53189	3.72406	2.5846	2.70746	3.13711	3.44525	3.66147	2.61211	2.75673	3.24226	3.57128	3.7501	0.039561	0.040934	0.067224	0.042484	0.048291	0.045596	0.041815	0.062599	0.040579	0.054666	0.03597	0.042295	0.057397	0.042411	0.054926	0.049227	0.053322	0.048977	0.040353	0.041853
TVRDVEHYVGSDKEID	143	158	2.74095	2.96753	3.57856	3.84044	4.13831	2.77762	3.05431	3.64557	3.93357	4.15444	2.6838	2.89289	3.42889	3.81168	4.06216	2.75976	3.02198	3.61469	3.96456	4.18219	0.043566	0.045545	0.074522	0.059749	0.066786	0.052306	0.049558	0.082084	0.058662	0.068048	0.047218	0.066988	0.078181	0.069185	0.072133	0.06078	0.067103	0.068044	0.066345	0.065909
TVRDVEHYVGSDKEIDV	143	159	2.7731	3.01183	3.65041	3.96371	4.38075	2.80036	3.10263	3.76953	4.0842	4.42947	2.68922	2.87015	3.4012	3.79922	4.07794	2.7839	3.07098	3.68468	4.14634	4.42478	0.040815	0.004767	0.046495	0.030806	0.057107	0.03788	0.020477	0.082414	0.030615	0.032012	0.023054	0.038265	0.055568	0.049578	0.072667	0.044025	0.064407	0.058714	0.029606	0.034488
VEHYVGSDKEID	147	158	1.70799	1.92477	2.36849	2.57753	2.73103	1.73043	2.01239	2.46586	2.58101	2.66729	1.66563	1.85583	2.24635	2.50227	2.66074	1.70562	1.98464	2.41682	2.63391	2.67793	0.027018	0.048999	0.042947	0.049309	0.051109	0.020416	0.018894	0.077221	0.019031	0.023401	0.038624	0.02896	0.062376	0.02778	0.031399	0.033618	0.040939	0.038849	0.025516	0.029758
VIDVTRQAD	159	167	3.85054	4.01287	4.10066	4.07644	4.12063	3.93078	4.02371	4.08884	4.08032	4.09155	2.93428	3.36709	3.5953	3.72345	3.86132	3.96727	4.04125	4.08775	4.0945	4.10237	0.010387	0.024767	0.019768	0.033158	0.022998	0.01323	0.024716	0.018887	0.019783	0.018503	0.109529	0.073798	0.029372	0.060209	0.049253	0.025799	0.010633	0.004548	0.022474	0.006515
VIDVTRQADC	159	168	4.2012	4.44601	4.54053	4.47046	4.54917	4.31925	4.48416	4.48964	4.52785	4.51862	3.03017	3.52671	3.87376	4.05138	4.23283	4.35423	4.43642	4.47189	4.51727	4.54334	0.03358	0.014936	0.025827	0.048123	0.027951	0.035001	0.037651	0.03139	0.020249	0.020451	0.125637	0.117324	0.060562	0.050452	0.043188	0.027818	0.03575	0.025983	0.030457	0.041574
IDVTRQADCKM	160	170	4.36304	4.49223	4.60146	4.69344	4.92806	4.45332	4.62011	4.66479	4.78993	4.95684	3.0846	3.71742	4.01394	4.24142	4.45258	4.473	4.5426	4.6654	4.85905	4.93431	0.032737	0.051756	0.029529	0.023532	0.042575	0.037416	0.138303	0.081572	0.050777	0.121498	0.151203	0.113426	0.109658	0.114578	0.075251	0.040526	0.046925	0.049147	0.069983	0.08706
VTRQADC	162	168	2.96703	2.9508	2.93469	2.89396	2.9298	3.03722	2.92913	2.91041	2.91082	2.91157	2.16075	2.53807	2.69737	2.79861	2.88148	3.04173	2.9332	2.91393	2.90049	2.89777	0.034684	0.040489	0.04613	0.046429	0.044195	0.035149	0.037871	0.044384	0.03806	0.036983	0.091436	0.068194	0.049822	0.063257	0.048095	0.049919	0.03939	0.041184	0.044268	0.040925
VTRQADCKMKLGD	162	174	3.59136	3.82833	4.22119	4.38856	4.68218	3.68255	3.88949	4.31461	4.53761	4.72823	2.32721	3.17028	3.7031	4.06432	4.27482	3.7083	3.89473	4.32935	4.58272	4.7518	0.043538	0.050794	0.067446	0.052818	0.053344	0.032564	0.037975	0.070783	0.030587	0.04943	0.137692	0.111986	0.087036	0.08256	0.083606	0.024789	0.041927	0.041927	0.030389	0.036919
TRQADCKMKLGD	163	174	3.33582	3.59221	3.86179	4.04574	4.30001	3.31376	3.58044	3.92056	4.1688	4.3775	2.00543	2.87564	3.35901	3.68218	3.96526	3.37774	3.65307	3.94523	4.25027	4.39398	0.164759	0.056457	0.099757	0.094648	0.026141	0.04048	0.080206	0.053225	0.141101	0.080706	0.080269	0.119561	0.099862	0.103612	0.152417	0.042664	0.109751	0.049847	0.048557	0.039945
KMKLGDF	169	175	1.05585	1.29034	1.57145	1.63176	1.73946	1.10439	1.31676	1.58447	1.67957	1.78515	0.640607	0.982709	1.2941	1.53379	1.6329	1.10816	1.31739	1.58565	1.74483	1.80086	0.029509	0.028536	0.014342	0.042797	0.013884	0.029788	0.032566	0.019982	0.027196	0.054085	0.03871	0.065312	0.067874	0.023102	0.024676	0.033015	0.039518	0.018108	0.065785	0.064988
FVKYYYSGKREKVLNV	175	190	2.46008	2.52619	3.01863	3.38323	3.97867	2.48452	2.64178	3.20255	3.62508	4.12639	2.24899	2.18716	2.40581	2.64825	3.00931	2.46597	2.62521	3.14534	3.67091	4.12075	0.03788	0.044759	0.103918	0.048191	0.059694	0.026896	0.032222	0.102377	0.033559	0.073058	0.039765	0.099813	0.079531	0.130671	0.135558	0.027237	0.077171	0.070532	0.050586	0.043581
KYYYSGKREK	177	186	2.51508	2.46227	2.79352	3.01578	3.29275	2.55023	2.52078	2.92138	3.12311	3.28348	2.35615	2.24584	2.3796	2.56806	2.72668	2.52603	2.50539	2.8562	3.1735	3.3159	0.029719	0.027399	0.082586	0.037822	0.068449	0.042009	0.013028	0.045879	0.034406	0.067958	0.065765	0.094457	0.072827	0.106612	0.062858	0.017229	0.062445	0.053256	0.030577	0.046056
YYSGKREKVLNV	179	190	2.7752	2.72045	3.16837	3.45474	3.87879	2.80037	2.80673	3.29029	3.59191	3.90007	2.58495	2.37944	2.54771	2.78164	3.08158	2.78833	2.79409	3.223	3.65172	3.91222	0.05145	0.052485	0.093625	0.075365	0.08469	0.05331	0.059687	0.111778	0.052639	0.090266	0.054498	0.109997	0.086412	0.149929	0.113483	0.054315	0.087016	0.069701	0.080863	0.061512
YSGKREKVLNV	180	190	2.42776	2.35893	2.74776	3.00955	3.33933	2.46002	2.44024	2.82907	3.10155	3.36778	2.28067	2.13073	2.2781	2.48367	2.72672	2.44101	2.4185	2.78692	3.16873	3.37484	0.034072	0.04811	0.089203	0.048179	0.076607	0.044203	0.037372	0.083923	0.030145	0.086373	0.018075	0.101516	0.072352	0.115358	0.103444	0.043474	0.090497	0.06193	0.062564	0.047937
SGKREKVLNV	181	190	2.30325	2.23798	2.62761	2.81724	3.20383	2.34478	2.30797	2.69124	2.96397	3.21431	2.16048	1.99353	2.13053	2.31784	2.5643	2.31535	2.29079	2.66674	2.99783	3.20184	0.057429	0.059888	0.090441	0.086004	0.090304	0.064189	0.073097	0.09294	0.075269	0.104272	0.077686	0.093491	0.086461	0.140146	0.103053	0.076724	0.092864	0.086219	0.0872	0.100953
LEFSDTRL	193	200	2.31564	2.37717	2.641	2.71789	2.80689	2.27039	2.39884	2.63487	2.72692	2.78328	2.30827	2.3858	2.60254	2.76626	2.90756	2.27856	2.38828	2.57622	2.76313	2.81521	0.058689	0.042302	0.044098	0.048522	0.073671	0.059749	0.042723	0.060403	0.039387	0.079375	0.050553	0.031702	0.031587	0.060971	0.061249	0.067778	0.078376	0.051203	0.055273	0.058233
EFSDTRL	194	200	1.84626	1.87816	2.09014	2.17109	2.24401	1.83674	1.87756	2.09718	2.17621	2.237	1.86196	1.88747	2.08398	2.2309	2.33223	1.85379	1.87761	2.07504	2.2296	2.26065	0.045963	0.040993	0.048384	0.048212	0.0577	0.04919	0.048864	0.053648	0.038159	0.063645	0.046154	0.048725	0.043549	0.054311	0.038334	0.044601	0.049807	0.039972	0.0526	0.042676
EFSDTRLSNL	194	203	2.12852	2.35982	2.86226	3.1554	3.49601	2.08689	2.36949	2.85812	3.16092	3.45438	2.1224	2.37568	2.87199	3.29911	3.60342	2.0955	2.32321	2.78704	3.18904	3.45165	0.067379	0.046063	0.089267	0.060449	0.066227	0.071062	0.043523	0.123602	0.043252	0.058552	0.065524	0.078948	0.072046	0.064365	0.055965	0.049035	0.059091	0.068456	0.061576	0.068136
FSDTRLSNL	195	203	1.63742	1.92754	2.45215	2.71847	3.0764	1.61696	1.93856	2.42699	2.74594	3.04318	1.63091	1.94243	2.46167	2.87947	3.14516	1.63357	1.90075	2.3969	2.78274	3.03944	0.035906	0.035428	0.030712	0.067269	0.040653	0.050284	0.0335	0.041853	0.030043	0.037604	0.039224	0.023764	0.03154	0.064327	0.026828	0.034234	0.020614	0.036848	0.046803	0.019149
VETPKIVRKLSW	204	215	2.30084	2.58717	2.86602	3.05187	3.33763	2.26926	2.52505	2.83365	3.07281	3.27069	2.23802	2.57576	2.8802	3.08318	3.29379	2.25128	2.54768	2.7923	3.04656	3.22303	0.02396	0.059131	0.060312	0.023815	0.042573	0.038557	0.03061	0.050608	0.032851	0.052947	0.037985	0.091267	0.060758	0.064962	0.057235	0.034124	0.084301	0.058414	0.056966	0.064963
VETPKIVRKLSWVE	204	217	3.65314	3.78378	4.02876	4.18924	4.46084	3.61841	3.72849	3.99696	4.21006	4.39583	3.57447	3.74962	4.01593	4.21176	4.42623	3.6036	3.73913	3.94025	4.18413	4.34061	0.04823	0.078515	0.06953	0.026022	0.041747	0.057629	0.049956	0.059722	0.043839	0.054226	0.060679	0.1001	0.068456	0.074581	0.056988	0.055373	0.097051	0.067616	0.070572	0.067587
VETPKIVRKLSWVENL	204	219	4.23372	4.53589	5.00332	5.26386	5.61754	4.17642	4.46663	4.96596	5.28417	5.54892	4.11928	4.51149	4.98296	5.286	5.59466	4.18507	4.52579	4.94258	5.29528	5.52696	0.058599	0.083538	0.084212	0.036746	0.05331	0.060839	0.050761	0.07541	0.043806	0.063108	0.072065	0.121569	0.07902	0.084705	0.070912	0.05573	0.10543	0.075391	0.069405	0.066901
ETPKIVRKLSW	205	215	2.16672	2.4196	2.67463	2.84388	3.10149	2.15106	2.36819	2.65146	2.873	3.03982	2.12403	2.42489	2.6968	2.86736	3.06741	2.13685	2.38468	2.60121	2.83742	2.99854	0.092017	0.126997	0.120881	0.104192	0.11646	0.099548	0.098694	0.129733	0.104227	0.124857	0.09041	0.141628	0.106935	0.125434	0.117305	0.0976	0.134094	0.113161	0.118057	0.128185
PKIVRKLSW	207	215	1.63893	1.81977	2.07593	2.24816	2.48893	1.66543	1.80159	2.11922	2.20913	2.47224	1.54796	1.75513	1.93507	2.08215	2.24581	1.60549	1.83205	2.06796	2.1945	2.3045	0.071874	0.063034	0.027656	0.024378	0.060666	0.074547	0.10619	0.059163	0.035156	0.070255	0.023088	0.068487	0.051401	0.034621	0.061049	0.049591	0.08756	0.080102	0.103813	0.098169
VRKLSWVENL	210	219	2.69832	2.73657	2.97795	3.13875	3.35338	2.63576	2.66691	2.97503	3.11962	3.31593	2.64889	2.72418	3.01672	3.19108	3.38973	2.63111	2.70513	2.8987	3.1903	3.30707	0.098961	0.107474	0.083999	0.08575	0.086207	0.08508	0.096187	0.101766	0.068191	0.068617	0.094373	0.119395	0.091317	0.11337	0.087697	0.090128	0.127624	0.050128	0.091036	0.085146
VENLWPEE	216	223	1.78569	1.97246	2.32782	2.46372	2.57082	1.732	1.93534	2.30819	2.4646	2.56505	1.76933	1.99197	2.331	2.51061	2.63413	1.73374	1.91278	2.25603	2.42024	2.51859	0.082693	0.092966	0.112067	0.11538	0.118519	0.085077	0.085871	0.111599	0.106221	0.11543	0.064796	0.092505	0.105156	0.115351	0.114749	0.078889	0.094069	0.082861	0.078052	0.075689
VENLWPEEC	216	224	2.36677	2.47478	2.83915	2.98518	3.08181	2.34868	2.46796	2.85465	2.9846	3.08726	2.33316	2.4961	2.8082	3.01485	3.16044	2.36509	2.49969	2.84273	2.99215	3.08914	0.043963	0.043098	0.069169	0.045146	0.097243	0.034011	0.061051	0.064437	0.034573	0.073503	0.039521	0.058236	0.051249	0.056988	0.075888	0.056124	0.036806	0.038423	0.094065	0.07392
VENLWPEECV	216	225	3.08945	3.03506	3.32972	3.45908	3.54761	3.04699	3.00279	3.33106	3.44683	3.5533	3.04763	3.07288	3.33821	3.52074	3.69784	3.05758	3.05634	3.31498	3.50202	3.56621	0.094545	0.09129	0.112917	0.088284	0.098643	0.094279	0.088103	0.114188	0.090034	0.099907	0.099818	0.12092	0.10382	0.111201	0.112062	0.067506	0.104015	0.093046	0.110105	0.107064
NLWPEEC	218	224	1.48382	1.5262	1.66064	1.67052	1.71345	1.4599	1.47017	1.63483	1.67145	1.68715	1.48386	1.50382	1.62291	1.68096	1.73097	1.45852	1.48805	1.61647	1.66514	1.66517	0.035863	0.029177	0.037329	0.018632	0.026675	0.028058	0.033205	0.037946	0.02841	0.042751	0.046122	0.05403	0.027989	0.03513	0.024547	0.045505	0.055775	0.054348	0.0465	0.052951
CVFERPNVQKYCL	224	236	3.64036	3.57107	3.66262	3.74042	3.92788	3.61889	3.56528	3.6755	3.80435	3.94906	3.58411	3.53372	3.61544	3.76765	3.96062	3.60054	3.57659	3.64485	3.81358	3.93575	0.080259	0.066756	0.070645	0.03497	0.023498	0.043422	0.062798	0.080013	0.049033	0.024495	0.055023	0.089772	0.071139	0.053766	0.065508	0.059571	0.076357	0.070844	0.047048	0.041547
VFERPNVQKYCL	225	236	3.25679	3.18953	3.28297	3.36568	3.53608	3.22933	3.17922	3.28858	3.40537	3.54785	3.24417	3.18196	3.27139	3.40252	3.55204	3.21618	3.18093	3.26184	3.40951	3.536	0.040356	0.050173	0.056423	0.028664	0.038945	0.047237	0.049719	0.063157	0.042182	0.056115	0.040584	0.052114	0.047397	0.035119	0.045753	0.048658	0.059763	0.048653	0.047508	0.053821
FERPNVQKYCL	226	236	2.61414	2.57323	2.70229	2.74993	2.89185	2.5885	2.57677	2.70767	2.79414	2.88928	2.61115	2.5859	2.69567	2.79816	2.91045	2.61977	2.58887	2.69745	2.80694	2.89295	0.076576	0.097797	0.039885	0.040633	0.038884	0.073683	0.072112	0.028454	0.027909	0.032144	0.063021	0.05702	0.021744	0.025216	0.028009	0.047197	0.052835	0.019226	0.025202	0.028945
ERPNVQKYCL	227	236	2.797	2.72893	2.84567	2.90278	3.08753	2.7758	2.71829	2.89405	2.98353	3.10134	2.8268	2.76036	2.86372	2.93995	3.11693	2.76344	2.73817	2.83153	3.00296	3.07215	0.040969	0.051653	0.026321	0.029886	0.039849	0.016343	0.027171	0.036708	0.028244	0.073617	0.035524	0.029021	0.026801	0.048526	0.040674	0.037862	0.044273	0.052776	0.067222	0.045685
RPNVQKYCL	228	236	1.04415	1.05497	1.05527	1.0659	1.08506	1.05132	1.05397	1.05803	1.06138	1.08034	1.0434	1.04849	1.04676	1.07315	1.07923	1.05425	1.05987	1.06805	1.07686	1.09075	0.019678	0.018967	0.018659	0.025864	0.03256	0.017462	0.014072	0.014003	0.0233	0.020252	0.014787	0.014035	0.023244	0.013818	0.013553	0.022427	0.018347	0.019593	0.02829	0.031201
MSVRDSYTDF	237	246	0.791782	0.960768	1.27312	1.49707	1.93502	0.844098	1.06788	1.41777	1.74344	2.04949	0.754609	0.866958	1.13732	1.423	1.76949	0.833615	1.02872	1.36489	1.69083	1.98722	0.024307	0.022866	0.034915	0.048803	0.021575	0.025158	0.026523	0.037666	0.028927	0.026266	0.021031	0.033691	0.042921	0.036422	0.035082	0.034384	0.034423	0.040232	0.036832	0.038935
SVRDSYTDF	238	246	0.872468	0.984614	1.2369	1.39139	1.68416	0.923432	1.07455	1.35408	1.5705	1.76387	0.840743	0.914347	1.12828	1.37082	1.62383	0.915603	1.04706	1.30559	1.53398	1.71565	0.029765	0.022667	0.050993	0.016982	0.013552	0.032351	0.039193	0.051487	0.034414	0.020622	0.018776	0.040583	0.060605	0.033762	0.041669	0.035912	0.041826	0.050698	0.036237	0.031784
RDSYTDF	240	246	0.667666	0.760506	0.931077	1.02906	1.16033	0.691958	0.821569	0.989213	1.10675	1.17891	0.607234	0.660367	0.796178	0.912981	1.02663	0.690422	0.799942	0.967968	1.09737	1.16305	0.011057	0.00592	0.01449	0.014159	0.010572	0.012046	0.011293	0.017962	0.011023	0.015136	0.016153	0.024093	0.028081	0.027889	0.01844	0.02	0.016499	0.02169	0.013552	0.015225
HIDFGGTSV	247	255	1.29193	1.42355	1.49825	1.5601	1.59794	1.31914	1.42555	1.52011	1.54408	1.57358	1.28527	1.43492	1.50463	1.57676	1.63352	1.32029	1.44145	1.49102	1.57348	1.56532	0.031909	0.024068	0.051081	0.022171	0.041102	0.034737	0.02043	0.040523	0.026771	0.030524	0.025864	0.051221	0.039463	0.038677	0.020536	0.029459	0.052182	0.034012	0.041409	0.026081
HIDFGGTSVW	247	256	1.19027	1.30803	1.37663	1.42352	1.46918	1.21076	1.31907	1.39089	1.40747	1.44285	1.15877	1.30673	1.37099	1.43543	1.48545	1.20368	1.32439	1.36711	1.42993	1.43579	0.044154	0.035799	0.060329	0.038417	0.038605	0.03471	0.032402	0.049652	0.030172	0.03638	0.03552	0.058438	0.049446	0.043512	0.039195	0.034467	0.054109	0.04299	0.040867	0.033871
HIDFGGTSVWY	247	257	1.13032	1.24006	1.29204	1.31905	1.32931	1.13701	1.23552	1.29217	1.29892	1.31197	1.11208	1.24398	1.28531	1.31891	1.37199	1.14017	1.25578	1.28305	1.32725	1.30893	0.020692	0.019709	0.036366	0.033519	0.046537	0.022225	0.020889	0.026152	0.024807	0.041757	0.020204	0.033288	0.023576	0.032523	0.033506	0.026154	0.031994	0.022949	0.038752	0.04404
WYHVLKGEKIF	256	266	0.544499	0.483168	0.549913	0.586995	0.613193	0.574718	0.520853	0.562604	0.584297	0.625073	0.691432	0.589607	0.580219	0.635368	0.732801	0.508704	0.466459	0.477923	0.54187	0.564561	0.033742	0.033772	0.032316	0.033947	0.051794	0.034435	0.036349	0.02782	0.028197	0.038609	0.030434	0.041199	0.030609	0.0306	0.031296	0.047001	0.04734	0.045749	0.049907	0.053603
WYHVLKGEKIFY	256	267	0.570679	0.525227	0.55337	0.582504	0.651441	0.577529	0.535236	0.571705	0.614757	0.672059	0.544827	0.505076	0.541521	0.587693	0.664315	0.561351	0.514231	0.542148	0.591741	0.647035	0.033981	0.034024	0.033638	0.034856	0.037452	0.030099	0.031783	0.029246	0.03134	0.03278	0.036219	0.035028	0.034204	0.034173	0.038023	0.030651	0.032546	0.026046	0.036295	0.030804
YHVLKGEKIFY	257	267	0.496794	0.456757	0.48592	0.507991	0.58795	0.49922	0.459231	0.490957	0.528532	0.596857	0.502099	0.456009	0.483678	0.540089	0.618891	0.500913	0.455356	0.475141	0.525091	0.581863	0.035892	0.035956	0.04052	0.037708	0.035153	0.045859	0.045151	0.045423	0.046212	0.045653	0.026878	0.029795	0.030717	0.024426	0.02819	0.038415	0.039475	0.03714	0.036679	0.039534
HVLKGEKIFY	258	267	0.519617	0.47619	0.500094	0.536884	0.608908	0.522086	0.484001	0.516313	0.560987	0.613116	0.534449	0.481008	0.52595	0.578326	0.658122	0.521613	0.479591	0.498921	0.545272	0.603222	0.036798	0.036951	0.041042	0.043755	0.039128	0.032777	0.022094	0.017924	0.029037	0.041677	0.049526	0.048257	0.03657	0.047799	0.04966	0.035748	0.039235	0.038515	0.045166	0.041817
LIRPTNA	268	274	1.29809	1.09935	1.12351	1.15601	1.24895	1.28832	1.10082	1.13764	1.15297	1.24161	1.31308	1.10921	1.12358	1.21887	1.35972	1.32075	1.11999	1.13163	1.21836	1.27376	0.049276	0.051592	0.063995	0.060093	0.056801	0.049582	0.05409	0.063606	0.043508	0.05027	0.039992	0.059089	0.056098	0.052709	0.051921	0.048038	0.060704	0.048273	0.04335	0.043764
LIRPTNAN	268	275	1.64348	1.6664	1.82473	1.84693	1.96118	1.62939	1.67567	1.82568	1.83854	1.94801	1.63854	1.66138	1.79817	1.91883	2.05742	1.65881	1.6783	1.818	1.9071	1.97633	0.045114	0.047099	0.058882	0.057576	0.042628	0.047026	0.048547	0.059719	0.044969	0.044532	0.04526	0.05145	0.049442	0.060732	0.043143	0.047455	0.050479	0.044755	0.062086	0.042105
LIRPTNANL	268	276	1.40111	1.49625	1.68863	1.73772	1.88213	1.38907	1.54955	1.71782	1.75915	1.89038	1.36745	1.51113	1.67454	1.81334	1.96003	1.37473	1.50168	1.6863	1.78355	1.88909	0.038432	0.024521	0.050906	0.040067	0.022785	0.024691	0.015874	0.049866	0.02673	0.028867	0.025227	0.044523	0.045346	0.030058	0.029252	0.026732	0.051959	0.028925	0.046807	0.020158
LIRPTNANLTL	268	278	1.41292	1.80233	2.24553	2.3891	2.64606	1.43939	1.90071	2.29736	2.45207	2.67176	1.39399	1.80845	2.22831	2.48867	2.72642	1.40433	1.81353	2.24817	2.47023	2.65358	0.014842	0.019432	0.04345	0.027511	0.023614	0.027933	0.016455	0.044177	0.021423	0.032418	0.028269	0.039274	0.047892	0.045939	0.033274	0.01778	0.036441	0.025262	0.035345	0.019207
WSSSSNQ	282	288	2.41834	2.21363	2.22038	2.20247	2.21111	2.43013	2.18895	2.20302	2.16973	2.18766	2.43002	2.22017	2.19502	2.25416	2.32253	2.42388	2.21683	2.20277	2.23163	2.22449	0.029884	0.017902	0.040962	0.026909	0.039318	0.016534	0.029161	0.039381	0.010057	0.036246	0.005274	0.035593	0.015507	0.054797	0.025539	0.026407	0.023356	0.015484	0.032533	0.019912
WSSSSNQNEM	282	291	3.86767	3.59626	3.5842	3.59655	3.60295	3.85891	3.47632	3.58512	3.48029	3.53808	3.84055	3.52418	3.52936	3.61077	3.70302	3.82214	3.51183	3.53492	3.54675	3.48939	0.011721	0.032152	0.065422	0.072591	0.070411	0.059291	0.045911	0.040167	0.041691	0.058433	0.029507	0.051991	0.062069	0.076081	0.048686	0.056102	0.084257	0.050926	0.071715	0.040128
WSSSSNQNEMF	282	292	4.26018	3.93058	3.92607	3.91115	3.95138	4.23927	3.89543	3.89357	3.87958	3.91942	4.1918	3.85771	3.83213	3.88891	4.00422	4.22803	3.89344	3.85513	3.90663	3.91344	0.016599	0.032954	0.0722	0.025193	0.04002	0.006207	0.033799	0.065401	0.011257	0.059044	0.017794	0.047824	0.026107	0.064052	0.040929	0.024691	0.03932	0.029769	0.037518	0.037618
SSSSNQNEM	283	291	3.75695	3.35857	3.43068	3.4372	3.42005	3.75454	3.35332	3.37628	3.37039	3.39527	3.827	3.38663	3.32596	3.43239	3.53072	3.78647	3.38931	3.34316	3.42797	3.38883	0.065364	0.043186	0.030803	0.071775	0.039963	0.025995	0.032611	0.039478	0.033528	0.049507	0.019523	0.020744	0.025367	0.062179	0.019636	0.064471	0.039096	0.017079	0.025233	0.021856
SSSSNQNEMF	283	292	3.89128	3.53376	3.52718	3.53013	3.55154	3.86223	3.48785	3.49998	3.46555	3.5004	3.88633	3.53114	3.51412	3.5577	3.67112	3.86759	3.52543	3.49147	3.53372	3.535	0.012614	0.039406	0.056367	0.029952	0.046256	0.021673	0.030008	0.054075	0.021675	0.050177	0.026431	0.046738	0.022229	0.062703	0.028803	0.022516	0.044343	0.019607	0.047122	0.018965
FFGDQVDKC	292	300	2.11497	2.20807	2.35575	2.39166	2.56718	2.14793	2.24889	2.38474	2.47279	2.63717	2.11813	2.19184	2.32096	2.37441	2.48156	2.14264	2.22562	2.37501	2.46627	2.5834	0.024277	0.023654	0.016198	0.048358	0.023051	0.033268	0.025073	0.029005	0.038799	0.035581	0.032623	0.018613	0.019281	0.038103	0.036007	0.02871	0.027344	0.026605	0.037251	0.030864
FFGDQVDKCY	292	301	1.58288	1.60375	1.60333	1.61748	1.61628	1.59218	1.58483	1.59865	1.59147	1.6027	1.60717	1.58965	1.5894	1.60159	1.63491	1.61588	1.62446	1.63781	1.62703	1.62535	0.081224	0.077534	0.071002	0.079661	0.094185	0.096501	0.110374	0.12566	0.119822	0.124831	0.112765	0.084301	0.085654	0.144119	0.124196	0.117105	0.103471	0.153534	0.122068	0.105157
FGDQVDKC	293	300	1.9261	2.0302	2.16856	2.22267	2.37921	1.9541	2.06055	2.18956	2.29912	2.43901	1.93512	2.03474	2.14391	2.18608	2.29151	1.95268	2.05331	2.1831	2.28414	2.4027	0.065834	0.058123	0.058382	0.068781	0.062	0.066551	0.05776	0.058644	0.059627	0.066774	0.058866	0.057774	0.059313	0.054799	0.064994	0.058845	0.055409	0.053552	0.05098	0.063663
FGDQVDKCY	293	301	1.82911	1.92962	2.07246	2.08838	2.25201	1.87946	1.92709	2.05478	2.16191	2.30043	1.86097	1.90279	2.01161	2.06617	2.16821	1.80653	1.90057	2.00417	2.1267	2.24384	0.044182	0.026362	0.031983	0.025381	0.023815	0.02333	0.015287	0.029328	0.026328	0.021766	0.024502	0.023098	0.046852	0.029224	0.026242	0.02698	0.037476	0.033886	0.033956	0.042993
KCYKCSVKQGQTLF	299	312	0.698864	0.859339	1.11159	1.28531	1.40786	0.754474	0.939204	1.23311	1.38275	1.43899	0.710775	0.854497	1.11442	1.31438	1.43081	0.705643	0.858927	1.14787	1.34813	1.39603	0.057029	0.003954	0.13286	0.015417	0.046333	0.057741	0.055072	0.080368	0.017862	0.036608	0.051613	0.076621	0.125618	0.053018	0.048272	0.074493	0.076628	0.122681	0.034106	0.06093
YKCSVKQGQTL	301	311	0.758489	0.926941	1.09547	1.11229	1.19389	0.776669	0.960626	1.09141	1.1259	1.18016	0.787617	0.948436	1.08076	1.14559	1.22007	0.769107	0.922792	1.08671	1.13452	1.18533	0.045777	0.051172	0.040103	0.051089	0.047837	0.047526	0.041756	0.042686	0.047646	0.0451	0.056657	0.045025	0.041162	0.048189	0.048169	0.049294	0.044061	0.0411	0.049994	0.048387
YKCSVKQGQTLF	301	312	0.632756	0.791013	0.93609	0.980979	1.03936	0.656434	0.830181	0.971501	1.00371	1.04302	0.674998	0.811796	0.954599	1.01098	1.0663	0.636413	0.78147	0.941264	1.00381	1.03864	0.076018	0.056468	0.072384	0.095163	0.086111	0.070317	0.059427	0.111478	0.095174	0.089756	0.067264	0.061629	0.104376	0.093826	0.081806	0.076809	0.062826	0.098865	0.09334	0.093388
LFIPTGWIHAV	311	321	0.36988	0.391827	0.495898	0.592432	0.713897	0.37582	0.394244	0.506995	0.624843	0.732241	0.321886	0.38872	0.479598	0.583852	0.710523	0.366657	0.394529	0.479783	0.594396	0.724538	0.038389	0.045698	0.040044	0.051616	0.055991	0.029327	0.032481	0.041105	0.031633	0.041456	0.030692	0.024422	0.035052	0.028122	0.034165	0.020839	0.030524	0.022832	0.02975	0.039121
LFIPTGWIHAVL	311	322	0.406981	0.413423	0.517792	0.623697	0.769437	0.395971	0.418911	0.535278	0.660515	0.772682	0.381465	0.422129	0.529107	0.634703	0.780818	0.373721	0.402992	0.509736	0.637929	0.740585	0.028817	0.02285	0.031477	0.008324	0.011939	0.024136	0.025235	0.024829	0.030847	0.019846	0.022075	0.042924	0.032709	0.035683	0.030305	0.04531	0.037379	0.03845	0.040918	0.025159
FIPTGWIHAVL	312	322	0.358133	0.387319	0.514841	0.618987	0.772953	0.363065	0.395491	0.530058	0.646841	0.788765	0.351646	0.399004	0.526261	0.628843	0.773843	0.354557	0.401864	0.52377	0.635047	0.780411	0.028607	0.026473	0.029671	0.043452	0.044387	0.028348	0.031787	0.031477	0.028956	0.041677	0.035785	0.035281	0.040783	0.038255	0.038497	0.046945	0.039204	0.041398	0.043606	0.04895
IPTGWIHA	313	320	0.483505	0.506105	0.602147	0.718317	0.901732	0.48359	0.500897	0.633006	0.763072	0.890777	0.475147	0.49789	0.606654	0.747484	0.887547	0.470295	0.497396	0.592905	0.750028	0.889947	0.02768	0.025635	0.027925	0.023659	0.013837	0.030923	0.01524	0.040742	0.02967	0.023387	0.026772	0.041376	0.038802	0.033934	0.029609	0.047078	0.047312	0.037469	0.039328	0.029125
IPTGWIHAVL	313	322	0.298751	0.313223	0.403211	0.490445	0.605567	0.304261	0.299985	0.413008	0.518913	0.614774	0.300293	0.318656	0.42123	0.495294	0.622911	0.299595	0.3098	0.396006	0.497815	0.612632	0.068638	0.062712	0.066304	0.07948	0.067144	0.064854	0.061035	0.062524	0.059369	0.065742	0.068241	0.066969	0.073198	0.062795	0.06918	0.065211	0.057122	0.058554	0.053285	0.067082
CLAFGGN	327	333	0.388769	0.362414	0.383212	0.396216	0.42108	0.402357	0.376196	0.407733	0.410985	0.430513	0.411878	0.388672	0.400799	0.420797	0.441481	0.423134	0.394588	0.418171	0.445643	0.457518	0.020815	0.016035	0.016332	0.016661	0.02037	0.0318	0.031711	0.032683	0.031492	0.032719	0.026535	0.027277	0.024069	0.026144	0.024333	0.034133	0.033202	0.033636	0.033496	0.035978
LAFGGNF	328	334	0.408918	0.415844	0.440788	0.463592	0.499382	0.427181	0.411469	0.439382	0.505719	0.503935	0.408458	0.382201	0.436783	0.44482	0.483353	0.441539	0.411902	0.453054	0.493405	0.513617	0.022235	0.009847	0.037394	0.033809	0.018143	0.032037	0.034918	0.029849	0.037729	0.040995	0.015034	0.02072	0.044085	0.029579	0.03188	0.022702	0.024288	0.030356	0.030612	0.034051
NFLHSLNIEMQLKAY	333	347	0.60691	0.567269	0.573735	0.632955	0.692102	0.607105	0.578078	0.614809	0.65453	0.700661	0.574659	0.542266	0.57074	0.645035	0.695724	0.63	0.625154	0.653545	0.687546	0.725556	0.03599	0.010217	0.039837	0.031175	0.012096	0.015677	0.015547	0.022191	0.023891	0.025984	0.015889	0.016689	0.036264	0.016946	0.021173	0.007176	0.039643	0.035939	0.019081	0.021946
FLHSLNIE	334	341	1.85119	1.80192	1.91675	2.00528	2.14834	1.8342	1.78202	1.91049	2.00493	2.13352	1.83214	1.79842	1.9134	2.03581	2.15721	1.83599	1.79289	1.89541	2.01236	2.11931	0.029432	0.032893	0.039514	0.029507	0.025288	0.031916	0.02183	0.037795	0.03518	0.025051	0.029172	0.036389	0.034857	0.027323	0.035348	0.027135	0.03378	0.031257	0.035642	0.035187
KAYEIEKRLST	345	355	2.84498	3.14246	3.4094	3.50748	3.6824	2.82297	3.11368	3.42654	3.54206	3.68162	2.79148	3.16308	3.40445	3.55917	3.71311	2.82509	3.13772	3.37878	3.56609	3.59255	0.031029	0.042801	0.073259	0.048195	0.061954	0.046412	0.029871	0.09112	0.042828	0.049899	0.033582	0.102758	0.077387	0.069826	0.069208	0.025897	0.064497	0.053455	0.0546	0.05556
KAYEIEKRLSTADL	345	358	4.53108	4.655	4.9428	5.02565	5.19321	4.48485	4.63376	4.92334	5.00911	5.14543	4.40894	4.61198	4.88512	5.02599	5.23346	4.4915	4.63013	4.85789	5.0394	5.11265	0.034805	0.054498	0.0877	0.036857	0.062945	0.038149	0.030438	0.077887	0.021562	0.064115	0.033177	0.101212	0.061372	0.119666	0.087572	0.040357	0.093455	0.046935	0.064394	0.043627
YEIEKRLSTADL	347	358	4.28373	4.37566	4.64105	4.71762	4.86152	4.24274	4.34924	4.63576	4.70191	4.83848	4.17389	4.32424	4.59016	4.74937	4.94861	4.2524	4.36041	4.58717	4.74912	4.82698	0.046641	0.047562	0.086803	0.049123	0.072804	0.043902	0.039451	0.082162	0.035289	0.071316	0.036598	0.094049	0.058556	0.098813	0.056755	0.041587	0.075961	0.048767	0.070423	0.042602
IEKRLST	349	355	2.31716	2.53929	2.75593	2.757	2.81096	2.27551	2.52518	2.72833	2.73351	2.77138	2.26561	2.54002	2.73193	2.80216	2.88734	2.31464	2.58012	2.74861	2.81076	2.8164	0.029111	0.031643	0.044128	0.04575	0.029191	0.031689	0.044607	0.054306	0.065904	0.063596	0.016757	0.041286	0.042634	0.061355	0.039884	0.031713	0.043254	0.03473	0.039815	0.039457
IEKRLSTADL	349	358	3.60026	3.53679	3.65506	3.67385	3.69745	3.57626	3.52868	3.65284	3.6465	3.68553	3.53684	3.49639	3.61474	3.70174	3.82028	3.58824	3.53398	3.62328	3.69846	3.69956	0.025298	0.030579	0.05747	0.028601	0.057745	0.024976	0.029366	0.063784	0.02173	0.062248	0.024678	0.056947	0.033762	0.063008	0.031657	0.027928	0.046092	0.027773	0.047779	0.027849
LFRFPNF	358	364	2.18537	2.23992	2.29477	2.29593	2.30424	2.16347	2.25206	2.31324	2.29537	2.31389	2.15596	2.24067	2.27811	2.31542	2.37368	2.16563	2.2342	2.28124	2.30784	2.31679	0.049154	0.054311	0.064242	0.067992	0.051505	0.053827	0.046521	0.06596	0.061297	0.05554	0.020451	0.053773	0.046949	0.074446	0.023316	0.063369	0.06323	0.056169	0.055312	0.051981
WYVGKHILDI	369	378	0.31715	0.360533	0.369347	0.457042	0.533714	0.330817	0.31677	0.380994	0.428461	0.505896	0.328026	0.371685	0.424708	0.43348	0.520305	0.351765	0.369461	0.374716	0.448451	0.47752	0.050407	0.056884	0.07053	0.032357	0.034461	0.055688	0.036503	0.048107	0.038713	0.040944	0.044128	0.07733	0.057998	0.055425	0.040986	0.087466	0.097825	0.095222	0.093854	0.09644
YVGKHILDI	370	378	0.401559	0.421791	0.439342	0.526739	0.629752	0.402815	0.390532	0.438295	0.518702	0.595522	0.410678	0.443178	0.483394	0.509938	0.58127	0.403777	0.419528	0.420985	0.509966	0.569098	0.065846	0.073948	0.069535	0.064434	0.049009	0.058179	0.041584	0.04138	0.070534	0.061337	0.056467	0.073959	0.054773	0.054413	0.051289	0.054949	0.077006	0.057983	0.065953	0.06313
YVGKHILDIF	370	379	0.342965	0.354281	0.3896	0.448489	0.558896	0.348108	0.333134	0.389536	0.429265	0.520516	0.364022	0.392774	0.431619	0.471249	0.542347	0.344384	0.353229	0.376151	0.43959	0.507576	0.048105	0.050165	0.054787	0.0621	0.050382	0.045744	0.037335	0.037118	0.050299	0.047926	0.044405	0.067722	0.065975	0.065676	0.052979	0.03712	0.048715	0.042919	0.060822	0.046808
VGKHILD	371	377	0.241557	0.238221	0.255106	0.299512	0.34533	0.28184	0.260038	0.277162	0.311585	0.361255	0.242582	0.242457	0.267478	0.306338	0.352585	0.247939	0.251924	0.260061	0.289747	0.332489	0.051103	0.053647	0.053505	0.051621	0.053286	0.057013	0.040867	0.046496	0.046517	0.04296	0.05402	0.061948	0.057245	0.057425	0.053239	0.041601	0.05189	0.060218	0.044436	0.047309
GKHILDIF	372	379	0.299172	0.319735	0.316848	0.368758	0.417455	0.325387	0.326351	0.328065	0.33652	0.376136	0.332002	0.338616	0.34133	0.379207	0.434998	0.309501	0.331792	0.322351	0.326812	0.413688	0.014458	0.033842	0.023043	0.024789	0.030271	0.007131	0.016814	0.013973	0.012089	0.015654	0.027814	0.02628	0.027011	0.048847	0.025455	0.023798	0.024791	0.020286	0.023386	0.014746
IFRGLRENRRHPASY	378	392	2.58789	2.61879	2.87856	2.9518	3.01981	2.58062	2.64301	2.89909	2.96261	3.02622	2.57014	2.60325	2.83326	3.0179	3.13403	2.58144	2.61556	2.85396	3.00522	3.02929	0.020211	0.022422	0.073212	0.051154	0.051109	0.026457	0.033839	0.069456	0.01643	0.06027	0.037717	0.070521	0.047272	0.051668	0.03582	0.038049	0.055188	0.032247	0.041796	0.025673
RGLRENRRHPASY	380	392	2.5591	2.43293	2.56079	2.59976	2.60396	2.53641	2.43765	2.57644	2.54374	2.5849	2.54456	2.43105	2.53679	2.64904	2.73997	2.54879	2.44348	2.5482	2.62071	2.63031	0.01445	0.017364	0.056261	0.048055	0.080169	0.018534	0.043701	0.051558	0.026763	0.08739	0.020801	0.052145	0.024189	0.065576	0.031133	0.030742	0.043002	0.020603	0.044244	0.039159
YLVHGGKALN	392	401	0.527314	0.701655	0.950083	1.1899	1.54108	0.536691	0.650234	0.926755	1.1653	1.44391	0.541831	0.744846	0.994097	1.22377	1.53578	0.502722	0.691309	0.922509	1.18678	1.46952	0.050346	0.049014	0.036371	0.03684	0.040554	0.042293	0.020681	0.026193	0.024111	0.031348	0.047908	0.064584	0.051235	0.051723	0.034075	0.02794	0.04419	0.029516	0.045557	0.033863
YLVHGGKALNLA	392	403	0.488947	0.644249	0.876656	1.05672	1.42424	0.503063	0.618125	0.885772	1.09356	1.34275	0.539847	0.652719	0.90886	1.14304	1.3953	0.513772	0.654471	0.838734	1.10897	1.35821	0.040608	0.055409	0.04391	0.06855	0.037786	0.06396	0.038204	0.04534	0.06364	0.042289	0.061552	0.063791	0.057844	0.014794	0.024937	0.068466	0.047932	0.047795	0.05291	0.039056
LVHGGKALN	393	401	0.476745	0.527507	0.592415	0.679544	0.888221	0.473806	0.482876	0.565476	0.64881	0.802822	0.494102	0.562046	0.632279	0.726943	0.898316	0.466258	0.531944	0.581428	0.685428	0.83199	0.065197	0.059328	0.053965	0.043096	0.038668	0.07064	0.039698	0.041885	0.041627	0.042815	0.061437	0.073772	0.059308	0.05197	0.041383	0.038264	0.05768	0.04852	0.058041	0.047244
LVHGGKALNL	393	402	0.371754	0.434305	0.494747	0.605762	0.768085	0.38131	0.403567	0.474787	0.555797	0.687833	0.432587	0.491131	0.562819	0.606231	0.763131	0.363037	0.438596	0.4765	0.570595	0.709502	0.041394	0.048491	0.038457	0.036511	0.055274	0.035811	0.029073	0.031549	0.036131	0.049633	0.046455	0.053779	0.039638	0.053168	0.050394	0.031179	0.040802	0.032846	0.041758	0.052348
LVHGGKALNLA	393	403	0.496179	0.549	0.612079	0.726223	0.959008	0.494902	0.487212	0.593501	0.688256	0.852045	0.498926	0.596052	0.66972	0.764948	0.933422	0.474583	0.549321	0.589564	0.702528	0.863558	0.045208	0.05559	0.054358	0.064092	0.074571	0.055885	0.031118	0.040396	0.052673	0.082447	0.033182	0.0897	0.076989	0.075272	0.05618	0.026016	0.055399	0.052737	0.064127	0.069223
LVHGGKALNLAF	393	404	0.399451	0.449041	0.511174	0.698135	0.912414	0.400714	0.429757	0.50069	0.602298	0.769965	0.394538	0.494041	0.623873	0.681497	0.88634	0.381525	0.462654	0.511787	0.652451	0.740943	0.041477	0.064512	0.057452	0.102039	0.072253	0.037926	0.023407	0.043467	0.04951	0.097991	0.052265	0.08161	0.101405	0.105724	0.114867	0.031257	0.065961	0.041427	0.089911	0.053412
VHGGKALN	394	401	0.364869	0.379613	0.423374	0.465696	0.630406	0.358917	0.357648	0.383957	0.46673	0.520722	0.364418	0.396566	0.435026	0.488106	0.586085	0.354087	0.381838	0.406551	0.477418	0.661724	0.026173	0.052487	0.034454	0.038444	0.107985	0.044669	0.041774	0.03547	0.066911	0.049137	0.046366	0.058956	0.043062	0.051174	0.060096	0.048987	0.048692	0.059727	0.046305	0.126963
AFRAWTRKEALPDHE	403	417	3.27454	3.2938	3.43186	3.51357	3.66333	3.25793	3.2884	3.41663	3.51804	3.62262	3.29697	3.29378	3.41775	3.56908	3.71448	3.30512	3.29318	3.3995	3.55542	3.61639	0.038404	0.055912	0.075854	0.039075	0.038051	0.031471	0.047712	0.067628	0.033647	0.039067	0.033417	0.074555	0.062215	0.040233	0.055222	0.053029	0.065407	0.050002	0.04016	0.037749
AFRAWTRKEALPDHEDEIPET	403	423	4.64687	4.78333	5.0921	5.1951	5.40806	4.5837	4.77463	5.0849	5.17296	5.3252	4.64868	4.78679	5.04788	5.29441	5.52997	4.6838	4.79095	5.0767	5.28106	5.3311	0.033871	0.029187	0.08337	0.048777	0.074575	0.02088	0.018426	0.081713	0.015522	0.08757	0.028297	0.076042	0.069117	0.056426	0.046012	0.033376	0.073399	0.027037	0.032742	0.023413
FRAWTRKEALPDHE	404	417	3.1529	3.13754	3.22601	3.28049	3.37834	3.12656	3.14557	3.23137	3.27816	3.33912	3.12553	3.10628	3.20196	3.3095	3.3974	3.16625	3.12904	3.21259	3.30317	3.35379	0.048722	0.043716	0.049462	0.047004	0.057929	0.039207	0.036536	0.062323	0.03954	0.057943	0.073946	0.06257	0.06577	0.07603	0.06778	0.045637	0.050113	0.037142	0.053182	0.046229
RAWTRKEALPDHE	405	417	3.12271	3.09651	3.24087	3.28041	3.41453	3.09734	3.09154	3.20427	3.25628	3.37193	3.11631	3.08495	3.21549	3.33109	3.44521	3.13492	3.11955	3.20449	3.32906	3.39885	0.140728	0.132938	0.109148	0.12723	0.08739	0.135451	0.133722	0.135811	0.145441	0.119636	0.138921	0.132011	0.109654	0.148997	0.120866	0.135009	0.117425	0.12522	0.096447	0.083115
RAWTRKEALPDHEDEIPET	405	423	4.47433	4.56274	4.82559	4.89882	5.04525	4.40768	4.54329	4.8103	4.89248	5.01147	4.46021	4.54282	4.77343	5.00541	5.17459	4.50448	4.58132	4.79775	4.97477	5.03059	0.109587	0.130098	0.15037	0.123496	0.071971	0.134389	0.124741	0.126089	0.039992	0.074165	0.076189	0.130326	0.100733	0.067564	0.061824	0.107303	0.123405	0.105292	0.054853	0.044107
DEIPETVRT	418	426	3.90262	3.7482	3.90261	3.92121	3.99547	3.89205	3.77064	3.93182	3.92534	3.99548	3.88733	3.72848	3.83061	3.98718	4.13537	3.92981	3.76724	3.88742	4.01304	4.02117	0.031027	0.014972	0.070898	0.052372	0.071218	0.019986	0.056357	0.061804	0.010929	0.088781	0.018682	0.062123	0.024137	0.058261	0.012725	0.022399	0.051962	0.015957	0.037696	0.024191
DEIPETVRTVQ	418	428	5.1889	4.91517	5.05891	5.0656	5.13561	5.14651	4.90355	5.04859	5.03947	5.11504	5.18245	4.91024	5.01725	5.18043	5.36132	5.2057	4.91857	5.02782	5.15823	5.15801	0.024844	0.02036	0.072794	0.049423	0.05767	0.026458	0.045792	0.079802	0.028135	0.067109	0.039677	0.067633	0.045062	0.083598	0.040733	0.029046	0.057826	0.028134	0.073356	0.026376
LIKDLARE	429	436	0.381671	0.477771	0.665922	0.871907	1.21568	0.383455	0.434235	0.636717	0.84843	1.11787	0.371234	0.497698	0.690372	0.906643	1.17585	0.366938	0.47613	0.647128	0.882636	1.13468	0.036484	0.063839	0.048856	0.032152	0.025208	0.034531	0.022661	0.033892	0.01922	0.014152	0.044768	0.081582	0.057221	0.031881	0.035851	0.012326	0.064686	0.032009	0.031253	0.018953
IKDLARE	430	436	0.300208	0.324088	0.373222	0.478481	0.661843	0.300692	0.287259	0.359833	0.441837	0.592747	0.307024	0.346503	0.407459	0.494188	0.637902	0.300852	0.323241	0.361377	0.468674	0.598561	0.052691	0.060809	0.064319	0.048398	0.049113	0.052576	0.034698	0.045522	0.050031	0.04758	0.056286	0.093447	0.075646	0.069227	0.055787	0.041993	0.067461	0.054182	0.058839	0.045247
VEDIFQQN	440	447	3.4644	3.13072	3.08677	3.08498	3.10894	3.49187	3.11297	3.14424	3.10122	3.16296	3.47192	3.17489	3.08378	3.22616	3.16353	3.48731	3.04637	2.98242	3.11042	2.9603	0.083755	0.075854	0.066005	0.070984	0.081247	0.046789	0.017979	0.08928	0.071893	0.083698	0.062745	0.101112	0.052168	0.092452	0.077824	0.138328	0.066986	0.082604	0.177258	0.088414

## Sheet: PHD_StateData
			Mean Relative Deuterium Uptake (Da)															SD Relative Deuterium Uptake (Da)
Row Labels	Start	End	DMSO					H3K4Me3					OC9					DMSO					H3K4Me3					OC9
ASVPVYCL	2	9	2.38336	3.08152	3.39495	3.32195	3.36924	1.83743	2.13967	2.46177	2.70128	3.16161	1.60537	1.76473	1.98345	2.12263	2.23407	0.036996	0.048857	0.045442	0.095759	0.038243	0.023227	0.039359	0.037369	0.030476	0.062574	0.011779	0.023639	0.011267	0.042139	0.009059
LCRLPYDVTRF	9	19	4.58755	4.4261	4.69844	4.78353	4.835	4.23174	4.1684	4.21355	4.27963	4.58248	2.82429	3.12725	3.50605	3.76551	4.07995	0.038488	0.060468	0.044871	0.07622	0.057251	0.04695	0.053105	0.0619	0.042891	0.044797	0.052436	0.048174	0.048558	0.048278	0.046715
CRLPYDVTRF	10	19	4.2585	4.0974	4.35927	4.45631	4.48918	4.07818	3.89563	3.9053	3.98013	4.25818	2.85367	3.09893	3.43865	3.65654	3.8939	0.01037	0.055791	0.022795	0.076582	0.048376	0.013755	0.025896	0.048306	0.017871	0.023161	0.023753	0.011008	0.007039	0.027788	0.013218
CRLPYDVTRFMIEC	10	23	4.31361	4.22277	4.42031	4.52711	4.55844	4.0174	3.81502	3.84642	3.91128	4.22604	2.72293	3.04498	3.3542	3.56171	3.76718	0.049441	0.074875	0.038511	0.074869	0.083183	0.029289	0.01293	0.049416	0.048781	0.046384	0.048539	0.047519	0.02392	0.030391	0.02046
RLPYDVTRF	11	19	3.98178	3.82314	4.12247	4.10559	4.18836	3.63637	3.61963	3.632	3.72236	3.95504	2.35608	2.66509	2.98184	3.19386	3.44643	0.02764	0.06491	0.018368	0.058909	0.050366	0.034198	0.017788	0.092282	0.025993	0.03467	0.060112	0.02971	0.030906	0.055209	0.039936
PYDVTRF	13	19	3.15633	2.88324	2.86876	2.85391	2.88575	3.04917	2.88324	2.86019	2.86275	3.00233	2.10699	2.2133	2.49373	2.67647	2.9015	0.018416	0.045483	0.016129	0.017568	0.030481	0.019282	0.008276	0.04608	0.022635	0.003299	0.004996	0.014898	0.022233	0.033017	0.00506
MCQDWFHGSC	25	34	1.39697	1.64009	1.81799	1.88945	1.94334	1.33148	1.52878	1.75438	1.82685	2.00517	1.06968	1.29573	1.48659	1.61955	1.7786	0.071056	0.071018	0.098018	0.088453	0.125187	0.070154	0.063228	0.056703	0.055853	0.06965	0.064952	0.037073	0.044907	0.044003	0.039458
CQDWFHGSC	26	34	1.15909	1.26751	1.39395	1.46867	1.53622	1.172	1.28898	1.41844	1.48097	1.58679	0.95437	1.11974	1.30161	1.43105	1.5351	0.022749	0.022785	0.029851	0.045625	0.036432	0.017362	0.024429	0.016842	0.024775	0.017122	0.016476	0.036417	0.014617	0.026454	0.015465
CQDWFHGSCVG	26	36	1.72326	1.82732	1.91385	2.00337	2.10795	1.73881	1.81966	1.92156	2.01131	2.0889	1.55093	1.67581	1.81696	1.93494	2.03324	0.052708	0.060818	0.058092	0.06431	0.073703	0.049718	0.046253	0.068676	0.059999	0.05819	0.045335	0.058462	0.037385	0.051001	0.045497
DWFHGSC	28	34	0.840283	0.909631	1.00309	1.06709	1.11633	0.833316	0.915144	0.999062	1.07512	1.13396	0.675807	0.817307	0.921692	1.01591	1.10455	0.03663	0.038249	0.05618	0.063573	0.070611	0.014225	0.041875	0.029838	0.025418	0.017579	0.064608	0.046754	0.040495	0.045738	0.040351
WFHGSCVG	29	36	1.42882	1.44068	1.51477	1.54933	1.59843	1.39515	1.40961	1.4685	1.48881	1.53603	1.28422	1.31009	1.39574	1.45109	1.49903	0.014918	0.016935	0.019582	0.029225	0.027539	0.016315	0.018888	0.020085	0.015736	0.015118	0.037187	0.041116	0.041271	0.044455	0.037855
FHGSCVG	30	36	1.31371	1.34356	1.41142	1.44938	1.46016	1.29821	1.34939	1.40474	1.40216	1.4568	1.26641	1.28366	1.33858	1.39377	1.41553	0.048804	0.053088	0.051316	0.066959	0.04818	0.042233	0.052413	0.008909	0.04352	0.028187	0.042581	0.049539	0.049954	0.047392	0.045479
VGVEEEKAAD	35	44	4.17748	4.0016	4.10628	4.16178	4.31981	4.03519	3.91335	3.92369	3.95076	4.1927	3.41328	3.47541	3.7009	3.89635	4.14568	0.023469	0.05955	0.041889	0.075012	0.043925	0.01713	0.016844	0.078299	0.016652	0.017283	0.056257	0.04027	0.01721	0.061242	0.013422
GVEEEKAAD	36	44	3.71076	3.42438	3.64402	3.59992	3.79746	3.64616	3.41189	3.45015	3.45249	3.67323	2.98598	3.0859	3.2093	3.30057	3.63334	0.072246	0.050977	0.062531	0.091642	0.030323	0.091208	0.044863	0.057009	0.05151	0.021602	0.051155	0.079705	0.041961	0.131231	0.031601
VEEEKAAD	37	44	3.46134	3.25991	3.26048	3.22114	3.22375	3.39622	3.26493	3.22766	3.20323	3.37305	2.74631	2.8105	3.02228	3.19416	3.39718	0.018899	0.054074	0.02241	0.057365	0.04532	0.008783	0.012819	0.065004	0.025129	0.010276	0.033146	0.03873	0.028582	0.043986	0.020382
EEEKAAD	38	44	3.0096	2.80942	2.85315	2.83456	2.85361	2.96471	2.83201	2.82125	2.77885	2.9467	2.37937	2.4305	2.61198	2.75472	2.9083	0.018521	0.06086	0.007543	0.040992	0.035946	0.019451	0.029336	0.11137	0.012316	0.029089	0.047538	0.04424	0.012493	0.048679	0.020831
KAADIDL	41	47	1.64745	1.86997	2.24977	2.4852	2.6287	1.71261	1.85764	2.1757	2.36588	2.62048	1.21419	1.40244	1.55535	1.64014	1.76059	0.00913	0.029822	0.028006	0.070487	0.016751	0.019038	0.017091	0.039321	0.00571	0.023034	0.004803	0.0205	0.027952	0.025581	0.024085
YHCPNCE	48	54	0.608913	0.771621	0.777124	0.838143	0.887554	0.563954	0.723597	0.770622	0.815491	0.768365	0.481816	0.663429	0.766128	0.772405	0.752781	0.058564	0.052408	0.045582	0.057864	0.051021	0.055218	0.054716	0.072926	0.051691	0.046677	0.058811	0.065782	0.052411	0.061453	0.054725
YHCPNCEVL	48	56	1.93367	1.99986	2.09437	2.12738	2.17185	1.86306	1.96402	1.985	2.05714	2.04057	1.79137	1.8926	2.00046	1.95041	1.97644	0.054748	0.063036	0.08593	0.046594	0.058058	0.041963	0.063449	0.053825	0.061735	0.050038	0.059336	0.071037	0.078412	0.092132	0.041485
EVLHGPSIM	54	62	3.24683	3.12784	3.1057	3.05823	3.10058	3.17866	3.07585	3.02852	3.01707	3.19339	3.21182	3.04686	3.00854	3.04495	3.17968	0.030597	0.054897	0.026799	0.049647	0.0456	0.033673	0.027692	0.081515	0.023943	0.028768	0.054621	0.078519	0.040019	0.065361	0.035433
VLHGPSIM	55	62	2.61364	2.54591	2.53714	2.4885	2.51543	2.53549	2.49671	2.45251	2.42752	2.57706	2.58852	2.48238	2.44636	2.4743	2.5848	0.031308	0.046831	0.026376	0.06751	0.05086	0.027442	0.028813	0.064192	0.039867	0.028703	0.036464	0.068716	0.043897	0.049346	0.030155
LHGPSIM	56	62	2.30187	2.18348	2.18387	2.15155	2.1606	2.23961	2.19404	2.15148	2.12652	2.22466	2.30434	2.1599	2.12429	2.16762	2.2325	0.014494	0.046787	0.015085	0.051301	0.026177	0.021214	0.053263	0.042072	0.030401	0.027669	0.025462	0.051254	0.022435	0.023684	0.018592

## Sheet: DualDomain_Peptides
																								No significant difference
																							0
																								-0.01	-0.026	-0.042	-0.058	-0.074	-0.09	-0.106	-0.122	-0.138	-0.154	-0.17	-0.186	-0.202	-0.218	-0.234	-0.25	-0.266	-0.282	-0.298	-0.314	-0.33	-0.346	-0.362	-0.378	-0.394	-0.41
Sequence	Start	End		H3[1-21]K4me3						OC3						OC9
ASVPVYCL	2	9		-0.61184	-0.88431	-0.873073	-0.569197	0		-0.667636	-0.99403	-0.990042	-0.767361	-0.578571		-0.900474	-1.36567	-1.58405	-1.47131	-1.40749
LCRLPYDVTRF	9	19		0	0	0	-0.329409	0		-0.483547	0	0	0	0		-1.61448	-1.04705	-0.970954	-0.796305	-0.722852
CRLPYDVTRF	10	19		0	0	0	0	0		0	0	0	0	0		-1.30251	-0.812529	-0.758512	-0.615201	-0.5969
MCQDWFHGSC	25	34		0	0	0	0	0		0	0	0	0	0		0	0	0	0	0
CQDWFHGSC	26	34		0	0	0	0	0		0	0	0	0	0		0	0	0	0	0
DWFHGSC	28	34		0	0	0	0	0		0	0	0	0	0		0	0	0	0	0
WFHGSCVG	29	36		0	0	0	0	0		0	0	0	0	0		0	0	0	0	0
FHGSCVG	30	36		0	0	0	0	0		0	0	0	0	0		0	0	0	0	0
VGVEEEKAAD	35	44		0	0	0	0	0		-0.498409	0	0	0	0		-0.6703	-0.318506	0	0	0
VEEEKAAD	37	44		0	0	0	0	0		-0.493474	0	0	0	0		-0.698165	-0.325115	0	0	0
YHCPNCE	48	54		0	0	0	0	0		0	0	0	0	0		0	0	0	0	0
EVLHGPSIM	54	62		0	0	0	0	0		-0.478806	0	0	0	0		0	0	0	0	0
KKRRGSSKGHDTHKGKPVKTGSPTF	63	87		0	0	0	0	0		0	0	0	0	0		0	0	0	0	0
VRELRSRTFDSSD	88	100		0	0	0	0	0		0	0	0	0	0		0	0	0	0	0
VRELRSRTFDSSDE	88	101		0	0	0	0	0		0	0	0	0	0		0	0	0	0	0
LRSRTFDSSD	91	100		0	0	0	0	0		0	0	0	0	0		0	0	0	0	0
EVILKPTGNQ	101	110		0	0	0	0	0		0	0	0	0	0		0	0	0	0	0
EVILKPTGNQL	101	111		0	0	0	0	0		0	0	0	0	0		0	0	0	0	0
EVILKPTGNQLT	101	112		0	0	0	0	0		0	0	0	0	0		0	0	0	0	0
VILKPTGNQL	102	111		0	0	0	0	0		0	0	0	0	0		0	0	0	0	0
ILKPTGNQ	103	110		0	0	0	0	0		0	0	0	0	0		0	0	0	0	0
KPTGNQL	105	111		0	0	0	0	0		0	0	0	0	0		0	0	0	0	0
NSFSVPIL	119	126		0	0	0	0	0		0	0	0	0	0		0	0	0	0	0
FSVPILVL	121	128		0	0	0	0	0		0	0	0	0	0		0	0	0	0	0
SVPILVL	122	128		0	0	0	0	0		0	0	0	0	0		0	0	0	0	0
VLKKDGLG	127	134		0	0	0	0	0		0	0	0	0	0		0	0	0	0	0
VLKKDGLGMTLPSPSF	127	142		0	0	0	0	0		0	0	0	0	0		0	0	0	0	0
KKDGLGMTLPSPSF	129	142		0	0	0	0	0		0	0	0	0	0		0	0	0	0	0
MTLPSPSF	135	142		0	0	0	0	0		0	0	0	0	0		0	0	0	0	0
TVRDVEHYVGSD	143	154		0	0	0	0	0		0	0	0	0	0		0	0	0	0	0
TVRDVEHYVGSDKE	143	156		0	0	0	0	0		0	0	0	0	0		0	0	0	0	0
TVRDVEHYVGSDKEID	143	158		0	0	0	0	0		0	0	0	0	0		0	0	0	0	0
TVRDVEHYVGSDKEIDV	143	159		0	0	0	0	0		0	0	0	0	0		0	0	0	0	0
VEHYVGSDKEID	147	158		0	0	0	0	0		0	0	0	0	0		0	0	0	0	0
VIDVTRQAD	159	167		0	0	0	0	0		-0.916264	-0.645776	-0.50536	-0.352989	0		0	0	0	0	0
VIDVTRQADC	159	168		0	0	0	0	0		-1.17103	-0.919292	-0.666769	-0.419089	0		0	0	0	0	0
IDVTRQADCKM	160	170		0	0	0	0	0		-1.27845	-0.774815	-0.587526	-0.452015	-0.475478		0	0	0	0	0
VTRQADC	162	168		0	0	0	0	0		-0.806288	-0.412728	0	0	0		0	0	0	0	0
VTRQADCKMKLGD	162	174		0	0	0	0	0		-1.26415	-0.658057	-0.518095	-0.324244	-0.407363		0	0	0	0	0
TRQADCKMKLGD	163	174		0	0	0	0	0		-1.3304	-0.716565	-0.502776	-0.363556	-0.334744		0	0	0	0	0
KMKLGDF	169	175		0	0	0	0	0		-0.415245	0	0	0	0		0	0	0	0	0
FVKYYYSGKREKVLNV	175	190		0	0	0	0	0		0	-0.339026	-0.612816	-0.734973	-0.96936		0	0	0	0	0
KYYYSGKREK	177	186		0	0	0	0	0		0	0	-0.413926	-0.447723	-0.566072		0	0	0	0	0
YYSGKREKVLNV	179	190		0	0	0	0	0		0	-0.341011	-0.620661	-0.673098	-0.79721		0	0	0	0	0
YSGKREKVLNV	180	190		0	0	0	0	0		0	0	-0.469662	-0.525888	-0.612605		0	0	0	0	0
SGKREKVLNV	181	190		0	0	0	0	0		0	0	-0.497085	-0.499405	-0.639523		0	0	0	0	0
LEFSDTRL	193	200		0	0	0	0	0		0	0	0	0	0		0	0	0	0	0
EFSDTRL	194	200		0	0	0	0	0		0	0	0	0	0		0	0	0	0	0
EFSDTRLSNL	194	203		0	0	0	0	0		0	0	0	0	0		0	0	0	0	0
FSDTRLSNL	195	203		0	0	0	0	0		0	0	0	0	0		0	0	0	0	0
VETPKIVRKLSW	204	215		0	0	0	0	0		0	0	0	0	0		0	0	0	0	0
VETPKIVRKLSWVE	204	217		0	0	0	0	0		0	0	0	0	0		0	0	0	0	0
VETPKIVRKLSWVENL	204	219		0	0	0	0	0		0	0	0	0	0		0	0	0	0	0
ETPKIVRKLSW	205	215		0	0	0	0	0		0	0	0	0	0		0	0	0	0	0
PKIVRKLSW	207	215		0	0	0	0	0		0	0	0	0	0		0	0	0	0	0
VRKLSWVENL	210	219		0	0	0	0	0		0	0	0	0	0		0	0	0	0	0
VENLWPEE	216	223		0	0	0	0	0		0	0	0	0	0		0	0	0	0	0
VENLWPEEC	216	224		0	0	0	0	0		0	0	0	0	0		0	0	0	0	0
VENLWPEECV	216	225		0	0	0	0	0		0	0	0	0	0		0	0	0	0	0
NLWPEEC	218	224		0	0	0	0	0		0	0	0	0	0		0	0	0	0	0
CVFERPNVQKYCL	224	236		0	0	0	0	0		0	0	0	0	0		0	0	0	0	0
VFERPNVQKYCL	225	236		0	0	0	0	0		0	0	0	0	0		0	0	0	0	0
FERPNVQKYCL	226	236		0	0	0	0	0		0	0	0	0	0		0	0	0	0	0
ERPNVQKYCL	227	236		0	0	0	0	0		0	0	0	0	0		0	0	0	0	0
RPNVQKYCL	228	236		0	0	0	0	0		0	0	0	0	0		0	0	0	0	0
MSVRDSYTDF	237	246		0	0	0	0	0		0	0	0	0	0		0	0	0	0	0
SVRDSYTDF	238	246		0	0	0	0	0		0	0	0	0	0		0	0	0	0	0
RDSYTDF	240	246		0	0	0	0	0		0	0	0	0	0		0	0	0	0	0
HIDFGGTSV	247	255		0	0	0	0	0		0	0	0	0	0		0	0	0	0	0
HIDFGGTSVW	247	256		0	0	0	0	0		0	0	0	0	0		0	0	0	0	0
HIDFGGTSVWY	247	257		0	0	0	0	0		0	0	0	0	0		0	0	0	0	0
WYHVLKGEKIF	256	266		0	0	0	0	0		0	0	0	0	0		0	0	0	0	0
WYHVLKGEKIFY	256	267		0	0	0	0	0		0	0	0	0	0		0	0	0	0	0
YHVLKGEKIFY	257	267		0	0	0	0	0		0	0	0	0	0		0	0	0	0	0
HVLKGEKIFY	258	267		0	0	0	0	0		0	0	0	0	0		0	0	0	0	0
LIRPTNA	268	274		0	0	0	0	0		0	0	0	0	0		0	0	0	0	0
LIRPTNAN	268	275		0	0	0	0	0		0	0	0	0	0		0	0	0	0	0
LIRPTNANL	268	276		0	0	0	0	0		0	0	0	0	0		0	0	0	0	0
LIRPTNANLTL	268	278		0	0	0	0	0		0	0	0	0	0		0	0	0	0	0
WSSSSNQ	282	288		0	0	0	0	0		0	0	0	0	0		0	0	0	0	0
WSSSSNQNEM	282	291		0	0	0	0	0		0	0	0	0	0		0	0	0	0	0
WSSSSNQNEMF	282	292		0	0	0	0	0		0	0	0	0	0		0	0	0	0	0
SSSSNQNEM	283	291		0	0	0	0	0		0	0	0	0	0		0	0	0	0	0
SSSSNQNEMF	283	292		0	0	0	0	0		0	0	0	0	0		0	0	0	0	0
FFGDQVDKC	292	300		0	0	0	0	0		0	0	0	0	0		0	0	0	0	0
FFGDQVDKCY	292	301		0	0	0	0	0		0	0	0	0	0		0	0	0	0	0
FGDQVDKC	293	300		0	0	0	0	0		0	0	0	0	0		0	0	0	0	0
FGDQVDKCY	293	301		0	0	0	0	0		0	0	0	0	0		0	0	0	0	0
KCYKCSVKQGQTLF	299	312		0	0	0	0	0		0	0	0	0	0		0	0	0	0	0
YKCSVKQGQTL	301	311		0	0	0	0	0		0	0	0	0	0		0	0	0	0	0
YKCSVKQGQTLF	301	312		0	0	0	0	0		0	0	0	0	0		0	0	0	0	0
LFIPTGWIHAV	311	321		0	0	0	0	0		0	0	0	0	0		0	0	0	0	0
LFIPTGWIHAVL	311	322		0	0	0	0	0		0	0	0	0	0		0	0	0	0	0
FIPTGWIHAVL	312	322		0	0	0	0	0		0	0	0	0	0		0	0	0	0	0
IPTGWIHA	313	320		0	0	0	0	0		0	0	0	0	0		0	0	0	0	0
IPTGWIHAVL	313	322		0	0	0	0	0		0	0	0	0	0		0	0	0	0	0
CLAFGGN	327	333		0	0	0	0	0		0	0	0	0	0		0	0	0	0	0
LAFGGNF	328	334		0	0	0	0	0		0	0	0	0	0		0	0	0	0	0
NFLHSLNIEMQLKAY	333	347		0	0	0	0	0		0	0	0	0	0		0	0	0	0	0
FLHSLNIE	334	341		0	0	0	0	0		0	0	0	0	0		0	0	0	0	0
KAYEIEKRLST	345	355		0	0	0	0	0		0	0	0	0	0		0	0	0	0	0
KAYEIEKRLSTADL	345	358		0	0	0	0	0		0	0	0	0	0		0	0	0	0	0
YEIEKRLSTADL	347	358		0	0	0	0	0		0	0	0	0	0		0	0	0	0	0
IEKRLST	349	355		0	0	0	0	0		0	0	0	0	0		0	0	0	0	0
IEKRLSTADL	349	358		0	0	0	0	0		0	0	0	0	0		0	0	0	0	0
LFRFPNF	358	364		0	0	0	0	0		0	0	0	0	0		0	0	0	0	0
WYVGKHILDI	369	378		0	0	0	0	0		0	0	0	0	0		0	0	0	0	0
YVGKHILDI	370	378		0	0	0	0	0		0	0	0	0	0		0	0	0	0	0
YVGKHILDIF	370	379		0	0	0	0	0		0	0	0	0	0		0	0	0	0	0
VGKHILD	371	377		0	0	0	0	0		0	0	0	0	0		0	0	0	0	0
GKHILDIF	372	379		0	0	0	0	0		0	0	0	0	0		0	0	0	0	0
IFRGLRENRRHPASY	378	392		0	0	0	0	0		0	0	0	0	0		0	0	0	0	0
RGLRENRRHPASY	380	392		0	0	0	0	0		0	0	0	0	0		0	0	0	0	0
YLVHGGKALN	392	401		0	0	0	0	0		0	0	0	0	0		0	0	0	0	0
YLVHGGKALNLA	392	403		0	0	0	0	0		0	0	0	0	0		0	0	0	0	0
LVHGGKALN	393	401		0	0	0	0	0		0	0	0	0	0		0	0	0	0	0
LVHGGKALNL	393	402		0	0	0	0	0		0	0	0	0	0		0	0	0	0	0
LVHGGKALNLA	393	403		0	0	0	0	0		0	0	0	0	0		0	0	0	0	0
LVHGGKALNLAF	393	404		0	0	0	0	0		0	0	0	0	0		0	0	0	0	0
VHGGKALN	394	401		0	0	0	0	0		0	0	0	0	0		0	0	0	0	0
AFRAWTRKEALPDHE	403	417		0	0	0	0	0		0	0	0	0	0		0	0	0	0	0
AFRAWTRKEALPDHEDEIPET	403	423		0	0	0	0	0		0	0	0	0	0		0	0	0	0	0
FRAWTRKEALPDHE	404	417		0	0	0	0	0		0	0	0	0	0		0	0	0	0	0
RAWTRKEALPDHE	405	417		0	0	0	0	0		0	0	0	0	0		0	0	0	0	0
RAWTRKEALPDHEDEIPET	405	423		0	0	0	0	0		0	0	0	0	0		0	0	0	0	0
DEIPETVRT	418	426		0	0	0	0	0		0	0	0	0	0		0	0	0	0	0
DEIPETVRTVQ	418	428		0	0	0	0	0		0	0	0	0	0		0	0	0	0	0
LIKDLARE	429	436		0	0	0	0	0		0	0	0	0	0		0	0	0	0	0
IKDLARE	430	436		0	0	0	0	0		0	0	0	0	0		0	0	0	0	0
VEDIFQQN	440	447		0	0	0	0	0		0	0	0	0	0		0	0	0	0	0
				|	|	|	|	|		|	|	|	|	|		|	|	|	|	|
				1	5	15	30	60		1	5	15	30	60		1	5	15	30	60
				Labelling time (min)						Labelling time (min)						Labelling time (min)
[truncated: 75 more columns]

## Sheet: DualDomain_Residues
																								0
																									-1.7434e-16	-0.0032	-0.0064	-0.0096	-0.0128	-0.016	-0.0192	-0.0224	-0.0256	-0.0288	-0.032	-0.0352	-0.0384	-0.0416	-0.0448	-0.048	-0.0512	-0.0544	-0.0576	-0.0608	-0.064	-0.0672	-0.0704	-0.0736	-0.0768
				PHD+JmjC						PHD+JmjC						PHD+JmjC
				H3[1-21]K4me3						OC3						OC9
	1
Residue			1	10	10	10	10	10		10	10	10	10	10		10	10	10	10	10
			2	10	10	10	10	10		10	10	10	10	10		10	10	10	10	10
			3	10	10	10	10	10		10	10	10	10	10		10	10	10	10	10
			4	-0.122368	-0.176862	-0.174615	-0.113839	0		-0.133527	-0.198806	-0.198008	-0.153472	-0.115714		-0.180095	-0.273133	-0.31681	-0.294262	-0.281497
			5	-0.122368	-0.176862	-0.174615	-0.113839	0		-0.133527	-0.198806	-0.198008	-0.153472	-0.115714		-0.180095	-0.273133	-0.31681	-0.294262	-0.281497
			6	-0.122368	-0.176862	-0.174615	-0.113839	0		-0.133527	-0.198806	-0.198008	-0.153472	-0.115714		-0.180095	-0.273133	-0.31681	-0.294262	-0.281497
			7	-0.122368	-0.176862	-0.174615	-0.113839	0		-0.133527	-0.198806	-0.198008	-0.153472	-0.115714		-0.180095	-0.273133	-0.31681	-0.294262	-0.281497
			8	-0.122368	-0.176862	-0.174615	-0.113839	0		-0.133527	-0.198806	-0.198008	-0.153472	-0.115714		-0.180095	-0.273133	-0.31681	-0.294262	-0.281497
			9	-0.122368	-0.176862	-0.174615	-0.113839	0		-0.133527	-0.198806	-0.198008	-0.153472	-0.115714		-0.180095	-0.273133	-0.31681	-0.294262	-0.281497
			10	10	10	10	10	10		10	10	10	10	10		10	10	10	10	10
			11	0	0	0	-0.0411761	0		-0.0604434	0	0	0	0		-0.20181	-0.130881	-0.121369	-0.0995381	-0.0903565
			12	0	0	0	-0.0205881	0		-0.0302217	0	0	0	0		-0.193941	-0.123478	-0.114864	-0.093712	-0.087814
			13	0	0	0	-0.0205881	0		-0.0302217	0	0	0	0		-0.193941	-0.123478	-0.114864	-0.093712	-0.087814
			14	0	0	0	-0.0205881	0		-0.0302217	0	0	0	0		-0.193941	-0.123478	-0.114864	-0.093712	-0.087814
			15	0	0	0	-0.0205881	0		-0.0302217	0	0	0	0		-0.193941	-0.123478	-0.114864	-0.093712	-0.087814
			16	0	0	0	-0.0205881	0		-0.0302217	0	0	0	0		-0.193941	-0.123478	-0.114864	-0.093712	-0.087814
			17	0	0	0	-0.0205881	0		-0.0302217	0	0	0	0		-0.193941	-0.123478	-0.114864	-0.093712	-0.087814
			18	0	0	0	-0.0205881	0		-0.0302217	0	0	0	0		-0.193941	-0.123478	-0.114864	-0.093712	-0.087814
			19	0	0	0	-0.0205881	0		-0.0302217	0	0	0	0		-0.193941	-0.123478	-0.114864	-0.093712	-0.087814
			20	10	10	10	10	10		10	10	10	10	10		10	10	10	10	10
			21	10	10	10	10	10		10	10	10	10	10		10	10	10	10	10
			22	10	10	10	10	10		10	10	10	10	10		10	10	10	10	10
			23	10	10	10	10	10		10	10	10	10	10		10	10	10	10	10
			24	10	10	10	10	10		10	10	10	10	10		10	10	10	10	10
	50		25	10	10	10	10	10		10	10	10	10	10		10	10	10	10	10
			26	10	10	10	10	10		10	10	10	10	10		10	10	10	10	10
			27	0	0	0	0	0		0	0	0	0	0		0	0	0	0	0
			28	0	0	0	0	0		0	0	0	0	0		0	0	0	0	0
			29	0	0	0	0	0		0	0	0	0	0		0	0	0	0	0
			30	0	0	0	0	0		0	0	0	0	0		0	0	0	0	0
			31	0	0	0	0	0		0	0	0	0	0		0	0	0	0	0
			32	0	0	0	0	0		0	0	0	0	0		0	0	0	0	0
			33	0	0	0	0	0		0	0	0	0	0		0	0	0	0	0
			34	0	0	0	0	0		0	0	0	0	0		0	0	0	0	0
			35	0	0	0	0	0		0	0	0	0	0		0	0	0	0	0
			36	0	0	0	0	0		0	0	0	0	0		0	0	0	0	0
			37	0	0	0	0	0		-0.0623011	0	0	0	0		-0.0837875	-0.0398133	0	0	0
			38	0	0	0	0	0		-0.0623011	0	0	0	0		-0.0837875	-0.0398133	0	0	0
			39	0	0	0	0	0		-0.0722734	0	0	0	0		-0.100074	-0.0469995	0	0	0
			40	0	0	0	0	0		-0.0722734	0	0	0	0		-0.100074	-0.0469995	0	0	0
			41	0	0	0	0	0		-0.0722734	0	0	0	0		-0.100074	-0.0469995	0	0	0
			42	0	0	0	0	0		-0.0722734	0	0	0	0		-0.100074	-0.0469995	0	0	0
			43	0	0	0	0	0		-0.0722734	0	0	0	0		-0.100074	-0.0469995	0	0	0
			44	0	0	0	0	0		-0.0722734	0	0	0	0		-0.100074	-0.0469995	0	0	0
			45	10	10	10	10	10		10	10	10	10	10		10	10	10	10	10
			46	10	10	10	10	10		10	10	10	10	10		10	10	10	10	10
			47	10	10	10	10	10		10	10	10	10	10		10	10	10	10	10
			48	10	10	10	10	10		10	10	10	10	10		10	10	10	10	10
			49	10	10	10	10	10		10	10	10	10	10		10	10	10	10	10
			50	0	0	0	0	0		0	0	0	0	0		0	0	0	0	0
			51	0	0	0	0	0		0	0	0	0	0		0	0	0	0	0
			52	0	0	0	0	0		0	0	0	0	0		0	0	0	0	0
			53	0	0	0	0	0		0	0	0	0	0		0	0	0	0	0
			54	0	0	0	0	0		0	0	0	0	0		0	0	0	0	0
			55	10	10	10	10	10		10	10	10	10	10		10	10	10	10	10
			56	0	0	0	0	0		-0.079801	0	0	0	0		0	0	0	0	0
			57	0	0	0	0	0		-0.079801	0	0	0	0		0	0	0	0	0
			58	0	0	0	0	0		-0.079801	0	0	0	0		0	0	0	0	0
			59	0	0	0	0	0		-0.079801	0	0	0	0		0	0	0	0	0
			60	0	0	0	0	0		-0.079801	0	0	0	0		0	0	0	0	0
			61	0	0	0	0	0		-0.079801	0	0	0	0		0	0	0	0	0
			62	0	0	0	0	0		-0.079801	0	0	0	0		0	0	0	0	0
			63	10	10	10	10	10		10	10	10	10	10		10	10	10	10	10
			64	10	10	10	10	10		10	10	10	10	10		10	10	10	10	10
			65	0	0	0	0	0		0	0	0	0	0		0	0	0	0	0
			66	0	0	0	0	0		0	0	0	0	0		0	0	0	0	0
			67	0	0	0	0	0		0	0	0	0	0		0	0	0	0	0
			68	0	0	0	0	0		0	0	0	0	0		0	0	0	0	0
			69	0	0	0	0	0		0	0	0	0	0		0	0	0	0	0
			70	0	0	0	0	0		0	0	0	0	0		0	0	0	0	0
			71	0	0	0	0	0		0	0	0	0	0		0	0	0	0	0
			72	0	0	0	0	0		0	0	0	0	0		0	0	0	0	0
			73	0	0	0	0	0		0	0	0	0	0		0	0	0	0	0
			74	0	0	0	0	0		0	0	0	0	0		0	0	0	0	0
	100		75	0	0	0	0	0		0	0	0	0	0		0	0	0	0	0
			76	0	0	0	0	0		0	0	0	0	0		0	0	0	0	0
			77	0	0	0	0	0		0	0	0	0	0		0	0	0	0	0
			78	0	0	0	0	0		0	0	0	0	0		0	0	0	0	0
			79	0	0	0	0	0		0	0	0	0	0		0	0	0	0	0
			80	0	0	0	0	0		0	0	0	0	0		0	0	0	0	0
			81	0	0	0	0	0		0	0	0	0	0		0	0	0	0	0
			82	0	0	0	0	0		0	0	0	0	0		0	0	0	0	0
			83	0	0	0	0	0		0	0	0	0	0		0	0	0	0	0
			84	0	0	0	0	0		0	0	0	0	0		0	0	0	0	0
			85	0	0	0	0	0		0	0	0	0	0		0	0	0	0	0
			86	0	0	0	0	0		0	0	0	0	0		0	0	0	0	0
			87	0	0	0	0	0		0	0	0	0	0		0	0	0	0	0
			88	10	10	10	10	10		10	10	10	10	10		10	10	10	10	10
			89	10	10	10	10	10		10	10	10	10	10		10	10	10	10	10
			90	0	0	0	0	0		0	0	0	0	0		0	0	0	0	0
			91	0	0	0	0	0		0	0	0	0	0		0	0	0	0	0
			92	0	0	0	0	0		0	0	0	0	0		0	0	0	0	0
			93	0	0	0	0	0		0	0	0	0	0		0	0	0	0	0
			94	0	0	0	0	0		0	0	0	0	0		0	0	0	0	0
			95	0	0	0	0	0		0	0	0	0	0		0	0	0	0	0
			96	0	0	0	0	0		0	0	0	0	0		0	0	0	0	0
			97	0	0	0	0	0		0	0	0	0	0		0	0	0	0	0
			98	0	0	0	0	0		0	0	0	0	0		0	0	0	0	0
			99	0	0	0	0	0		0	0	0	0	0		0	0	0	0	0
			100	0	0	0	0	0		0	0	0	0	0		0	0	0	0	0
			101	0	0	0	0	0		0	0	0	0	0		0	0	0	0	0
			102	10	10	10	10	10		10	10	10	10	10		10	10	10	10	10
			103	0	0	0	0	0		0	0	0	0	0		0	0	0	0	0
			104	0	0	0	0	0		0	0	0	0	0		0	0	0	0	0
			105	0	0	0	0	0		0	0	0	0	0		0	0	0	0	0
			106	0	0	0	0	0		0	0	0	0	0		0	0	0	0	0
			107	0	0	0	0	0		0	0	0	0	0		0	0	0	0	0
			108	0	0	0	0	0		0	0	0	0	0		0	0	0	0	0
			109	0	0	0	0	0		0	0	0	0	0		0	0	0	0	0
			110	0	0	0	0	0		0	0	0	0	0		0	0	0	0	0
			111	0	0	0	0	0		0	0	0	0	0		0	0	0	0	0
			112	0	0	0	0	0		0	0	0	0	0		0	0	0	0	0
			113	10	10	10	10	10		10	10	10	10	10		10	10	10	10	10
			114	10	10	10	10	10		10	10	10	10	10		10	10	10	10	10
			115	10	10	10	10	10		10	10	10	10	10		10	10	10	10	10
			116	10	10	10	10	10		10	10	10	10	10		10	10	10	10	10
			117	10	10	10	10	10		10	10	10	10	10		10	10	10	10	10
			118	10	10	10	10	10		10	10	10	10	10		10	10	10	10	10
			119	10	10	10	10	10		10	10	10	10	10		10	10	10	10	10
			120	10	10	10	10	10		10	10	10	10	10		10	10	10	10	10
			121	0	0	0	0	0		0	0	0	0	0		0	0	0	0	0
			122	0	0	0	0	0		0	0	0	0	0		0	0	0	0	0
			123	0	0	0	0	0		0	0	0	0	0		0	0	0	0	0
			124	0	0	0	0	0		0	0	0	0	0		0	0	0	0	0
	150		125	0	0	0	0	0		0	0	0	0	0		0	0	0	0	0
			126	0	0	0	0	0		0	0	0	0	0		0	0	0	0	0
			127	0	0	0	0	0		0	0	0	0	0		0	0	0	0	0
			128	0	0	0	0	0		0	0	0	0	0		0	0	0	0	0
			129	0	0	0	0	0		0	0	0	0	0		0	0	0	0	0
			130	0	0	0	0	0		0	0	0	0	0		0	0	0	0	0
			131	0	0	0	0	0		0	0	0	0	0		0	0	0	0	0
			132	0	0	0	0	0		0	0	0	0	0		0	0	0	0	0
			133	0	0	0	0	0		0	0	0	0	0		0	0	0	0	0
			134	0	0	0	0	0		0	0	0	0	0		0	0	0	0	0
			135	0	0	0	0	0		0	0	0	0	0		0	0	0	0	0
			136	0	0	0	0	0		0	0	0	0	0		0	0	0	0	0
			137	0	0	0	0	0		0	0	0	0	0		0	0	0	0	0
			138	0	0	0	0	0		0	0	0	0	0		0	0	0	0	0
			139	0	0	0	0	0		0	0	0	0	0		0	0	0	0	0
			140	0	0	0	0	0		0	0	0	0	0		0	0	0	0	0
			141	0	0	0	0	0		0	0	0	0	0		0	0	0	0	0
			142	0	0	0	0	0		0	0	0	0	0		0	0	0	0	0
			143	10	10	10	10	10		10	10	10	10	10		10	10	10	10	10
			144	10	10	10	10	10		10	10	10	10	10		10	10	10	10	10
			145	0	0	0	0	0		0	0	0	0	0		0	0	0	0	0
			146	0	0	0	0	0		0	0	0	0	0		0	0	0	0	0
			147	0	0	0	0	0		0	0	0	0	0		0	0	0	0	0
			148	0	0	0	0	0		0	0	0	0	0		0	0	0	0	0
			149	0	0	0	0	0		0	0	0	0	0		0	0	0	0	0
			150	0	0	0	0	0		0	0	0	0	0		0	0	0	0	0
			151	0	0	0	0	0		0	0	0	0	0		0	0	0	0	0
			152	0	0	0	0	0		0	0	0	0	0		0	0	0	0	0
			153	0	0	0	0	0		0	0	0	0	0		0	0	0	0	0
			154	0	0	0	0	0		0	0	0	0	0		0	0	0	0	0
			155	0	0	0	0	0		0	0	0	0	0		0	0	0	0	0
			156	0	0	0	0	0		0	0	0	0	0		0	0	0	0	0
			157	0	0	0	0	0		0	0	0	0	0		0	0	0	0	0
			158	0	0	0	0	0		0	0	0	0	0		0	0	0	0	0
			159	0	0	0	0	0		0	0	0	0	0		0	0	0	0	0
			160	10	10	10	10	10		10	10	10	10	10		10	10	10	10	10
			161	0	0	0	0	0		-0.138637	-0.103583	-0.0777702	-0.0514066	0		0	0	0	0	0
			162	0	0	0	0	0		-0.139774	-0.0977519	-0.073607	-0.0510123	-0.0176103		0	0	0	0	0
			163	0	0	0	0	0		-0.139774	-0.0977519	-0.073607	-0.0510123	-0.0176103		0	0	0	0	0
			164	0	0	0	0	0		-0.139101	-0.0871249	-0.0535841	-0.0365027	-0.0179728		0	0	0	0	0
			165	0	0	0	0	0		-0.138091	-0.0845469	-0.053033	-0.0364782	-0.0205564		0	0	0	0	0
			166	0	0	0	0	0		-0.138091	-0.0845469	-0.053033	-0.0364782	-0.0205564		0	0	0	0	0
			167	0	0	0	0	0		-0.138091	-0.0845469	-0.053033	-0.0364782	-0.0205564		0	0	0	0	0
			168	0	0	0	0	0		-0.13953	-0.0830055	-0.0492008	-0.0336885	-0.0246677		0	0	0	0	0
			169	0	0	0	0	0		-0.130004	-0.0725235	-0.0542193	-0.0386854	-0.0411128		0	0	0	0	0
			170	0	0	0	0	0		-0.130004	-0.0725235	-0.0542193	-0.0386854	-0.0411128		0	0	0	0	0
			171	0	0	0	0	0		-0.110337	-0.0438266	-0.032459	-0.0219441	-0.0235025		0	0	0	0	0
			172	0	0	0	0	0		-0.110337	-0.0438266	-0.032459	-0.0219441	-0.0235025		0	0	0	0	0
			173	0	0	0	0	0		-0.110337	-0.0438266	-0.032459	-0.0219441	-0.0235025		0	0	0	0	0
			174	0	0	0	0	0		-0.110337	-0.0438266	-0.032459	-0.0219441	-0.0235025		0	0	0	0	0
	200		175	0	0	0	0	0		-0.083049	0	0	0	0		0	0	0	0	0
			176	10	10	10	10	10		10	10	10	10	10		10	10	10	10	10
			177	0	0	0	0	0		0	-0.0242161	-0.0437726	-0.0524981	-0.06924		0	0	0	0	0
			178	0	0	0	0	0		0	-0.0242161	-0.0437726	-0.0524981	-0.06924		0	0	0	0	0
			179	0	0	0	0	0		0	-0.0121081	-0.0477567	-0.0542317	-0.0699995		0	0	0	0	0
			180	0	0	0	0	0		0	-0.0121081	-0.0477567	-0.0542317	-0.0699995		0	0	0	0	0
			181	0	0	0	0	0		0	-0.0194391	-0.0525265	-0.0585911	-0.07324		0	0	0	0	0
			182	0	0	0	0	0		0	-0.0145793	-0.052441	-0.0585513	-0.0719468		0	0	0	0	0
			183	0	0	0	0	0		0	-0.0116634	-0.0543799	-0.0593262	-0.0735455		0	0	0	0	0
			184	0	0	0	0	0		0	-0.0116634	-0.0543799	-0.0593262	-0.0735455		0	0	0	0	0
			185	0	0	0	0	0		0	-0.0116634	-0.0543799	-0.0593262	-0.0735455		0	0	0	0	0
			186	0	0	0	0	0		0	-0.0116634	-0.0543799	-0.0593262	-0.0735455		0	0	0	0	0
			187	0	0	0	0	0		0	-0.0145793	-0.0550397	-0.0601664	-0.0742421		0	0	0	0	0
			188	0	0	0	0	0		0	-0.0145793	-0.0550397	-0.0601664	-0.0742421		0	0	0	0	0
			189	0	0	0	0	0		0	-0.0145793	-0.0550397	-0.0601664	-0.0742421		0	0	0	0	0
			190	0	0	0	0	0		0	-0.0145793	-0.0550397	-0.0601664	-0.0742421		0	0	0	0	0
			191	10	10	10	10	10		10	10	10	10	10		10	10	10	10	10
			192	10	10	10	10	10		10	10	10	10	10		10	10	10	10	10
			193	10	10	10	10	10		10	10	10	10	10		10	10	10	10	10
			194	10	10	10	10	10		10	10	10	10	10		10	10	10	10	10
			195	0	0	0	0	0		0	0	0	0	0		0	0	0	0	0
			196	0	0	0	0	0		0	0	0	0	0		0	0	0	0	0
			197	0	0	0	0	0		0	0	0	0	0		0	0	0	0	0
			198	0	0	0	0	0		0	0	0	0	0		0	0	0	0	0
			199	0	0	0	0	0		0	0	0	0	0		0	0	0	0	0
			200	0	0	0	0	0		0	0	0	0	0		0	0	0	0	0
			201	0	0	0	0	0		0	0	0	0	0		0	0	0	0	0
			202	0	0	0	0	0		0	0	0	0	0		0	0	0	0	0
			203	0	0	0	0	0		0	0	0	0	0		0	0	0	0	0
			204	10	10	10	10	10		10	10	10	10	10		10	10	10	10	10
			205	10	10	10	10	10		10	10	10	10	10		10	10	10	10	10
			206	0	0	0	0	0		0	0	0	0	0		0	0	0	0	0
			207	0	0	0	0	0		0	0	0	0	0		0	0	0	0	0
			208	0	0	0	0	0		0	0	0	0	0		0	0	0	0	0
			209	0	0	0	0	0		0	0	0	0	0		0	0	0	0	0
			210	0	0	0	0	0		0	0	0	0	0		0	0	0	0	0
			211	0	0	0	0	0		0	0	0	0	0		0	0	0	0	0
			212	0	0	0	0	0		0	0	0	0	0		0	0	0	0	0
			213	0	0	0	0	0		0	0	0	0	0		0	0	0	0	0
			214	0	0	0	0	0		0	0	0	0	0		0	0	0	0	0
			215	0	0	0	0	0		0	0	0	0	0		0	0	0	0	0
			216	0	0	0	0	0		0	0	0	0	0		0	0	0	0	0
			217	0	0	0	0	0		0	0	0	0	0		0	0	0	0	0
			218	0	0	0	0	0		0	0	0	0	0		0	0	0	0	0
			219	0	0	0	0	0		0	0	0	0	0		0	0	0	0	0
			220	0	0	0	0	0		0	0	0	0	0		0	0	0	0	0
			221	0	0	0	0	0		0	0	0	0	0		0	0	0	0	0
			222	0	0	0	0	0		0	0	0	0	0		0	0	0	0	0
			223	0	0	0	0	0		0	0	0	0	0		0	0	0	0	0
			224	0	0	0	0	0		0	0	0	0	0		0	0	0	0	0
	250		225	0	0	0	0	0		0	0	0	0	0		0	0	0	0	0
			226	0	0	0	0	0		0	0	0	0	0		0	0	0	0	0
			227	0	0	0	0	0		0	0	0	0	0		0	0	0	0	0
			228	0	0	0	0	0		0	0	0	0	0		0	0	0	0	0
			229	0	0	0	0	0		0	0	0	0	0		0	0	0	0	0
			230	0	0	0	0	0		0	0	0	0	0		0	0	0	0	0
			231	0	0	0	0	0		0	0	0	0	0		0	0	0	0	0
			232	0	0	0	0	0		0	0	0	0	0		0	0	0	0	0
			233	0	0	0	0	0		0	0	0	0	0		0	0	0	0	0
			234	0	0	0	0	0		0	0	0	0	0		0	0	0	0	0
			235	0	0	0	0	0		0	0	0	0	0		0	0	0	0	0
			236	0	0	0	0	0		0	0	0	0	0		0	0	0	0	0
			237	10	10	10	10	10		10	10	10	10	10		10	10	10	10	10
			238	10	10	10	10	10		10	10	10	10	10		10	10	10	10	10
			239	0	0	0	0	0		0	0	0	0	0		0	0	0	0	0
			240	0	0	0	0	0		0	0	0	0	0		0	0	0	0	0
			241	0	0	0	0	0		0	0	0	0	0		0	0	0	0	0
			242	0	0	0	0	0		0	0	0	0	0		0	0	0	0	0
			243	0	0	0	0	0		0	0	0	0	0		0	0	0	0	0
			244	0	0	0	0	0		0	0	0	0	0		0	0	0	0	0
			245	0	0	0	0	0		0	0	0	0	0		0	0	0	0	0
			246	0	0	0	0	0		0	0	0	0	0		0	0	0	0	0
			247	10	10	10	10	10		10	10	10	10	10		10	10	10	10	10
			248	10	10	10	10	10		10	10	10	10	10		10	10	10	10	10
			249	0	0	0	0	0		0	0	0	0	0		0	0	0	0	0
			250	0	0	0	0	0		0	0	0	0	0		0	0	0	0	0
			251	0	0	0	0	0		0	0	0	0	0		0	0	0	0	0
			252	0	0	0	0	0		0	0	0	0	0		0	0	0	0	0
			253	0	0	0	0	0		0	0	0	0	0		0	0	0	0	0
			254	0	0	0	0	0		0	0	0	0	0		0	0	0	0	0
			255	0	0	0	0	0		0	0	0	0	0		0	0	0	0	0
			256	0	0	0	0	0		0	0	0	0	0		0	0	0	0	0
			257	0	0	0	0	0		0	0	0	0	0		0	0	0	0	0
			258	0	0	0	0	0		0	0	0	0	0		0	0	0	0	0
			259	0	0	0	0	0		0	0	0	0	0		0	0	0	0	0
			260	0	0	0	0	0		0	0	0	0	0		0	0	0	0	0
			261	0	0	0	0	0		0	0	0	0	0		0	0	0	0	0
			262	0	0	0	0	0		0	0	0	0	0		0	0	0	0	0
			263	0	0	0	0	0		0	0	0	0	0		0	0	0	0	0
			264	0	0	0	0	0		0	0	0	0	0		0	0	0	0	0
			265	0	0	0	0	0		0	0	0	0	0		0	0	0	0	0
			266	0	0	0	0	0		0	0	0	0	0		0	0	0	0	0
			267	0	0	0	0	0		0	0	0	0	0		0	0	0	0	0
			268	10	10	10	10	10		10	10	10	10	10		10	10	10	10	10
			269	10	10	10	10	10		10	10	10	10	10		10	10	10	10	10
			270	0	0	0	0	0		0	0	0	0	0		0	0	0	0	0
			271	0	0	0	0	0		0	0	0	0	0		0	0	0	0	0
			272	0	0	0	0	0		0	0	0	0	0		0	0	0	0	0
			273	0	0	0	0	0		0	0	0	0	0		0	0	0	0	0
			274	0	0	0	0	0		0	0	0	0	0		0	0	0	0	0
	300		275	0	0	0	0	0		0	0	0	0	0		0	0	0	0	0
			276	0	0	0	0	0		0	0	0	0	0		0	0	0	0	0
			277	0	0	0	0	0		0	0	0	0	0		0	0	0	0	0
			278	0	0	0	0	0		0	0	0	0	0		0	0	0	0	0
			279	10	10	10	10	10		10	10	10	10	10		10	10	10	10	10
			280	10	10	10	10	10		10	10	10	10	10		10	10	10	10	10
			281	10	10	10	10	10		10	10	10	10	10		10	10	10	10	10
			282	10	10	10	10	10		10	10	10	10	10		10	10	10	10	10
			283	10	10	10	10	10		10	10	10	10	10		10	10	10	10	10
			284	0	0	0	0	0		0	0	0	0	0		0	0	0	0	0
			285	0	0	0	0	0		0	0	0	0	0		0	0	0	0	0
			286	0	0	0	0	0		0	0	0	0	0		0	0	0	0	0
			287	0	0	0	0	0		0	0	0	0	0		0	0	0	0	0
			288	0	0	0	0	0		0	0	0	0	0		0	0	0	0	0
			289	0	0	0	0	0		0	0	0	0	0		0	0	0	0	0
			290	0	0	0	0	0		0	0	0	0	0		0	0	0	0	0
			291	0	0	0	0	0		0	0	0	0	0		0	0	0	0	0
			292	0	0	0	0	0		0	0	0	0	0		0	0	0	0	0
			293	10	10	10	10	10		10	10	10	10	10		10	10	10	10	10
			294	0	0	0	0	0		0	0	0	0	0		0	0	0	0	0
			295	0	0	0	0	0		0	0	0	0	0		0	0	0	0	0
			296	0	0	0	0	0		0	0	0	0	0		0	0	0	0	0
			297	0	0	0	0	0		0	0	0	0	0		0	0	0	0	0
			298	0	0	0	0	0		0	0	0	0	0		0	0	0	0	0
			299	0	0	0	0	0		0	0	0	0	0		0	0	0	0	0
			300	0	0	0	0	0		0	0	0	0	0		0	0	0	0	0
			301	0	0	0	0	0		0	0	0	0	0		0	0	0	0	0
			302	0	0	0	0	0		0	0	0	0	0		0	0	0	0	0
			303	0	0	0	0	0		0	0	0	0	0		0	0	0	0	0
			304	0	0	0	0	0		0	0	0	0	0		0	0	0	0	0
			305	0	0	0	0	0		0	0	0	0	0		0	0	0	0	0
			306	0	0	0	0	0		0	0	0	0	0		0	0	0	0	0
			307	0	0	0	0	0		0	0	0	0	0		0	0	0	0	0
			308	0	0	0	0	0		0	0	0	0	0		0	0	0	0	0
			309	0	0	0	0	0		0	0	0	0	0		0	0	0	0	0
			310	0	0	0	0	0		0	0	0	0	0		0	0	0	0	0
			311	0	0	0	0	0		0	0	0	0	0		0	0	0	0	0
			312	0	0	0	0	0		0	0	0	0	0		0	0	0	0	0
			313	0	0	0	0	0		0	0	0	0	0		0	0	0	0	0
			314	0	0	0	0	0		0	0	0	0	0		0	0	0	0	0
			315	0	0	0	0	0		0	0	0	0	0		0	0	0	0	0
			316	0	0	0	0	0		0	0	0	0	0		0	0	0	0	0
			317	0	0	0	0	0		0	0	0	0	0		0	0	0	0	0
			318	0	0	0	0	0		0	0	0	0	0		0	0	0	0	0
			319	0	0	0	0	0		0	0	0	0	0		0	0	0	0	0
			320	0	0	0	0	0		0	0	0	0	0		0	0	0	0	0
			321	0	0	0	0	0		0	0	0	0	0		0	0	0	0	0
			322	0	0	0	0	0		0	0	0	0	0		0	0	0	0	0
			323	10	10	10	10	10		10	10	10	10	10		10	10	10	10	10
			324	10	10	10	10	10		10	10	10	10	10		10	10	10	10	10
	350		325	10	10	10	10	10		10	10	10	10	10		10	10	10	10	10
			326	10	10	10	10	10		10	10	10	10	10		10	10	10	10	10
			327	10	10	10	10	10		10	10	10	10	10		10	10	10	10	10
			328	10	10	10	10	10		10	10	10	10	10		10	10	10	10	10
			329	0	0	0	0	0		0	0	0	0	0		0	0	0	0	0
			330	0	0	0	0	0		0	0	0	0	0		0	0	0	0	0
			331	0	0	0	0	0		0	0	0	0	0		0	0	0	0	0
			332	0	0	0	0	0		0	0	0	0	0		0	0	0	0	0
			333	0	0	0	0	0		0	0	0	0	0		0	0	0	0	0
			334	0	0	0	0	0		0	0	0	0	0		0	0	0	0	0
			335	0	0	0	0	0		0	0	0	0	0		0	0	0	0	0
			336	0	0	0	0	0		0	0	0	0	0		0	0	0	0	0
			337	0	0	0	0	0		0	0	0	0	0		0	0	0	0	0
			338	0	0	0	0	0		0	0	0	0	0		0	0	0	0	0
			339	0	0	0	0	0		0	0	0	0	0		0	0	0	0	0
			340	0	0	0	0	0		0	0	0	0	0		0	0	0	0	0
			341	0	0	0	0	0		0	0	0	0	0		0	0	0	0	0
			342	0	0	0	0	0		0	0	0	0	0		0	0	0	0	0
			343	0	0	0	0	0		0	0	0	0	0		0	0	0	0	0
			344	0	0	0	0	0		0	0	0	0	0		0	0	0	0	0
			345	0	0	0	0	0		0	0	0	0	0		0	0	0	0	0
			346	0	0	0	0	0		0	0	0	0	0		0	0	0	0	0
			347	0	0	0	0	0		0	0	0	0	0		0	0	0	0	0
			348	0	0	0	0	0		0	0	0	0	0		0	0	0	0	0
			349	0	0	0	0	0		0	0	0	0	0		0	0	0	0	0
			350	0	0	0	0	0		0	0	0	0	0		0	0	0	0	0
			351	0	0	0	0	0		0	0	0	0	0		0	0	0	0	0
			352	0	0	0	0	0		0	0	0	0	0		0	0	0	0	0
			353	0	0	0	0	0		0	0	0	0	0		0	0	0	0	0
			354	0	0	0	0	0		0	0	0	0	0		0	0	0	0	0
			355	0	0	0	0	0		0	0	0	0	0		0	0	0	0	0
			356	0	0	0	0	0		0	0	0	0	0		0	0	0	0	0
			357	0	0	0	0	0		0	0	0	0	0		0	0	0	0	0
			358	0	0	0	0	0		0	0	0	0	0		0	0	0	0	0
			359	10	10	10	10	10		10	10	10	10	10		10	10	10	10	10
			360	0	0	0	0	0		0	0	0	0	0		0	0	0	0	0
			361	0	0	0	0	0		0	0	0	0	0		0	0	0	0	0
			362	0	0	0	0	0		0	0	0	0	0		0	0	0	0	0
			363	0	0	0	0	0		0	0	0	0	0		0	0	0	0	0
			364	0	0	0	0	0		0	0	0	0	0		0	0	0	0	0
			365	10	10	10	10	10		10	10	10	10	10		10	10	10	10	10
			366	10	10	10	10	10		10	10	10	10	10		10	10	10	10	10
			367	10	10	10	10	10		10	10	10	10	10		10	10	10	10	10
			368	10	10	10	10	10		10	10	10	10	10		10	10	10	10	10
			369	10	10	10	10	10		10	10	10	10	10		10	10	10	10	10
			370	10	10	10	10	10		10	10	10	10	10		10	10	10	10	10
			371	0	0	0	0	0		0	0	0	0	0		0	0	0	0	0
			372	0	0	0	0	0		0	0	0	0	0		0	0	0	0	0
			373	0	0	0	0	0		0	0	0	0	0		0	0	0	0	0
			374	0	0	0	0	0		0	0	0	0	0		0	0	0	0	0
	400		375	0	0	0	0	0		0	0	0	0	0		0	0	0	0	0
			376	0	0	0	0	0		0	0	0	0	0		0	0	0	0	0
			377	0	0	0	0	0		0	0	0	0	0		0	0	0	0	0
			378	0	0	0	0	0		0	0	0	0	0		0	0	0	0	0
			379	0	0	0	0	0		0	0	0	0	0		0	0	0	0	0
			380	0	0	0	0	0		0	0	0	0	0		0	0	0	0	0
			381	0	0	0	0	0		0	0	0	0	0		0	0	0	0	0
			382	0	0	0	0	0		0	0	0	0	0		0	0	0	0	0
			383	0	0	0	0	0		0	0	0	0	0		0	0	0	0	0
			384	0	0	0	0	0		0	0	0	0	0		0	0	0	0	0
			385	0	0	0	0	0		0	0	0	0	0		0	0	0	0	0
			386	0	0	0	0	0		0	0	0	0	0		0	0	0	0	0
			387	0	0	0	0	0		0	0	0	0	0		0	0	0	0	0
			388	0	0	0	0	0		0	0	0	0	0		0	0	0	0	0
			389	0	0	0	0	0		0	0	0	0	0		0	0	0	0	0
			390	0	0	0	0	0		0	0	0	0	0		0	0	0	0	0
			391	0	0	0	0	0		0	0	0	0	0		0	0	0	0	0
			392	0	0	0	0	0		0	0	0	0	0		0	0	0	0	0
			393	10	10	10	10	10		10	10	10	10	10		10	10	10	10	10
			394	0	0	0	0	0		0	0	0	0	0		0	0	0	0	0
			395	0	0	0	0	0		0	0	0	0	0		0	0	0	0	0
			396	0	0	0	0	0		0	0	0	0	0		0	0	0	0	0
			397	0	0	0	0	0		0	0	0	0	0		0	0	0	0	0
			398	0	0	0	0	0		0	0	0	0	0		0	0	0	0	0
			399	0	0	0	0	0		0	0	0	0	0		0	0	0	0	0
			400	0	0	0	0	0		0	0	0	0	0		0	0	0	0	0
			401	0	0	0	0	0		0	0	0	0	0		0	0	0	0	0
			402	0	0	0	0	0		0	0	0	0	0		0	0	0	0	0
			403	0	0	0	0	0		0	0	0	0	0		0	0	0	0	0
			404	0	0	0	0	0		0	0	0	0	0		0	0	0	0	0
			405	0	0	0	0	0		0	0	0	0	0		0	0	0	0	0
			406	0	0	0	0	0		0	0	0	0	0		0	0	0	0	0
			407	0	0	0	0	0		0	0	0	0	0		0	0	0	0	0
			408	0	0	0	0	0		0	0	0	0	0		0	0	0	0	0
			409	0	0	0	0	0		0	0	0	0	0		0	0	0	0	0
			410	0	0	0	0	0		0	0	0	0	0		0	0	0	0	0
			411	0	0	0	0	0		0	0	0	0	0		0	0	0	0	0
			412	0	0	0	0	0		0	0	0	0	0		0	0	0	0	0
			413	0	0	0	0	0		0	0	0	0	0		0	0	0	0	0
			414	0	0	0	0	0		0	0	0	0	0		0	0	0	0	0
			415	0	0	0	0	0		0	0	0	0	0		0	0	0	0	0
			416	0	0	0	0	0		0	0	0	0	0		0	0	0	0	0
			417	0	0	0	0	0		0	0	0	0	0		0	0	0	0	0
			418	0	0	0	0	0		0	0	0	0	0		0	0	0	0	0
			419	0	0	0	0	0		0	0	0	0	0		0	0	0	0	0
			420	0	0	0	0	0		0	0	0	0	0		0	0	0	0	0
			421	0	0	0	0	0		0	0	0	0	0		0	0	0	0	0
			422	0	0	0	0	0		0	0	0	0	0		0	0	0	0	0
			423	0	0	0	0	0		0	0	0	0	0		0	0	0	0	0
			424	0	0	0	0	0		0	0	0	0	0		0	0	0	0	0
			425	0	0	0	0	0		0	0	0	0	0		0	0	0	0	0
			426	0	0	0	0	0		0	0	0	0	0		0	0	0	0	0
			427	0	0	0	0	0		0	0	0	0	0		0	0	0	0	0
			428	0	0	0	0	0		0	0	0	0	0		0	0	0	0	0
			429	10	10	10	10	10		10	10	10	10	10		10	10	10	10	10
			430	10	10	10	10	10		10	10	10	10	10		10	10	10	10	10
			431	0	0	0	0	0		0	0	0	0	0		0	0	0	0	0
			432	0	0	0	0	0		0	0	0	0	0		0	0	0	0	0
			433	0	0	0	0	0		0	0	0	0	0		0	0	0	0	0
			434	0	0	0	0	0		0	0	0	0	0		0	0	0	0	0
			435	0	0	0	0	0		0	0	0	0	0		0	0	0	0	0
			436	0	0	0	0	0		0	0	0	0	0		0	0	0	0	0
			437	10	10	10	10	10		10	10	10	10	10		10	10	10	10	10
			438	10	10	10	10	10		10	10	10	10	10		10	10	10	10	10
			439	10	10	10	10	10		10	10	10	10	10		10	10	10	10	10
			440	10	10	10	10	10		10	10	10	10	10		10	10	10	10	10
			441	10	10	10	10	10		10	10	10	10	10		10	10	10	10	10
			442	0	0	0	0	0		0	0	0	0	0		0	0	0	0	0
			443	0	0	0	0	0		0	0	0	0	0		0	0	0	0	0
			444	0	0	0	0	0		0	0	0	0	0		0	0	0	0	0
			445	0	0	0	0	0		0	0	0	0	0		0	0	0	0	0
			446	0	0	0	0	0		0	0	0	0	0		0	0	0	0	0
			447	0	0	0	0	0		0	0	0	0	0		0	0	0	0	0
			448	|	|	|	|	|		|	|	|	|	|		|	|	|	|	|
			449	1	5	15	30	60		1	5	15	30	60		1	5	15	30	60
				Labelling time (min)						Labelling time (min)						Labelling time (min)
[truncated: 77 more columns]

## Sheet: DualDomain_Plots
																		Peptide fragment deuterium uptake curves from hydrogen-deuterium exchange for KDM7B PHD+JmjC with OC3 (red diamonds), OC9 (purple circles), H3[1-21]K4me3 (green up triangles) and DMSO (blue down triangles).

## Sheet: PHD_Peptides
																	No significant difference
																	0
																		-3.10862e-15	-0.017	-0.034	-0.051	-0.068	-0.085	-0.102	-0.119	-0.136	-0.153	-0.17	-0.187	-0.204	-0.221	-0.238	-0.255	-0.272	-0.289	-0.306	-0.323	-0.34	-0.357	-0.374	-0.391	-0.408	-0.425	-0.442	-0.459	-0.476	-0.493	-0.51	-0.527
Sequence	Start	End		H3[1-21]K4me3						OC9
ASVPVYCL	2	9		-0.545938	-0.941848	-0.933186	-0.620663	-0.207631		-0.777996	-1.3168	-1.4115	-1.19932	-1.13517
LCRLPYDVTRF	9	19		-0.355814	-0.257707	-0.484888	-0.503903	-0.252517		-1.76326	-1.29885	-1.19239	-1.01802	-0.755051
CRLPYDVTRF	10	19		-0.180318	-0.201768	-0.453962	-0.476184	-0.231		-1.40483	-0.998462	-0.920617	-0.799767	-0.595282
CRLPYDVTRFMIEC	10	23		-0.29621	-0.407745	-0.57389	-0.61583	-0.332403		-1.59068	-1.17779	-1.06611	-0.965402	-0.791259
RLPYDVTRF	11	19		-0.345416	-0.203513	-0.490468	-0.383235	-0.233326		-1.6257	-1.15806	-1.14062	-0.911733	-0.741938
PYDVTRF	13	19		0	0	0	0	0		-1.04934	-0.669942	-0.375031	-0.177439	0
MCQDWFHGSC	25	34		0	0	0	0	0		-0.327292	-0.344358	-0.331401	-0.269908	0
CQDWFHGSC	26	34		0	0	0	0	0		-0.204721	0	0	0	0
CQDWFHGSCVG	26	36		0	0	0	0	0		0	0	0	0	0
DWFHGSC	28	34		0	0	0	0	0		0	0	0	0	0
WFHGSCVG	29	36		0	0	0	0	0		0	0	0	0	0
FHGSCVG	30	36		0	0	0	0	0		0	0	0	0	0
VGVEEEKAAD	35	44		0	0	-0.182583	-0.211012	0		-0.764203	-0.526196	-0.405374	-0.265431	0
GVEEEKAAD	36	44		0	0	-0.193871	0	0		-0.724778	-0.338478	-0.43472	-0.299348	0
VEEEKAAD	37	44		0	0	0	0	0		-0.715027	-0.449414	-0.238205	0	0
EEEKAAD	38	44		0	0	0	0	0		-0.630226	-0.378925	-0.241172	0	0
KAADIDL	41	47		0	0	0	0	0		-0.433251	-0.46754	-0.694419	-0.845059	-0.868109
YHCPNCE	48	54		0	0	0	0	0		0	0	0	0	0
YHCPNCEVL	48	56		0	0	0	0	0		0	0	0	-0.176976	-0.195406
EVLHGPSIM	54	62		0	0	0	0	0		0	0	0	0	0
VLHGPSIM	55	62		0	0	0	0	0		0	0	0	0	0
LHGPSIM	56	62		0	0	0	0	0		0	0	0	0	0
				|	|	|	|	|		|	|	|	|	|
				1	5	15	30	60		1	5	15	30	60
				Labelling time (min)						Labelling time (min)
[truncated: 69 more columns]

## Sheet: PHD_Residues
																				10	No coverage	0	-1.7434e-16	-0.0032	-0.0064	-0.0096	-0.0128	-0.016	-0.0192	-0.0224	-0.0256	-0.0288	-0.032	-0.0352	-0.0384	-0.0416	-0.0448	-0.048	-0.0512	-0.0544	-0.0576	-0.0608	-0.064	-0.0672	-0.0704	-0.0736	-0.0768	-0.08	-0.0832
																					No significant difference
				PHD							PHD
				H31-21K4me3							OC9
	1
																						0
Residue			1	10	10	10	10	10			10	10	10	10	10
			2	10	10	10	10	10			10	10	10	10	10
			3	10	10	10	10	10			10	10	10	10	10
			4	-0.109188	-0.18837	-0.186637	-0.124133	-0.0415262			-0.155599	-0.26336	-0.282301	-0.239863	-0.227033
			5	-0.109188	-0.18837	-0.186637	-0.124133	-0.0415262			-0.155599	-0.26336	-0.282301	-0.239863	-0.227033
			6	-0.109188	-0.18837	-0.186637	-0.124133	-0.0415262			-0.155599	-0.26336	-0.282301	-0.239863	-0.227033
			7	-0.109188	-0.18837	-0.186637	-0.124133	-0.0415262			-0.155599	-0.26336	-0.282301	-0.239863	-0.227033
			8	-0.109188	-0.18837	-0.186637	-0.124133	-0.0415262			-0.155599	-0.26336	-0.282301	-0.239863	-0.227033
			9	-0.109188	-0.18837	-0.186637	-0.124133	-0.0415262			-0.155599	-0.26336	-0.282301	-0.239863	-0.227033
			10	10	10	10	10	10			10	10	10	10	10
			11	-0.0444768	-0.0322134	-0.060611	-0.0629879	-0.0315646			-0.220408	-0.162356	-0.149048	-0.127252	-0.0943814
			12	-0.0323882	-0.0327017	-0.0592115	-0.0623329	-0.0315944			-0.188569	-0.137355	-0.125828	-0.109756	-0.0837848
			13	-0.0386835	-0.033006	-0.0648448	-0.0627178	-0.0334177			-0.209164	-0.151269	-0.141897	-0.120306	-0.0937527
			14	-0.0386835	-0.033006	-0.0648448	-0.0627178	-0.0334177			-0.209164	-0.151269	-0.141897	-0.120306	-0.0937527
			15	-0.0309468	-0.0264048	-0.0518758	-0.0501742	-0.0267341			-0.219798	-0.154512	-0.132269	-0.105117	-0.0750021
			16	-0.0309468	-0.0264048	-0.0518758	-0.0501742	-0.0267341			-0.219798	-0.154512	-0.132269	-0.105117	-0.0750021
	20		17	-0.0309468	-0.0264048	-0.0518758	-0.0501742	-0.0267341			-0.219798	-0.154512	-0.132269	-0.105117	-0.0750021
			18	-0.0309468	-0.0264048	-0.0518758	-0.0501742	-0.0267341			-0.219798	-0.154512	-0.132269	-0.105117	-0.0750021
			19	-0.0309468	-0.0264048	-0.0518758	-0.0501742	-0.0267341			-0.219798	-0.154512	-0.132269	-0.105117	-0.0750021
			20	-0.0269282	-0.0370677	-0.0521718	-0.0559845	-0.0302185			-0.144608	-0.107072	-0.096919	-0.0877638	-0.0719326
			21	-0.0269282	-0.0370677	-0.0521718	-0.0559845	-0.0302185			-0.144608	-0.107072	-0.096919	-0.0877638	-0.0719326
			22	-0.0269282	-0.0370677	-0.0521718	-0.0559845	-0.0302185			-0.144608	-0.107072	-0.096919	-0.0877638	-0.0719326
			23	-0.0269282	-0.0370677	-0.0521718	-0.0559845	-0.0302185			-0.144608	-0.107072	-0.096919	-0.0877638	-0.0719326
			24	10	10	10	10	10			10	10	10	10	10
			25	10	10	10	10	10			10	10	10	10	10
			26	10	10	10	10	10			10	10	10	10	10
			27	0	0	0	0	0			-0.0409115	-0.0430447	-0.0414251	-0.0337385	0
			28	0	0	0	0	0			-0.0233858	-0.0143482	-0.0138084	-0.0112462	0
			29	0	0	0	0	0			-0.0233858	-0.0143482	-0.0138084	-0.0112462	0
			30	0	0	0	0	0			-0.0175393	-0.0107612	-0.0103563	-0.00843463	0
			31	0	0	0	0	0			-0.0140315	-0.00860895	-0.00828503	-0.0067477	0
			32	0	0	0	0	0			-0.0116929	-0.00717412	-0.00690419	-0.00562308	0
			33	0	0	0	0	0			-0.0116929	-0.00717412	-0.00690419	-0.00562308	0
			34	0	0	0	0	0			-0.0116929	-0.00717412	-0.00690419	-0.00562308	0
			35	0	0	0	0	0			0	0	0	0	0
			36	0	0	0	0	0			0	0	0	0	0
	40		37	0	0	-0.0228229	-0.0263765	0			-0.0955254	-0.0657745	-0.0506718	-0.0331789	0
			38	0	0	-0.0252594	-0.0131882	0			-0.0995325	-0.0570642	-0.0563873	-0.0379714	0
			39	0	0	-0.0168396	-0.00879217	0			-0.106079	-0.0630103	-0.0508251	-0.0253143	0
			40	0	0	-0.0126297	-0.00659412	0			-0.11107	-0.066204	-0.0501775	-0.0189857	0
			41	0	0	-0.0126297	-0.00659412	0			-0.11107	-0.066204	-0.0501775	-0.0189857	0
			42	0	0	-0.0126297	-0.00659412	0			-0.11107	-0.066204	-0.0501775	-0.0189857	0
			43	0	0	-0.0101037	-0.0052753	0			-0.106186	-0.0716648	-0.0679187	-0.0489909	-0.0347244
			44	0	0	-0.0101037	-0.0052753	0			-0.106186	-0.0716648	-0.0679187	-0.0489909	-0.0347244
			45	0	0	0	0	0			-0.0866502	-0.093508	-0.138884	-0.169012	-0.173622
			46	0	0	0	0	0			-0.0866502	-0.093508	-0.138884	-0.169012	-0.173622
			47	0	0	0	0	0			-0.0866502	-0.093508	-0.138884	-0.169012	-0.173622
			48	10	10	10	10	10			10	10	10	10	10
			49	10	10	10	10	10			10	10	10	10	10
			50	0	0	0	0	0			0	0	0	-0.014748	-0.0162838
			51	0	0	0	0	0			0	0	0	-0.014748	-0.0162838
			52	0	0	0	0	0			0	0	0	-0.014748	-0.0162838
			53	0	0	0	0	0			0	0	0	-0.014748	-0.0162838
			54	0	0	0	0	0			0	0	0	-0.014748	-0.0162838
			55	0	0	0	0	0			0	0	0	-0.029496	-0.0325677
			56	0	0	0	0	0			0	0	0	-0.014748	-0.0162838
	60		57	0	0	0	0	0			0	0	0	0	0
			58	0	0	0	0	0			0	0	0	0	0
			59	0	0	0	0	0			0	0	0	0	0
			60	0	0	0	0	0			0	0	0	0	0
			61	0	0	0	0	0			0	0	0	0	0
			62	0	0	0	0	0			0	0	0	0	0
			63	10	10	10	10	10			10	10	10	10	10
			64	10	10	10	10	10			10	10	10	10	10
			65	10	10	10	10	10			10	10	10	10	10
			66	|	|	|	|	|			|	|	|	|	|
			67	1	5	15	30	60			1	5	15	30	60
				Labelling time (min)							Labelling time (min)
[truncated: 75 more columns]

## Sheet: PHD_Plots
																Peptide fragment deuterium uptake curves from hydrogen-deuterium exchange for KDM7B PHD with OC9 (purple circles), H3[1-21]K4me3 (green up triangles) and DMSO (blue down triangles).

## Sheet: PyMOL_Factors
Residue	Residue_Number	DD_H3K4Me3_-_DMSO	DD_OC3_-_DMSO	DD_OC9_-_DMSO	PHD_H3K4Me3_-_DMSO	PHD_OC9_-_DMSO		DD_H3K4Me3_-_DMSO	DD_OC3_-_DMSO	DD_OC9_-_DMSO	PHD_H3K4Me3_-_DMSO	PHD_OC9_-_DMSO
M	1	10	10	10	10	10	create DD_H3K4Me3_-_DMSO, 3kv4	alter /DD_H3K4Me3_-_DMSO//A/1, b=10	alter /DD_OC3_-_DMSO//A/1, b=10	alter /DD_OC9_-_DMSO//A/1, b=10	alter /PHD_H3K4Me3_-_DMSO//A/1, b=10	alter /PHD_OC9_-_DMSO//A/1, b=10
A	2	10	10	10	10	10	create DD_OC3_-_DMSO, 3kv4	alter /DD_H3K4Me3_-_DMSO//A/2, b=10	alter /DD_OC3_-_DMSO//A/2, b=10	alter /DD_OC9_-_DMSO//A/2, b=10	alter /PHD_H3K4Me3_-_DMSO//A/2, b=10	alter /PHD_OC9_-_DMSO//A/2, b=10
S	3	10	10	10	10	10	create DD_OC9_-_DMSO, 3kv4	alter /DD_H3K4Me3_-_DMSO//A/3, b=10	alter /DD_OC3_-_DMSO//A/3, b=10	alter /DD_OC9_-_DMSO//A/3, b=10	alter /PHD_H3K4Me3_-_DMSO//A/3, b=10	alter /PHD_OC9_-_DMSO//A/3, b=10
V	4	-1	-1	-1	-1	-1	create PHD_H3K4Me3_-_DMSO, 3kv4	alter /DD_H3K4Me3_-_DMSO//A/4, b=-1	alter /DD_OC3_-_DMSO//A/4, b=-1	alter /DD_OC9_-_DMSO//A/4, b=-1	alter /PHD_H3K4Me3_-_DMSO//A/4, b=-1	alter /PHD_OC9_-_DMSO//A/4, b=-1
P	5	-1	-1	-1	-1	-1	create PHD_OC9_-_DMSO, 3kv4	alter /DD_H3K4Me3_-_DMSO//A/5, b=-1	alter /DD_OC3_-_DMSO//A/5, b=-1	alter /DD_OC9_-_DMSO//A/5, b=-1	alter /PHD_H3K4Me3_-_DMSO//A/5, b=-1	alter /PHD_OC9_-_DMSO//A/5, b=-1
V	6	-1	-1	-1	-1	-1		alter /DD_H3K4Me3_-_DMSO//A/6, b=-1	alter /DD_OC3_-_DMSO//A/6, b=-1	alter /DD_OC9_-_DMSO//A/6, b=-1	alter /PHD_H3K4Me3_-_DMSO//A/6, b=-1	alter /PHD_OC9_-_DMSO//A/6, b=-1
Y	7	-1	-1	-1	-1	-1		alter /DD_H3K4Me3_-_DMSO//A/7, b=-1	alter /DD_OC3_-_DMSO//A/7, b=-1	alter /DD_OC9_-_DMSO//A/7, b=-1	alter /PHD_H3K4Me3_-_DMSO//A/7, b=-1	alter /PHD_OC9_-_DMSO//A/7, b=-1
C	8	-1	-1	-1	-1	-1		alter /DD_H3K4Me3_-_DMSO//A/8, b=-1	alter /DD_OC3_-_DMSO//A/8, b=-1	alter /DD_OC9_-_DMSO//A/8, b=-1	alter /PHD_H3K4Me3_-_DMSO//A/8, b=-1	alter /PHD_OC9_-_DMSO//A/8, b=-1
L	9	-1	-1	-1	-1	-1		alter /DD_H3K4Me3_-_DMSO//A/9, b=-1	alter /DD_OC3_-_DMSO//A/9, b=-1	alter /DD_OC9_-_DMSO//A/9, b=-1	alter /PHD_H3K4Me3_-_DMSO//A/9, b=-1	alter /PHD_OC9_-_DMSO//A/9, b=-1
C	10	10	10	10	10	10		alter /DD_H3K4Me3_-_DMSO//A/10, b=10	alter /DD_OC3_-_DMSO//A/10, b=10	alter /DD_OC9_-_DMSO//A/10, b=10	alter /PHD_H3K4Me3_-_DMSO//A/10, b=10	alter /PHD_OC9_-_DMSO//A/10, b=10
R	11	-1	-1	-1	-1	-1		alter /DD_H3K4Me3_-_DMSO//A/11, b=-1	alter /DD_OC3_-_DMSO//A/11, b=-1	alter /DD_OC9_-_DMSO//A/11, b=-1	alter /PHD_H3K4Me3_-_DMSO//A/11, b=-1	alter /PHD_OC9_-_DMSO//A/11, b=-1
L	12	-1	-1	-1	-1	-1		alter /DD_H3K4Me3_-_DMSO//A/12, b=-1	alter /DD_OC3_-_DMSO//A/12, b=-1	alter /DD_OC9_-_DMSO//A/12, b=-1	alter /PHD_H3K4Me3_-_DMSO//A/12, b=-1	alter /PHD_OC9_-_DMSO//A/12, b=-1
P	13	-1	-1	-1	-1	-1		alter /DD_H3K4Me3_-_DMSO//A/13, b=-1	alter /DD_OC3_-_DMSO//A/13, b=-1	alter /DD_OC9_-_DMSO//A/13, b=-1	alter /PHD_H3K4Me3_-_DMSO//A/13, b=-1	alter /PHD_OC9_-_DMSO//A/13, b=-1
Y	14	-1	-1	-1	-1	-1		alter /DD_H3K4Me3_-_DMSO//A/14, b=-1	alter /DD_OC3_-_DMSO//A/14, b=-1	alter /DD_OC9_-_DMSO//A/14, b=-1	alter /PHD_H3K4Me3_-_DMSO//A/14, b=-1	alter /PHD_OC9_-_DMSO//A/14, b=-1
D	15	-1	-1	-1	-1	-1		alter /DD_H3K4Me3_-_DMSO//A/15, b=-1	alter /DD_OC3_-_DMSO//A/15, b=-1	alter /DD_OC9_-_DMSO//A/15, b=-1	alter /PHD_H3K4Me3_-_DMSO//A/15, b=-1	alter /PHD_OC9_-_DMSO//A/15, b=-1
V	16	-1	-1	-1	-1	-1		alter /DD_H3K4Me3_-_DMSO//A/16, b=-1	alter /DD_OC3_-_DMSO//A/16, b=-1	alter /DD_OC9_-_DMSO//A/16, b=-1	alter /PHD_H3K4Me3_-_DMSO//A/16, b=-1	alter /PHD_OC9_-_DMSO//A/16, b=-1
T	17	-1	-1	-1	-1	-1		alter /DD_H3K4Me3_-_DMSO//A/17, b=-1	alter /DD_OC3_-_DMSO//A/17, b=-1	alter /DD_OC9_-_DMSO//A/17, b=-1	alter /PHD_H3K4Me3_-_DMSO//A/17, b=-1	alter /PHD_OC9_-_DMSO//A/17, b=-1
R	18	-1	-1	-1	-1	-1		alter /DD_H3K4Me3_-_DMSO//A/18, b=-1	alter /DD_OC3_-_DMSO//A/18, b=-1	alter /DD_OC9_-_DMSO//A/18, b=-1	alter /PHD_H3K4Me3_-_DMSO//A/18, b=-1	alter /PHD_OC9_-_DMSO//A/18, b=-1
F	19	-1	-1	-1	-1	-1		alter /DD_H3K4Me3_-_DMSO//A/19, b=-1	alter /DD_OC3_-_DMSO//A/19, b=-1	alter /DD_OC9_-_DMSO//A/19, b=-1	alter /PHD_H3K4Me3_-_DMSO//A/19, b=-1	alter /PHD_OC9_-_DMSO//A/19, b=-1
M	20	10	10	10	-1	-1		alter /DD_H3K4Me3_-_DMSO//A/20, b=10	alter /DD_OC3_-_DMSO//A/20, b=10	alter /DD_OC9_-_DMSO//A/20, b=10	alter /PHD_H3K4Me3_-_DMSO//A/20, b=-1	alter /PHD_OC9_-_DMSO//A/20, b=-1
I	21	10	10	10	-1	-1		alter /DD_H3K4Me3_-_DMSO//A/21, b=10	alter /DD_OC3_-_DMSO//A/21, b=10	alter /DD_OC9_-_DMSO//A/21, b=10	alter /PHD_H3K4Me3_-_DMSO//A/21, b=-1	alter /PHD_OC9_-_DMSO//A/21, b=-1
E	22	10	10	10	-1	-1		alter /DD_H3K4Me3_-_DMSO//A/22, b=10	alter /DD_OC3_-_DMSO//A/22, b=10	alter /DD_OC9_-_DMSO//A/22, b=10	alter /PHD_H3K4Me3_-_DMSO//A/22, b=-1	alter /PHD_OC9_-_DMSO//A/22, b=-1
C	23	10	10	10	-1	-1		alter /DD_H3K4Me3_-_DMSO//A/23, b=10	alter /DD_OC3_-_DMSO//A/23, b=10	alter /DD_OC9_-_DMSO//A/23, b=10	alter /PHD_H3K4Me3_-_DMSO//A/23, b=-1	alter /PHD_OC9_-_DMSO//A/23, b=-1
D	24	10	10	10	10	10		alter /DD_H3K4Me3_-_DMSO//A/24, b=10	alter /DD_OC3_-_DMSO//A/24, b=10	alter /DD_OC9_-_DMSO//A/24, b=10	alter /PHD_H3K4Me3_-_DMSO//A/24, b=10	alter /PHD_OC9_-_DMSO//A/24, b=10
M	25	10	10	10	10	10		alter /DD_H3K4Me3_-_DMSO//A/25, b=10	alter /DD_OC3_-_DMSO//A/25, b=10	alter /DD_OC9_-_DMSO//A/25, b=10	alter /PHD_H3K4Me3_-_DMSO//A/25, b=10	alter /PHD_OC9_-_DMSO//A/25, b=10
C	26	10	10	10	10	10		alter /DD_H3K4Me3_-_DMSO//A/26, b=10	alter /DD_OC3_-_DMSO//A/26, b=10	alter /DD_OC9_-_DMSO//A/26, b=10	alter /PHD_H3K4Me3_-_DMSO//A/26, b=10	alter /PHD_OC9_-_DMSO//A/26, b=10
Q	27	0	0	0	0	-1		alter /DD_H3K4Me3_-_DMSO//A/27, b=0	alter /DD_OC3_-_DMSO//A/27, b=0	alter /DD_OC9_-_DMSO//A/27, b=0	alter /PHD_H3K4Me3_-_DMSO//A/27, b=0	alter /PHD_OC9_-_DMSO//A/27, b=-1
D	28	0	0	0	0	-1		alter /DD_H3K4Me3_-_DMSO//A/28, b=0	alter /DD_OC3_-_DMSO//A/28, b=0	alter /DD_OC9_-_DMSO//A/28, b=0	alter /PHD_H3K4Me3_-_DMSO//A/28, b=0	alter /PHD_OC9_-_DMSO//A/28, b=-1
W	29	0	0	0	0	-1		alter /DD_H3K4Me3_-_DMSO//A/29, b=0	alter /DD_OC3_-_DMSO//A/29, b=0	alter /DD_OC9_-_DMSO//A/29, b=0	alter /PHD_H3K4Me3_-_DMSO//A/29, b=0	alter /PHD_OC9_-_DMSO//A/29, b=-1
F	30	0	0	0	0	-1		alter /DD_H3K4Me3_-_DMSO//A/30, b=0	alter /DD_OC3_-_DMSO//A/30, b=0	alter /DD_OC9_-_DMSO//A/30, b=0	alter /PHD_H3K4Me3_-_DMSO//A/30, b=0	alter /PHD_OC9_-_DMSO//A/30, b=-1
H	31	0	0	0	0	-1		alter /DD_H3K4Me3_-_DMSO//A/31, b=0	alter /DD_OC3_-_DMSO//A/31, b=0	alter /DD_OC9_-_DMSO//A/31, b=0	alter /PHD_H3K4Me3_-_DMSO//A/31, b=0	alter /PHD_OC9_-_DMSO//A/31, b=-1
G	32	0	0	0	0	-1		alter /DD_H3K4Me3_-_DMSO//A/32, b=0	alter /DD_OC3_-_DMSO//A/32, b=0	alter /DD_OC9_-_DMSO//A/32, b=0	alter /PHD_H3K4Me3_-_DMSO//A/32, b=0	alter /PHD_OC9_-_DMSO//A/32, b=-1
S	33	0	0	0	0	-1		alter /DD_H3K4Me3_-_DMSO//A/33, b=0	alter /DD_OC3_-_DMSO//A/33, b=0	alter /DD_OC9_-_DMSO//A/33, b=0	alter /PHD_H3K4Me3_-_DMSO//A/33, b=0	alter /PHD_OC9_-_DMSO//A/33, b=-1
C	34	0	0	0	0	-1		alter /DD_H3K4Me3_-_DMSO//A/34, b=0	alter /DD_OC3_-_DMSO//A/34, b=0	alter /DD_OC9_-_DMSO//A/34, b=0	alter /PHD_H3K4Me3_-_DMSO//A/34, b=0	alter /PHD_OC9_-_DMSO//A/34, b=-1
V	35	0	0	0	0	0		alter /DD_H3K4Me3_-_DMSO//A/35, b=0	alter /DD_OC3_-_DMSO//A/35, b=0	alter /DD_OC9_-_DMSO//A/35, b=0	alter /PHD_H3K4Me3_-_DMSO//A/35, b=0	alter /PHD_OC9_-_DMSO//A/35, b=0
G	36	0	0	0	0	0		alter /DD_H3K4Me3_-_DMSO//A/36, b=0	alter /DD_OC3_-_DMSO//A/36, b=0	alter /DD_OC9_-_DMSO//A/36, b=0	alter /PHD_H3K4Me3_-_DMSO//A/36, b=0	alter /PHD_OC9_-_DMSO//A/36, b=0
V	37	0	-1	-1	-1	-1		alter /DD_H3K4Me3_-_DMSO//A/37, b=0	alter /DD_OC3_-_DMSO//A/37, b=-1	alter /DD_OC9_-_DMSO//A/37, b=-1	alter /PHD_H3K4Me3_-_DMSO//A/37, b=-1	alter /PHD_OC9_-_DMSO//A/37, b=-1
E	38	0	-1	-1	-1	-1		alter /DD_H3K4Me3_-_DMSO//A/38, b=0	alter /DD_OC3_-_DMSO//A/38, b=-1	alter /DD_OC9_-_DMSO//A/38, b=-1	alter /PHD_H3K4Me3_-_DMSO//A/38, b=-1	alter /PHD_OC9_-_DMSO//A/38, b=-1
E	39	0	-1	-1	-1	-1		alter /DD_H3K4Me3_-_DMSO//A/39, b=0	alter /DD_OC3_-_DMSO//A/39, b=-1	alter /DD_OC9_-_DMSO//A/39, b=-1	alter /PHD_H3K4Me3_-_DMSO//A/39, b=-1	alter /PHD_OC9_-_DMSO//A/39, b=-1
E	40	0	-1	-1	-1	-1		alter /DD_H3K4Me3_-_DMSO//A/40, b=0	alter /DD_OC3_-_DMSO//A/40, b=-1	alter /DD_OC9_-_DMSO//A/40, b=-1	alter /PHD_H3K4Me3_-_DMSO//A/40, b=-1	alter /PHD_OC9_-_DMSO//A/40, b=-1
K	41	0	-1	-1	-1	-1		alter /DD_H3K4Me3_-_DMSO//A/41, b=0	alter /DD_OC3_-_DMSO//A/41, b=-1	alter /DD_OC9_-_DMSO//A/41, b=-1	alter /PHD_H3K4Me3_-_DMSO//A/41, b=-1	alter /PHD_OC9_-_DMSO//A/41, b=-1
A	42	0	-1	-1	-1	-1		alter /DD_H3K4Me3_-_DMSO//A/42, b=0	alter /DD_OC3_-_DMSO//A/42, b=-1	alter /DD_OC9_-_DMSO//A/42, b=-1	alter /PHD_H3K4Me3_-_DMSO//A/42, b=-1	alter /PHD_OC9_-_DMSO//A/42, b=-1
A	43	0	-1	-1	-1	-1		alter /DD_H3K4Me3_-_DMSO//A/43, b=0	alter /DD_OC3_-_DMSO//A/43, b=-1	alter /DD_OC9_-_DMSO//A/43, b=-1	alter /PHD_H3K4Me3_-_DMSO//A/43, b=-1	alter /PHD_OC9_-_DMSO//A/43, b=-1
D	44	0	-1	-1	-1	-1		alter /DD_H3K4Me3_-_DMSO//A/44, b=0	alter /DD_OC3_-_DMSO//A/44, b=-1	alter /DD_OC9_-_DMSO//A/44, b=-1	alter /PHD_H3K4Me3_-_DMSO//A/44, b=-1	alter /PHD_OC9_-_DMSO//A/44, b=-1
I	45	10	10	10	0	-1		alter /DD_H3K4Me3_-_DMSO//A/45, b=10	alter /DD_OC3_-_DMSO//A/45, b=10	alter /DD_OC9_-_DMSO//A/45, b=10	alter /PHD_H3K4Me3_-_DMSO//A/45, b=0	alter /PHD_OC9_-_DMSO//A/45, b=-1
D	46	10	10	10	0	-1		alter /DD_H3K4Me3_-_DMSO//A/46, b=10	alter /DD_OC3_-_DMSO//A/46, b=10	alter /DD_OC9_-_DMSO//A/46, b=10	alter /PHD_H3K4Me3_-_DMSO//A/46, b=0	alter /PHD_OC9_-_DMSO//A/46, b=-1
L	47	10	10	10	0	-1		alter /DD_H3K4Me3_-_DMSO//A/47, b=10	alter /DD_OC3_-_DMSO//A/47, b=10	alter /DD_OC9_-_DMSO//A/47, b=10	alter /PHD_H3K4Me3_-_DMSO//A/47, b=0	alter /PHD_OC9_-_DMSO//A/47, b=-1
Y	48	10	10	10	10	10		alter /DD_H3K4Me3_-_DMSO//A/48, b=10	alter /DD_OC3_-_DMSO//A/48, b=10	alter /DD_OC9_-_DMSO//A/48, b=10	alter /PHD_H3K4Me3_-_DMSO//A/48, b=10	alter /PHD_OC9_-_DMSO//A/48, b=10
H	49	10	10	10	10	10		alter /DD_H3K4Me3_-_DMSO//A/49, b=10	alter /DD_OC3_-_DMSO//A/49, b=10	alter /DD_OC9_-_DMSO//A/49, b=10	alter /PHD_H3K4Me3_-_DMSO//A/49, b=10	alter /PHD_OC9_-_DMSO//A/49, b=10
C	50	0	0	0	0	-1		alter /DD_H3K4Me3_-_DMSO//A/50, b=0	alter /DD_OC3_-_DMSO//A/50, b=0	alter /DD_OC9_-_DMSO//A/50, b=0	alter /PHD_H3K4Me3_-_DMSO//A/50, b=0	alter /PHD_OC9_-_DMSO//A/50, b=-1
P	51	0	0	0	0	-1		alter /DD_H3K4Me3_-_DMSO//A/51, b=0	alter /DD_OC3_-_DMSO//A/51, b=0	alter /DD_OC9_-_DMSO//A/51, b=0	alter /PHD_H3K4Me3_-_DMSO//A/51, b=0	alter /PHD_OC9_-_DMSO//A/51, b=-1
N	52	0	0	0	0	-1		alter /DD_H3K4Me3_-_DMSO//A/52, b=0	alter /DD_OC3_-_DMSO//A/52, b=0	alter /DD_OC9_-_DMSO//A/52, b=0	alter /PHD_H3K4Me3_-_DMSO//A/52, b=0	alter /PHD_OC9_-_DMSO//A/52, b=-1
C	53	0	0	0	0	-1		alter /DD_H3K4Me3_-_DMSO//A/53, b=0	alter /DD_OC3_-_DMSO//A/53, b=0	alter /DD_OC9_-_DMSO//A/53, b=0	alter /PHD_H3K4Me3_-_DMSO//A/53, b=0	alter /PHD_OC9_-_DMSO//A/53, b=-1
E	54	0	0	0	0	-1		alter /DD_H3K4Me3_-_DMSO//A/54, b=0	alter /DD_OC3_-_DMSO//A/54, b=0	alter /DD_OC9_-_DMSO//A/54, b=0	alter /PHD_H3K4Me3_-_DMSO//A/54, b=0	alter /PHD_OC9_-_DMSO//A/54, b=-1
V	55	10	10	10	0	-1		alter /DD_H3K4Me3_-_DMSO//A/55, b=10	alter /DD_OC3_-_DMSO//A/55, b=10	alter /DD_OC9_-_DMSO//A/55, b=10	alter /PHD_H3K4Me3_-_DMSO//A/55, b=0	alter /PHD_OC9_-_DMSO//A/55, b=-1
L	56	0	-1	0	0	-1		alter /DD_H3K4Me3_-_DMSO//A/56, b=0	alter /DD_OC3_-_DMSO//A/56, b=-1	alter /DD_OC9_-_DMSO//A/56, b=0	alter /PHD_H3K4Me3_-_DMSO//A/56, b=0	alter /PHD_OC9_-_DMSO//A/56, b=-1
H	57	0	-1	0	0	0		alter /DD_H3K4Me3_-_DMSO//A/57, b=0	alter /DD_OC3_-_DMSO//A/57, b=-1	alter /DD_OC9_-_DMSO//A/57, b=0	alter /PHD_H3K4Me3_-_DMSO//A/57, b=0	alter /PHD_OC9_-_DMSO//A/57, b=0
G	58	0	-1	0	0	0		alter /DD_H3K4Me3_-_DMSO//A/58, b=0	alter /DD_OC3_-_DMSO//A/58, b=-1	alter /DD_OC9_-_DMSO//A/58, b=0	alter /PHD_H3K4Me3_-_DMSO//A/58, b=0	alter /PHD_OC9_-_DMSO//A/58, b=0
P	59	0	-1	0	0	0		alter /DD_H3K4Me3_-_DMSO//A/59, b=0	alter /DD_OC3_-_DMSO//A/59, b=-1	alter /DD_OC9_-_DMSO//A/59, b=0	alter /PHD_H3K4Me3_-_DMSO//A/59, b=0	alter /PHD_OC9_-_DMSO//A/59, b=0
S	60	0	-1	0	0	0		alter /DD_H3K4Me3_-_DMSO//A/60, b=0	alter /DD_OC3_-_DMSO//A/60, b=-1	alter /DD_OC9_-_DMSO//A/60, b=0	alter /PHD_H3K4Me3_-_DMSO//A/60, b=0	alter /PHD_OC9_-_DMSO//A/60, b=0
I	61	0	-1	0	0	0		alter /DD_H3K4Me3_-_DMSO//A/61, b=0	alter /DD_OC3_-_DMSO//A/61, b=-1	alter /DD_OC9_-_DMSO//A/61, b=0	alter /PHD_H3K4Me3_-_DMSO//A/61, b=0	alter /PHD_OC9_-_DMSO//A/61, b=0
M	62	0	-1	0	0	0		alter /DD_H3K4Me3_-_DMSO//A/62, b=0	alter /DD_OC3_-_DMSO//A/62, b=-1	alter /DD_OC9_-_DMSO//A/62, b=0	alter /PHD_H3K4Me3_-_DMSO//A/62, b=0	alter /PHD_OC9_-_DMSO//A/62, b=0
K	63	10	10	10	10	10		alter /DD_H3K4Me3_-_DMSO//A/63, b=10	alter /DD_OC3_-_DMSO//A/63, b=10	alter /DD_OC9_-_DMSO//A/63, b=10	alter /PHD_H3K4Me3_-_DMSO//A/63, b=10	alter /PHD_OC9_-_DMSO//A/63, b=10
K	64	10	10	10	10	10		alter /DD_H3K4Me3_-_DMSO//A/64, b=10	alter /DD_OC3_-_DMSO//A/64, b=10	alter /DD_OC9_-_DMSO//A/64, b=10	alter /PHD_H3K4Me3_-_DMSO//A/64, b=10	alter /PHD_OC9_-_DMSO//A/64, b=10
R	65	0	0	0	10	10		alter /DD_H3K4Me3_-_DMSO//A/65, b=0	alter /DD_OC3_-_DMSO//A/65, b=0	alter /DD_OC9_-_DMSO//A/65, b=0	alter /PHD_H3K4Me3_-_DMSO//A/65, b=10	alter /PHD_OC9_-_DMSO//A/65, b=10
R	66	0	0	0				alter /DD_H3K4Me3_-_DMSO//A/66, b=0	alter /DD_OC3_-_DMSO//A/66, b=0	alter /DD_OC9_-_DMSO//A/66, b=0	alter /PHD_H3K4Me3_-_DMSO//A/66, b=	alter /PHD_OC9_-_DMSO//A/66, b=
G	67	0	0	0				alter /DD_H3K4Me3_-_DMSO//A/67, b=0	alter /DD_OC3_-_DMSO//A/67, b=0	alter /DD_OC9_-_DMSO//A/67, b=0	alter /PHD_H3K4Me3_-_DMSO//A/67, b=	alter /PHD_OC9_-_DMSO//A/67, b=
S	68	0	0	0				alter /DD_H3K4Me3_-_DMSO//A/68, b=0	alter /DD_OC3_-_DMSO//A/68, b=0	alter /DD_OC9_-_DMSO//A/68, b=0
S	69	0	0	0				alter /DD_H3K4Me3_-_DMSO//A/69, b=0	alter /DD_OC3_-_DMSO//A/69, b=0	alter /DD_OC9_-_DMSO//A/69, b=0
K	70	0	0	0				alter /DD_H3K4Me3_-_DMSO//A/70, b=0	alter /DD_OC3_-_DMSO//A/70, b=0	alter /DD_OC9_-_DMSO//A/70, b=0
G	71	0	0	0				alter /DD_H3K4Me3_-_DMSO//A/71, b=0	alter /DD_OC3_-_DMSO//A/71, b=0	alter /DD_OC9_-_DMSO//A/71, b=0
H	72	0	0	0				alter /DD_H3K4Me3_-_DMSO//A/72, b=0	alter /DD_OC3_-_DMSO//A/72, b=0	alter /DD_OC9_-_DMSO//A/72, b=0
D	73	0	0	0				alter /DD_H3K4Me3_-_DMSO//A/73, b=0	alter /DD_OC3_-_DMSO//A/73, b=0	alter /DD_OC9_-_DMSO//A/73, b=0
T	74	0	0	0				alter /DD_H3K4Me3_-_DMSO//A/74, b=0	alter /DD_OC3_-_DMSO//A/74, b=0	alter /DD_OC9_-_DMSO//A/74, b=0
H	75	0	0	0				alter /DD_H3K4Me3_-_DMSO//A/75, b=0	alter /DD_OC3_-_DMSO//A/75, b=0	alter /DD_OC9_-_DMSO//A/75, b=0
K	76	0	0	0				alter /DD_H3K4Me3_-_DMSO//A/76, b=0	alter /DD_OC3_-_DMSO//A/76, b=0	alter /DD_OC9_-_DMSO//A/76, b=0
G	77	0	0	0				alter /DD_H3K4Me3_-_DMSO//A/77, b=0	alter /DD_OC3_-_DMSO//A/77, b=0	alter /DD_OC9_-_DMSO//A/77, b=0
K	78	0	0	0				alter /DD_H3K4Me3_-_DMSO//A/78, b=0	alter /DD_OC3_-_DMSO//A/78, b=0	alter /DD_OC9_-_DMSO//A/78, b=0
P	79	0	0	0				alter /DD_H3K4Me3_-_DMSO//A/79, b=0	alter /DD_OC3_-_DMSO//A/79, b=0	alter /DD_OC9_-_DMSO//A/79, b=0
V	80	0	0	0				alter /DD_H3K4Me3_-_DMSO//A/80, b=0	alter /DD_OC3_-_DMSO//A/80, b=0	alter /DD_OC9_-_DMSO//A/80, b=0
K	81	0	0	0				alter /DD_H3K4Me3_-_DMSO//A/81, b=0	alter /DD_OC3_-_DMSO//A/81, b=0	alter /DD_OC9_-_DMSO//A/81, b=0
T	82	0	0	0				alter /DD_H3K4Me3_-_DMSO//A/82, b=0	alter /DD_OC3_-_DMSO//A/82, b=0	alter /DD_OC9_-_DMSO//A/82, b=0
G	83	0	0	0				alter /DD_H3K4Me3_-_DMSO//A/83, b=0	alter /DD_OC3_-_DMSO//A/83, b=0	alter /DD_OC9_-_DMSO//A/83, b=0
S	84	0	0	0				alter /DD_H3K4Me3_-_DMSO//A/84, b=0	alter /DD_OC3_-_DMSO//A/84, b=0	alter /DD_OC9_-_DMSO//A/84, b=0
P	85	0	0	0				alter /DD_H3K4Me3_-_DMSO//A/85, b=0	alter /DD_OC3_-_DMSO//A/85, b=0	alter /DD_OC9_-_DMSO//A/85, b=0
T	86	0	0	0				alter /DD_H3K4Me3_-_DMSO//A/86, b=0	alter /DD_OC3_-_DMSO//A/86, b=0	alter /DD_OC9_-_DMSO//A/86, b=0
F	87	0	0	0				alter /DD_H3K4Me3_-_DMSO//A/87, b=0	alter /DD_OC3_-_DMSO//A/87, b=0	alter /DD_OC9_-_DMSO//A/87, b=0
V	88	10	10	10				alter /DD_H3K4Me3_-_DMSO//A/88, b=10	alter /DD_OC3_-_DMSO//A/88, b=10	alter /DD_OC9_-_DMSO//A/88, b=10
R	89	10	10	10				alter /DD_H3K4Me3_-_DMSO//A/89, b=10	alter /DD_OC3_-_DMSO//A/89, b=10	alter /DD_OC9_-_DMSO//A/89, b=10
E	90	0	0	0				alter /DD_H3K4Me3_-_DMSO//A/90, b=0	alter /DD_OC3_-_DMSO//A/90, b=0	alter /DD_OC9_-_DMSO//A/90, b=0
L	91	0	0	0				alter /DD_H3K4Me3_-_DMSO//A/91, b=0	alter /DD_OC3_-_DMSO//A/91, b=0	alter /DD_OC9_-_DMSO//A/91, b=0
R	92	0	0	0				alter /DD_H3K4Me3_-_DMSO//A/92, b=0	alter /DD_OC3_-_DMSO//A/92, b=0	alter /DD_OC9_-_DMSO//A/92, b=0
S	93	0	0	0				alter /DD_H3K4Me3_-_DMSO//A/93, b=0	alter /DD_OC3_-_DMSO//A/93, b=0	alter /DD_OC9_-_DMSO//A/93, b=0
R	94	0	0	0				alter /DD_H3K4Me3_-_DMSO//A/94, b=0	alter /DD_OC3_-_DMSO//A/94, b=0	alter /DD_OC9_-_DMSO//A/94, b=0
T	95	0	0	0				alter /DD_H3K4Me3_-_DMSO//A/95, b=0	alter /DD_OC3_-_DMSO//A/95, b=0	alter /DD_OC9_-_DMSO//A/95, b=0
F	96	0	0	0				alter /DD_H3K4Me3_-_DMSO//A/96, b=0	alter /DD_OC3_-_DMSO//A/96, b=0	alter /DD_OC9_-_DMSO//A/96, b=0
D	97	0	0	0				alter /DD_H3K4Me3_-_DMSO//A/97, b=0	alter /DD_OC3_-_DMSO//A/97, b=0	alter /DD_OC9_-_DMSO//A/97, b=0
S	98	0	0	0				alter /DD_H3K4Me3_-_DMSO//A/98, b=0	alter /DD_OC3_-_DMSO//A/98, b=0	alter /DD_OC9_-_DMSO//A/98, b=0
S	99	0	0	0				alter /DD_H3K4Me3_-_DMSO//A/99, b=0	alter /DD_OC3_-_DMSO//A/99, b=0	alter /DD_OC9_-_DMSO//A/99, b=0
D	100	0	0	0				alter /DD_H3K4Me3_-_DMSO//A/100, b=0	alter /DD_OC3_-_DMSO//A/100, b=0	alter /DD_OC9_-_DMSO//A/100, b=0
E	101	0	0	0				alter /DD_H3K4Me3_-_DMSO//A/101, b=0	alter /DD_OC3_-_DMSO//A/101, b=0	alter /DD_OC9_-_DMSO//A/101, b=0
V	102	10	10	10				alter /DD_H3K4Me3_-_DMSO//A/102, b=10	alter /DD_OC3_-_DMSO//A/102, b=10	alter /DD_OC9_-_DMSO//A/102, b=10
I	103	0	0	0				alter /DD_H3K4Me3_-_DMSO//A/103, b=0	alter /DD_OC3_-_DMSO//A/103, b=0	alter /DD_OC9_-_DMSO//A/103, b=0
L	104	0	0	0				alter /DD_H3K4Me3_-_DMSO//A/104, b=0	alter /DD_OC3_-_DMSO//A/104, b=0	alter /DD_OC9_-_DMSO//A/104, b=0
K	105	0	0	0				alter /DD_H3K4Me3_-_DMSO//A/105, b=0	alter /DD_OC3_-_DMSO//A/105, b=0	alter /DD_OC9_-_DMSO//A/105, b=0
P	106	0	0	0				alter /DD_H3K4Me3_-_DMSO//A/106, b=0	alter /DD_OC3_-_DMSO//A/106, b=0	alter /DD_OC9_-_DMSO//A/106, b=0
T	107	0	0	0				alter /DD_H3K4Me3_-_DMSO//A/107, b=0	alter /DD_OC3_-_DMSO//A/107, b=0	alter /DD_OC9_-_DMSO//A/107, b=0
G	108	0	0	0				alter /DD_H3K4Me3_-_DMSO//A/108, b=0	alter /DD_OC3_-_DMSO//A/108, b=0	alter /DD_OC9_-_DMSO//A/108, b=0
N	109	0	0	0				alter /DD_H3K4Me3_-_DMSO//A/109, b=0	alter /DD_OC3_-_DMSO//A/109, b=0	alter /DD_OC9_-_DMSO//A/109, b=0
Q	110	0	0	0				alter /DD_H3K4Me3_-_DMSO//A/110, b=0	alter /DD_OC3_-_DMSO//A/110, b=0	alter /DD_OC9_-_DMSO//A/110, b=0
L	111	0	0	0				alter /DD_H3K4Me3_-_DMSO//A/111, b=0	alter /DD_OC3_-_DMSO//A/111, b=0	alter /DD_OC9_-_DMSO//A/111, b=0
T	112	0	0	0				alter /DD_H3K4Me3_-_DMSO//A/112, b=0	alter /DD_OC3_-_DMSO//A/112, b=0	alter /DD_OC9_-_DMSO//A/112, b=0
V	113	10	10	10				alter /DD_H3K4Me3_-_DMSO//A/113, b=10	alter /DD_OC3_-_DMSO//A/113, b=10	alter /DD_OC9_-_DMSO//A/113, b=10
E	114	10	10	10				alter /DD_H3K4Me3_-_DMSO//A/114, b=10	alter /DD_OC3_-_DMSO//A/114, b=10	alter /DD_OC9_-_DMSO//A/114, b=10
F	115	10	10	10				alter /DD_H3K4Me3_-_DMSO//A/115, b=10	alter /DD_OC3_-_DMSO//A/115, b=10	alter /DD_OC9_-_DMSO//A/115, b=10
L	116	10	10	10				alter /DD_H3K4Me3_-_DMSO//A/116, b=10	alter /DD_OC3_-_DMSO//A/116, b=10	alter /DD_OC9_-_DMSO//A/116, b=10
E	117	10	10	10				alter /DD_H3K4Me3_-_DMSO//A/117, b=10	alter /DD_OC3_-_DMSO//A/117, b=10	alter /DD_OC9_-_DMSO//A/117, b=10
E	118	10	10	10				alter /DD_H3K4Me3_-_DMSO//A/118, b=10	alter /DD_OC3_-_DMSO//A/118, b=10	alter /DD_OC9_-_DMSO//A/118, b=10
N	119	10	10	10				alter /DD_H3K4Me3_-_DMSO//A/119, b=10	alter /DD_OC3_-_DMSO//A/119, b=10	alter /DD_OC9_-_DMSO//A/119, b=10
S	120	10	10	10				alter /DD_H3K4Me3_-_DMSO//A/120, b=10	alter /DD_OC3_-_DMSO//A/120, b=10	alter /DD_OC9_-_DMSO//A/120, b=10
F	121	0	0	0				alter /DD_H3K4Me3_-_DMSO//A/121, b=0	alter /DD_OC3_-_DMSO//A/121, b=0	alter /DD_OC9_-_DMSO//A/121, b=0
S	122	0	0	0				alter /DD_H3K4Me3_-_DMSO//A/122, b=0	alter /DD_OC3_-_DMSO//A/122, b=0	alter /DD_OC9_-_DMSO//A/122, b=0
V	123	0	0	0				alter /DD_H3K4Me3_-_DMSO//A/123, b=0	alter /DD_OC3_-_DMSO//A/123, b=0	alter /DD_OC9_-_DMSO//A/123, b=0
P	124	0	0	0				alter /DD_H3K4Me3_-_DMSO//A/124, b=0	alter /DD_OC3_-_DMSO//A/124, b=0	alter /DD_OC9_-_DMSO//A/124, b=0
I	125	0	0	0				alter /DD_H3K4Me3_-_DMSO//A/125, b=0	alter /DD_OC3_-_DMSO//A/125, b=0	alter /DD_OC9_-_DMSO//A/125, b=0
L	126	0	0	0				alter /DD_H3K4Me3_-_DMSO//A/126, b=0	alter /DD_OC3_-_DMSO//A/126, b=0	alter /DD_OC9_-_DMSO//A/126, b=0
V	127	0	0	0				alter /DD_H3K4Me3_-_DMSO//A/127, b=0	alter /DD_OC3_-_DMSO//A/127, b=0	alter /DD_OC9_-_DMSO//A/127, b=0
L	128	0	0	0				alter /DD_H3K4Me3_-_DMSO//A/128, b=0	alter /DD_OC3_-_DMSO//A/128, b=0	alter /DD_OC9_-_DMSO//A/128, b=0
K	129	0	0	0				alter /DD_H3K4Me3_-_DMSO//A/129, b=0	alter /DD_OC3_-_DMSO//A/129, b=0	alter /DD_OC9_-_DMSO//A/129, b=0
K	130	0	0	0				alter /DD_H3K4Me3_-_DMSO//A/130, b=0	alter /DD_OC3_-_DMSO//A/130, b=0	alter /DD_OC9_-_DMSO//A/130, b=0
D	131	0	0	0				alter /DD_H3K4Me3_-_DMSO//A/131, b=0	alter /DD_OC3_-_DMSO//A/131, b=0	alter /DD_OC9_-_DMSO//A/131, b=0
G	132	0	0	0				alter /DD_H3K4Me3_-_DMSO//A/132, b=0	alter /DD_OC3_-_DMSO//A/132, b=0	alter /DD_OC9_-_DMSO//A/132, b=0
L	133	0	0	0				alter /DD_H3K4Me3_-_DMSO//A/133, b=0	alter /DD_OC3_-_DMSO//A/133, b=0	alter /DD_OC9_-_DMSO//A/133, b=0
G	134	0	0	0				alter /DD_H3K4Me3_-_DMSO//A/134, b=0	alter /DD_OC3_-_DMSO//A/134, b=0	alter /DD_OC9_-_DMSO//A/134, b=0
M	135	0	0	0				alter /DD_H3K4Me3_-_DMSO//A/135, b=0	alter /DD_OC3_-_DMSO//A/135, b=0	alter /DD_OC9_-_DMSO//A/135, b=0
T	136	0	0	0				alter /DD_H3K4Me3_-_DMSO//A/136, b=0	alter /DD_OC3_-_DMSO//A/136, b=0	alter /DD_OC9_-_DMSO//A/136, b=0
L	137	0	0	0				alter /DD_H3K4Me3_-_DMSO//A/137, b=0	alter /DD_OC3_-_DMSO//A/137, b=0	alter /DD_OC9_-_DMSO//A/137, b=0
P	138	0	0	0				alter /DD_H3K4Me3_-_DMSO//A/138, b=0	alter /DD_OC3_-_DMSO//A/138, b=0	alter /DD_OC9_-_DMSO//A/138, b=0
S	139	0	0	0				alter /DD_H3K4Me3_-_DMSO//A/139, b=0	alter /DD_OC3_-_DMSO//A/139, b=0	alter /DD_OC9_-_DMSO//A/139, b=0
P	140	0	0	0				alter /DD_H3K4Me3_-_DMSO//A/140, b=0	alter /DD_OC3_-_DMSO//A/140, b=0	alter /DD_OC9_-_DMSO//A/140, b=0
S	141	0	0	0				alter /DD_H3K4Me3_-_DMSO//A/141, b=0	alter /DD_OC3_-_DMSO//A/141, b=0	alter /DD_OC9_-_DMSO//A/141, b=0
F	142	0	0	0				alter /DD_H3K4Me3_-_DMSO//A/142, b=0	alter /DD_OC3_-_DMSO//A/142, b=0	alter /DD_OC9_-_DMSO//A/142, b=0
T	143	10	10	10				alter /DD_H3K4Me3_-_DMSO//A/143, b=10	alter /DD_OC3_-_DMSO//A/143, b=10	alter /DD_OC9_-_DMSO//A/143, b=10
V	144	10	10	10				alter /DD_H3K4Me3_-_DMSO//A/144, b=10	alter /DD_OC3_-_DMSO//A/144, b=10	alter /DD_OC9_-_DMSO//A/144, b=10
R	145	0	0	0				alter /DD_H3K4Me3_-_DMSO//A/145, b=0	alter /DD_OC3_-_DMSO//A/145, b=0	alter /DD_OC9_-_DMSO//A/145, b=0
D	146	0	0	0				alter /DD_H3K4Me3_-_DMSO//A/146, b=0	alter /DD_OC3_-_DMSO//A/146, b=0	alter /DD_OC9_-_DMSO//A/146, b=0
V	147	0	0	0				alter /DD_H3K4Me3_-_DMSO//A/147, b=0	alter /DD_OC3_-_DMSO//A/147, b=0	alter /DD_OC9_-_DMSO//A/147, b=0
E	148	0	0	0				alter /DD_H3K4Me3_-_DMSO//A/148, b=0	alter /DD_OC3_-_DMSO//A/148, b=0	alter /DD_OC9_-_DMSO//A/148, b=0
H	149	0	0	0				alter /DD_H3K4Me3_-_DMSO//A/149, b=0	alter /DD_OC3_-_DMSO//A/149, b=0	alter /DD_OC9_-_DMSO//A/149, b=0
Y	150	0	0	0				alter /DD_H3K4Me3_-_DMSO//A/150, b=0	alter /DD_OC3_-_DMSO//A/150, b=0	alter /DD_OC9_-_DMSO//A/150, b=0
V	151	0	0	0				alter /DD_H3K4Me3_-_DMSO//A/151, b=0	alter /DD_OC3_-_DMSO//A/151, b=0	alter /DD_OC9_-_DMSO//A/151, b=0
G	152	0	0	0				alter /DD_H3K4Me3_-_DMSO//A/152, b=0	alter /DD_OC3_-_DMSO//A/152, b=0	alter /DD_OC9_-_DMSO//A/152, b=0
S	153	0	0	0				alter /DD_H3K4Me3_-_DMSO//A/153, b=0	alter /DD_OC3_-_DMSO//A/153, b=0	alter /DD_OC9_-_DMSO//A/153, b=0
D	154	0	0	0				alter /DD_H3K4Me3_-_DMSO//A/154, b=0	alter /DD_OC3_-_DMSO//A/154, b=0	alter /DD_OC9_-_DMSO//A/154, b=0
K	155	0	0	0				alter /DD_H3K4Me3_-_DMSO//A/155, b=0	alter /DD_OC3_-_DMSO//A/155, b=0	alter /DD_OC9_-_DMSO//A/155, b=0
E	156	0	0	0				alter /DD_H3K4Me3_-_DMSO//A/156, b=0	alter /DD_OC3_-_DMSO//A/156, b=0	alter /DD_OC9_-_DMSO//A/156, b=0
I	157	0	0	0				alter /DD_H3K4Me3_-_DMSO//A/157, b=0	alter /DD_OC3_-_DMSO//A/157, b=0	alter /DD_OC9_-_DMSO//A/157, b=0
D	158	0	0	0				alter /DD_H3K4Me3_-_DMSO//A/158, b=0	alter /DD_OC3_-_DMSO//A/158, b=0	alter /DD_OC9_-_DMSO//A/158, b=0
V	159	0	0	0				alter /DD_H3K4Me3_-_DMSO//A/159, b=0	alter /DD_OC3_-_DMSO//A/159, b=0	alter /DD_OC9_-_DMSO//A/159, b=0
I	160	10	10	10				alter /DD_H3K4Me3_-_DMSO//A/160, b=10	alter /DD_OC3_-_DMSO//A/160, b=10	alter /DD_OC9_-_DMSO//A/160, b=10
D	161	0	-1	0				alter /DD_H3K4Me3_-_DMSO//A/161, b=0	alter /DD_OC3_-_DMSO//A/161, b=-1	alter /DD_OC9_-_DMSO//A/161, b=0
V	162	0	-1	0				alter /DD_H3K4Me3_-_DMSO//A/162, b=0	alter /DD_OC3_-_DMSO//A/162, b=-1	alter /DD_OC9_-_DMSO//A/162, b=0
T	163	0	-1	0				alter /DD_H3K4Me3_-_DMSO//A/163, b=0	alter /DD_OC3_-_DMSO//A/163, b=-1	alter /DD_OC9_-_DMSO//A/163, b=0
R	164	0	-1	0				alter /DD_H3K4Me3_-_DMSO//A/164, b=0	alter /DD_OC3_-_DMSO//A/164, b=-1	alter /DD_OC9_-_DMSO//A/164, b=0
Q	165	0	-1	0				alter /DD_H3K4Me3_-_DMSO//A/165, b=0	alter /DD_OC3_-_DMSO//A/165, b=-1	alter /DD_OC9_-_DMSO//A/165, b=0
A	166	0	-1	0				alter /DD_H3K4Me3_-_DMSO//A/166, b=0	alter /DD_OC3_-_DMSO//A/166, b=-1	alter /DD_OC9_-_DMSO//A/166, b=0
D	167	0	-1	0				alter /DD_H3K4Me3_-_DMSO//A/167, b=0	alter /DD_OC3_-_DMSO//A/167, b=-1	alter /DD_OC9_-_DMSO//A/167, b=0
C	168	0	-1	0				alter /DD_H3K4Me3_-_DMSO//A/168, b=0	alter /DD_OC3_-_DMSO//A/168, b=-1	alter /DD_OC9_-_DMSO//A/168, b=0
K	169	0	-1	0				alter /DD_H3K4Me3_-_DMSO//A/169, b=0	alter /DD_OC3_-_DMSO//A/169, b=-1	alter /DD_OC9_-_DMSO//A/169, b=0
M	170	0	-1	0				alter /DD_H3K4Me3_-_DMSO//A/170, b=0	alter /DD_OC3_-_DMSO//A/170, b=-1	alter /DD_OC9_-_DMSO//A/170, b=0
K	171	0	-1	0				alter /DD_H3K4Me3_-_DMSO//A/171, b=0	alter /DD_OC3_-_DMSO//A/171, b=-1	alter /DD_OC9_-_DMSO//A/171, b=0
L	172	0	-1	0				alter /DD_H3K4Me3_-_DMSO//A/172, b=0	alter /DD_OC3_-_DMSO//A/172, b=-1	alter /DD_OC9_-_DMSO//A/172, b=0
G	173	0	-1	0				alter /DD_H3K4Me3_-_DMSO//A/173, b=0	alter /DD_OC3_-_DMSO//A/173, b=-1	alter /DD_OC9_-_DMSO//A/173, b=0
D	174	0	-1	0				alter /DD_H3K4Me3_-_DMSO//A/174, b=0	alter /DD_OC3_-_DMSO//A/174, b=-1	alter /DD_OC9_-_DMSO//A/174, b=0
F	175	0	-1	0				alter /DD_H3K4Me3_-_DMSO//A/175, b=0	alter /DD_OC3_-_DMSO//A/175, b=-1	alter /DD_OC9_-_DMSO//A/175, b=0
V	176	10	10	10				alter /DD_H3K4Me3_-_DMSO//A/176, b=10	alter /DD_OC3_-_DMSO//A/176, b=10	alter /DD_OC9_-_DMSO//A/176, b=10
K	177	0	-1	0				alter /DD_H3K4Me3_-_DMSO//A/177, b=0	alter /DD_OC3_-_DMSO//A/177, b=-1	alter /DD_OC9_-_DMSO//A/177, b=0
Y	178	0	-1	0				alter /DD_H3K4Me3_-_DMSO//A/178, b=0	alter /DD_OC3_-_DMSO//A/178, b=-1	alter /DD_OC9_-_DMSO//A/178, b=0
Y	179	0	-1	0				alter /DD_H3K4Me3_-_DMSO//A/179, b=0	alter /DD_OC3_-_DMSO//A/179, b=-1	alter /DD_OC9_-_DMSO//A/179, b=0
Y	180	0	-1	0				alter /DD_H3K4Me3_-_DMSO//A/180, b=0	alter /DD_OC3_-_DMSO//A/180, b=-1	alter /DD_OC9_-_DMSO//A/180, b=0
S	181	0	-1	0				alter /DD_H3K4Me3_-_DMSO//A/181, b=0	alter /DD_OC3_-_DMSO//A/181, b=-1	alter /DD_OC9_-_DMSO//A/181, b=0
G	182	0	-1	0				alter /DD_H3K4Me3_-_DMSO//A/182, b=0	alter /DD_OC3_-_DMSO//A/182, b=-1	alter /DD_OC9_-_DMSO//A/182, b=0
K	183	0	-1	0				alter /DD_H3K4Me3_-_DMSO//A/183, b=0	alter /DD_OC3_-_DMSO//A/183, b=-1	alter /DD_OC9_-_DMSO//A/183, b=0
R	184	0	-1	0				alter /DD_H3K4Me3_-_DMSO//A/184, b=0	alter /DD_OC3_-_DMSO//A/184, b=-1	alter /DD_OC9_-_DMSO//A/184, b=0
E	185	0	-1	0				alter /DD_H3K4Me3_-_DMSO//A/185, b=0	alter /DD_OC3_-_DMSO//A/185, b=-1	alter /DD_OC9_-_DMSO//A/185, b=0
K	186	0	-1	0				alter /DD_H3K4Me3_-_DMSO//A/186, b=0	alter /DD_OC3_-_DMSO//A/186, b=-1	alter /DD_OC9_-_DMSO//A/186, b=0
V	187	0	-1	0				alter /DD_H3K4Me3_-_DMSO//A/187, b=0	alter /DD_OC3_-_DMSO//A/187, b=-1	alter /DD_OC9_-_DMSO//A/187, b=0
L	188	0	-1	0				alter /DD_H3K4Me3_-_DMSO//A/188, b=0	alter /DD_OC3_-_DMSO//A/188, b=-1	alter /DD_OC9_-_DMSO//A/188, b=0
N	189	0	-1	0				alter /DD_H3K4Me3_-_DMSO//A/189, b=0	alter /DD_OC3_-_DMSO//A/189, b=-1	alter /DD_OC9_-_DMSO//A/189, b=0
V	190	0	-1	0				alter /DD_H3K4Me3_-_DMSO//A/190, b=0	alter /DD_OC3_-_DMSO//A/190, b=-1	alter /DD_OC9_-_DMSO//A/190, b=0
I	191	10	10	10				alter /DD_H3K4Me3_-_DMSO//A/191, b=10	alter /DD_OC3_-_DMSO//A/191, b=10	alter /DD_OC9_-_DMSO//A/191, b=10
S	192	10	10	10				alter /DD_H3K4Me3_-_DMSO//A/192, b=10	alter /DD_OC3_-_DMSO//A/192, b=10	alter /DD_OC9_-_DMSO//A/192, b=10
L	193	10	10	10				alter /DD_H3K4Me3_-_DMSO//A/193, b=10	alter /DD_OC3_-_DMSO//A/193, b=10	alter /DD_OC9_-_DMSO//A/193, b=10
E	194	10	10	10				alter /DD_H3K4Me3_-_DMSO//A/194, b=10	alter /DD_OC3_-_DMSO//A/194, b=10	alter /DD_OC9_-_DMSO//A/194, b=10
F	195	0	0	0				alter /DD_H3K4Me3_-_DMSO//A/195, b=0	alter /DD_OC3_-_DMSO//A/195, b=0	alter /DD_OC9_-_DMSO//A/195, b=0
S	196	0	0	0				alter /DD_H3K4Me3_-_DMSO//A/196, b=0	alter /DD_OC3_-_DMSO//A/196, b=0	alter /DD_OC9_-_DMSO//A/196, b=0
D	197	0	0	0				alter /DD_H3K4Me3_-_DMSO//A/197, b=0	alter /DD_OC3_-_DMSO//A/197, b=0	alter /DD_OC9_-_DMSO//A/197, b=0
T	198	0	0	0				alter /DD_H3K4Me3_-_DMSO//A/198, b=0	alter /DD_OC3_-_DMSO//A/198, b=0	alter /DD_OC9_-_DMSO//A/198, b=0
R	199	0	0	0				alter /DD_H3K4Me3_-_DMSO//A/199, b=0	alter /DD_OC3_-_DMSO//A/199, b=0	alter /DD_OC9_-_DMSO//A/199, b=0
L	200	0	0	0				alter /DD_H3K4Me3_-_DMSO//A/200, b=0	alter /DD_OC3_-_DMSO//A/200, b=0	alter /DD_OC9_-_DMSO//A/200, b=0
S	201	0	0	0				alter /DD_H3K4Me3_-_DMSO//A/201, b=0	alter /DD_OC3_-_DMSO//A/201, b=0	alter /DD_OC9_-_DMSO//A/201, b=0
N	202	0	0	0				alter /DD_H3K4Me3_-_DMSO//A/202, b=0	alter /DD_OC3_-_DMSO//A/202, b=0	alter /DD_OC9_-_DMSO//A/202, b=0
L	203	0	0	0				alter /DD_H3K4Me3_-_DMSO//A/203, b=0	alter /DD_OC3_-_DMSO//A/203, b=0	alter /DD_OC9_-_DMSO//A/203, b=0
V	204	10	10	10				alter /DD_H3K4Me3_-_DMSO//A/204, b=10	alter /DD_OC3_-_DMSO//A/204, b=10	alter /DD_OC9_-_DMSO//A/204, b=10
E	205	10	10	10				alter /DD_H3K4Me3_-_DMSO//A/205, b=10	alter /DD_OC3_-_DMSO//A/205, b=10	alter /DD_OC9_-_DMSO//A/205, b=10
T	206	0	0	0				alter /DD_H3K4Me3_-_DMSO//A/206, b=0	alter /DD_OC3_-_DMSO//A/206, b=0	alter /DD_OC9_-_DMSO//A/206, b=0
P	207	0	0	0				alter /DD_H3K4Me3_-_DMSO//A/207, b=0	alter /DD_OC3_-_DMSO//A/207, b=0	alter /DD_OC9_-_DMSO//A/207, b=0
K	208	0	0	0				alter /DD_H3K4Me3_-_DMSO//A/208, b=0	alter /DD_OC3_-_DMSO//A/208, b=0	alter /DD_OC9_-_DMSO//A/208, b=0
I	209	0	0	0				alter /DD_H3K4Me3_-_DMSO//A/209, b=0	alter /DD_OC3_-_DMSO//A/209, b=0	alter /DD_OC9_-_DMSO//A/209, b=0
V	210	0	0	0				alter /DD_H3K4Me3_-_DMSO//A/210, b=0	alter /DD_OC3_-_DMSO//A/210, b=0	alter /DD_OC9_-_DMSO//A/210, b=0
R	211	0	0	0				alter /DD_H3K4Me3_-_DMSO//A/211, b=0	alter /DD_OC3_-_DMSO//A/211, b=0	alter /DD_OC9_-_DMSO//A/211, b=0
K	212	0	0	0				alter /DD_H3K4Me3_-_DMSO//A/212, b=0	alter /DD_OC3_-_DMSO//A/212, b=0	alter /DD_OC9_-_DMSO//A/212, b=0
L	213	0	0	0				alter /DD_H3K4Me3_-_DMSO//A/213, b=0	alter /DD_OC3_-_DMSO//A/213, b=0	alter /DD_OC9_-_DMSO//A/213, b=0
S	214	0	0	0				alter /DD_H3K4Me3_-_DMSO//A/214, b=0	alter /DD_OC3_-_DMSO//A/214, b=0	alter /DD_OC9_-_DMSO//A/214, b=0
W	215	0	0	0				alter /DD_H3K4Me3_-_DMSO//A/215, b=0	alter /DD_OC3_-_DMSO//A/215, b=0	alter /DD_OC9_-_DMSO//A/215, b=0
V	216	0	0	0				alter /DD_H3K4Me3_-_DMSO//A/216, b=0	alter /DD_OC3_-_DMSO//A/216, b=0	alter /DD_OC9_-_DMSO//A/216, b=0
E	217	0	0	0				alter /DD_H3K4Me3_-_DMSO//A/217, b=0	alter /DD_OC3_-_DMSO//A/217, b=0	alter /DD_OC9_-_DMSO//A/217, b=0
N	218	0	0	0				alter /DD_H3K4Me3_-_DMSO//A/218, b=0	alter /DD_OC3_-_DMSO//A/218, b=0	alter /DD_OC9_-_DMSO//A/218, b=0
L	219	0	0	0				alter /DD_H3K4Me3_-_DMSO//A/219, b=0	alter /DD_OC3_-_DMSO//A/219, b=0	alter /DD_OC9_-_DMSO//A/219, b=0
W	220	0	0	0				alter /DD_H3K4Me3_-_DMSO//A/220, b=0	alter /DD_OC3_-_DMSO//A/220, b=0	alter /DD_OC9_-_DMSO//A/220, b=0
P	221	0	0	0				alter /DD_H3K4Me3_-_DMSO//A/221, b=0	alter /DD_OC3_-_DMSO//A/221, b=0	alter /DD_OC9_-_DMSO//A/221, b=0
E	222	0	0	0				alter /DD_H3K4Me3_-_DMSO//A/222, b=0	alter /DD_OC3_-_DMSO//A/222, b=0	alter /DD_OC9_-_DMSO//A/222, b=0
E	223	0	0	0				alter /DD_H3K4Me3_-_DMSO//A/223, b=0	alter /DD_OC3_-_DMSO//A/223, b=0	alter /DD_OC9_-_DMSO//A/223, b=0
C	224	0	0	0				alter /DD_H3K4Me3_-_DMSO//A/224, b=0	alter /DD_OC3_-_DMSO//A/224, b=0	alter /DD_OC9_-_DMSO//A/224, b=0
V	225	0	0	0				alter /DD_H3K4Me3_-_DMSO//A/225, b=0	alter /DD_OC3_-_DMSO//A/225, b=0	alter /DD_OC9_-_DMSO//A/225, b=0
F	226	0	0	0				alter /DD_H3K4Me3_-_DMSO//A/226, b=0	alter /DD_OC3_-_DMSO//A/226, b=0	alter /DD_OC9_-_DMSO//A/226, b=0
E	227	0	0	0				alter /DD_H3K4Me3_-_DMSO//A/227, b=0	alter /DD_OC3_-_DMSO//A/227, b=0	alter /DD_OC9_-_DMSO//A/227, b=0
R	228	0	0	0				alter /DD_H3K4Me3_-_DMSO//A/228, b=0	alter /DD_OC3_-_DMSO//A/228, b=0	alter /DD_OC9_-_DMSO//A/228, b=0
P	229	0	0	0				alter /DD_H3K4Me3_-_DMSO//A/229, b=0	alter /DD_OC3_-_DMSO//A/229, b=0	alter /DD_OC9_-_DMSO//A/229, b=0
N	230	0	0	0				alter /DD_H3K4Me3_-_DMSO//A/230, b=0	alter /DD_OC3_-_DMSO//A/230, b=0	alter /DD_OC9_-_DMSO//A/230, b=0
V	231	0	0	0				alter /DD_H3K4Me3_-_DMSO//A/231, b=0	alter /DD_OC3_-_DMSO//A/231, b=0	alter /DD_OC9_-_DMSO//A/231, b=0
Q	232	0	0	0				alter /DD_H3K4Me3_-_DMSO//A/232, b=0	alter /DD_OC3_-_DMSO//A/232, b=0	alter /DD_OC9_-_DMSO//A/232, b=0
K	233	0	0	0				alter /DD_H3K4Me3_-_DMSO//A/233, b=0	alter /DD_OC3_-_DMSO//A/233, b=0	alter /DD_OC9_-_DMSO//A/233, b=0
Y	234	0	0	0				alter /DD_H3K4Me3_-_DMSO//A/234, b=0	alter /DD_OC3_-_DMSO//A/234, b=0	alter /DD_OC9_-_DMSO//A/234, b=0
C	235	0	0	0				alter /DD_H3K4Me3_-_DMSO//A/235, b=0	alter /DD_OC3_-_DMSO//A/235, b=0	alter /DD_OC9_-_DMSO//A/235, b=0
L	236	0	0	0				alter /DD_H3K4Me3_-_DMSO//A/236, b=0	alter /DD_OC3_-_DMSO//A/236, b=0	alter /DD_OC9_-_DMSO//A/236, b=0
M	237	10	10	10				alter /DD_H3K4Me3_-_DMSO//A/237, b=10	alter /DD_OC3_-_DMSO//A/237, b=10	alter /DD_OC9_-_DMSO//A/237, b=10
S	238	10	10	10				alter /DD_H3K4Me3_-_DMSO//A/238, b=10	alter /DD_OC3_-_DMSO//A/238, b=10	alter /DD_OC9_-_DMSO//A/238, b=10
V	239	0	0	0				alter /DD_H3K4Me3_-_DMSO//A/239, b=0	alter /DD_OC3_-_DMSO//A/239, b=0	alter /DD_OC9_-_DMSO//A/239, b=0
R	240	0	0	0				alter /DD_H3K4Me3_-_DMSO//A/240, b=0	alter /DD_OC3_-_DMSO//A/240, b=0	alter /DD_OC9_-_DMSO//A/240, b=0
D	241	0	0	0				alter /DD_H3K4Me3_-_DMSO//A/241, b=0	alter /DD_OC3_-_DMSO//A/241, b=0	alter /DD_OC9_-_DMSO//A/241, b=0
S	242	0	0	0				alter /DD_H3K4Me3_-_DMSO//A/242, b=0	alter /DD_OC3_-_DMSO//A/242, b=0	alter /DD_OC9_-_DMSO//A/242, b=0
Y	243	0	0	0				alter /DD_H3K4Me3_-_DMSO//A/243, b=0	alter /DD_OC3_-_DMSO//A/243, b=0	alter /DD_OC9_-_DMSO//A/243, b=0
T	244	0	0	0				alter /DD_H3K4Me3_-_DMSO//A/244, b=0	alter /DD_OC3_-_DMSO//A/244, b=0	alter /DD_OC9_-_DMSO//A/244, b=0
D	245	0	0	0				alter /DD_H3K4Me3_-_DMSO//A/245, b=0	alter /DD_OC3_-_DMSO//A/245, b=0	alter /DD_OC9_-_DMSO//A/245, b=0
F	246	0	0	0				alter /DD_H3K4Me3_-_DMSO//A/246, b=0	alter /DD_OC3_-_DMSO//A/246, b=0	alter /DD_OC9_-_DMSO//A/246, b=0
H	247	10	10	10				alter /DD_H3K4Me3_-_DMSO//A/247, b=10	alter /DD_OC3_-_DMSO//A/247, b=10	alter /DD_OC9_-_DMSO//A/247, b=10
I	248	10	10	10				alter /DD_H3K4Me3_-_DMSO//A/248, b=10	alter /DD_OC3_-_DMSO//A/248, b=10	alter /DD_OC9_-_DMSO//A/248, b=10
D	249	0	0	0				alter /DD_H3K4Me3_-_DMSO//A/249, b=0	alter /DD_OC3_-_DMSO//A/249, b=0	alter /DD_OC9_-_DMSO//A/249, b=0
F	250	0	0	0				alter /DD_H3K4Me3_-_DMSO//A/250, b=0	alter /DD_OC3_-_DMSO//A/250, b=0	alter /DD_OC9_-_DMSO//A/250, b=0
G	251	0	0	0				alter /DD_H3K4Me3_-_DMSO//A/251, b=0	alter /DD_OC3_-_DMSO//A/251, b=0	alter /DD_OC9_-_DMSO//A/251, b=0
G	252	0	0	0				alter /DD_H3K4Me3_-_DMSO//A/252, b=0	alter /DD_OC3_-_DMSO//A/252, b=0	alter /DD_OC9_-_DMSO//A/252, b=0
T	253	0	0	0				alter /DD_H3K4Me3_-_DMSO//A/253, b=0	alter /DD_OC3_-_DMSO//A/253, b=0	alter /DD_OC9_-_DMSO//A/253, b=0
S	254	0	0	0				alter /DD_H3K4Me3_-_DMSO//A/254, b=0	alter /DD_OC3_-_DMSO//A/254, b=0	alter /DD_OC9_-_DMSO//A/254, b=0
V	255	0	0	0				alter /DD_H3K4Me3_-_DMSO//A/255, b=0	alter /DD_OC3_-_DMSO//A/255, b=0	alter /DD_OC9_-_DMSO//A/255, b=0
W	256	0	0	0				alter /DD_H3K4Me3_-_DMSO//A/256, b=0	alter /DD_OC3_-_DMSO//A/256, b=0	alter /DD_OC9_-_DMSO//A/256, b=0
Y	257	0	0	0				alter /DD_H3K4Me3_-_DMSO//A/257, b=0	alter /DD_OC3_-_DMSO//A/257, b=0	alter /DD_OC9_-_DMSO//A/257, b=0
H	258	0	0	0				alter /DD_H3K4Me3_-_DMSO//A/258, b=0	alter /DD_OC3_-_DMSO//A/258, b=0	alter /DD_OC9_-_DMSO//A/258, b=0
V	259	0	0	0				alter /DD_H3K4Me3_-_DMSO//A/259, b=0	alter /DD_OC3_-_DMSO//A/259, b=0	alter /DD_OC9_-_DMSO//A/259, b=0
L	260	0	0	0				alter /DD_H3K4Me3_-_DMSO//A/260, b=0	alter /DD_OC3_-_DMSO//A/260, b=0	alter /DD_OC9_-_DMSO//A/260, b=0
K	261	0	0	0				alter /DD_H3K4Me3_-_DMSO//A/261, b=0	alter /DD_OC3_-_DMSO//A/261, b=0	alter /DD_OC9_-_DMSO//A/261, b=0
G	262	0	0	0				alter /DD_H3K4Me3_-_DMSO//A/262, b=0	alter /DD_OC3_-_DMSO//A/262, b=0	alter /DD_OC9_-_DMSO//A/262, b=0
E	263	0	0	0				alter /DD_H3K4Me3_-_DMSO//A/263, b=0	alter /DD_OC3_-_DMSO//A/263, b=0	alter /DD_OC9_-_DMSO//A/263, b=0
K	264	0	0	0				alter /DD_H3K4Me3_-_DMSO//A/264, b=0	alter /DD_OC3_-_DMSO//A/264, b=0	alter /DD_OC9_-_DMSO//A/264, b=0
I	265	0	0	0				alter /DD_H3K4Me3_-_DMSO//A/265, b=0	alter /DD_OC3_-_DMSO//A/265, b=0	alter /DD_OC9_-_DMSO//A/265, b=0
F	266	0	0	0				alter /DD_H3K4Me3_-_DMSO//A/266, b=0	alter /DD_OC3_-_DMSO//A/266, b=0	alter /DD_OC9_-_DMSO//A/266, b=0
Y	267	0	0	0				alter /DD_H3K4Me3_-_DMSO//A/267, b=0	alter /DD_OC3_-_DMSO//A/267, b=0	alter /DD_OC9_-_DMSO//A/267, b=0
L	268	10	10	10				alter /DD_H3K4Me3_-_DMSO//A/268, b=10	alter /DD_OC3_-_DMSO//A/268, b=10	alter /DD_OC9_-_DMSO//A/268, b=10
I	269	10	10	10				alter /DD_H3K4Me3_-_DMSO//A/269, b=10	alter /DD_OC3_-_DMSO//A/269, b=10	alter /DD_OC9_-_DMSO//A/269, b=10
R	270	0	0	0				alter /DD_H3K4Me3_-_DMSO//A/270, b=0	alter /DD_OC3_-_DMSO//A/270, b=0	alter /DD_OC9_-_DMSO//A/270, b=0
P	271	0	0	0				alter /DD_H3K4Me3_-_DMSO//A/271, b=0	alter /DD_OC3_-_DMSO//A/271, b=0	alter /DD_OC9_-_DMSO//A/271, b=0
T	272	0	0	0				alter /DD_H3K4Me3_-_DMSO//A/272, b=0	alter /DD_OC3_-_DMSO//A/272, b=0	alter /DD_OC9_-_DMSO//A/272, b=0
N	273	0	0	0				alter /DD_H3K4Me3_-_DMSO//A/273, b=0	alter /DD_OC3_-_DMSO//A/273, b=0	alter /DD_OC9_-_DMSO//A/273, b=0
A	274	0	0	0				alter /DD_H3K4Me3_-_DMSO//A/274, b=0	alter /DD_OC3_-_DMSO//A/274, b=0	alter /DD_OC9_-_DMSO//A/274, b=0
N	275	0	0	0				alter /DD_H3K4Me3_-_DMSO//A/275, b=0	alter /DD_OC3_-_DMSO//A/275, b=0	alter /DD_OC9_-_DMSO//A/275, b=0
L	276	0	0	0				alter /DD_H3K4Me3_-_DMSO//A/276, b=0	alter /DD_OC3_-_DMSO//A/276, b=0	alter /DD_OC9_-_DMSO//A/276, b=0
T	277	0	0	0				alter /DD_H3K4Me3_-_DMSO//A/277, b=0	alter /DD_OC3_-_DMSO//A/277, b=0	alter /DD_OC9_-_DMSO//A/277, b=0
L	278	0	0	0				alter /DD_H3K4Me3_-_DMSO//A/278, b=0	alter /DD_OC3_-_DMSO//A/278, b=0	alter /DD_OC9_-_DMSO//A/278, b=0
F	279	10	10	10				alter /DD_H3K4Me3_-_DMSO//A/279, b=10	alter /DD_OC3_-_DMSO//A/279, b=10	alter /DD_OC9_-_DMSO//A/279, b=10
E	280	10	10	10				alter /DD_H3K4Me3_-_DMSO//A/280, b=10	alter /DD_OC3_-_DMSO//A/280, b=10	alter /DD_OC9_-_DMSO//A/280, b=10
C	281	10	10	10				alter /DD_H3K4Me3_-_DMSO//A/281, b=10	alter /DD_OC3_-_DMSO//A/281, b=10	alter /DD_OC9_-_DMSO//A/281, b=10
W	282	10	10	10				alter /DD_H3K4Me3_-_DMSO//A/282, b=10	alter /DD_OC3_-_DMSO//A/282, b=10	alter /DD_OC9_-_DMSO//A/282, b=10
S	283	10	10	10				alter /DD_H3K4Me3_-_DMSO//A/283, b=10	alter /DD_OC3_-_DMSO//A/283, b=10	alter /DD_OC9_-_DMSO//A/283, b=10
S	284	0	0	0				alter /DD_H3K4Me3_-_DMSO//A/284, b=0	alter /DD_OC3_-_DMSO//A/284, b=0	alter /DD_OC9_-_DMSO//A/284, b=0
S	285	0	0	0				alter /DD_H3K4Me3_-_DMSO//A/285, b=0	alter /DD_OC3_-_DMSO//A/285, b=0	alter /DD_OC9_-_DMSO//A/285, b=0
S	286	0	0	0				alter /DD_H3K4Me3_-_DMSO//A/286, b=0	alter /DD_OC3_-_DMSO//A/286, b=0	alter /DD_OC9_-_DMSO//A/286, b=0
N	287	0	0	0				alter /DD_H3K4Me3_-_DMSO//A/287, b=0	alter /DD_OC3_-_DMSO//A/287, b=0	alter /DD_OC9_-_DMSO//A/287, b=0
Q	288	0	0	0				alter /DD_H3K4Me3_-_DMSO//A/288, b=0	alter /DD_OC3_-_DMSO//A/288, b=0	alter /DD_OC9_-_DMSO//A/288, b=0
N	289	0	0	0				alter /DD_H3K4Me3_-_DMSO//A/289, b=0	alter /DD_OC3_-_DMSO//A/289, b=0	alter /DD_OC9_-_DMSO//A/289, b=0
E	290	0	0	0				alter /DD_H3K4Me3_-_DMSO//A/290, b=0	alter /DD_OC3_-_DMSO//A/290, b=0	alter /DD_OC9_-_DMSO//A/290, b=0
M	291	0	0	0				alter /DD_H3K4Me3_-_DMSO//A/291, b=0	alter /DD_OC3_-_DMSO//A/291, b=0	alter /DD_OC9_-_DMSO//A/291, b=0
F	292	0	0	0				alter /DD_H3K4Me3_-_DMSO//A/292, b=0	alter /DD_OC3_-_DMSO//A/292, b=0	alter /DD_OC9_-_DMSO//A/292, b=0
F	293	10	10	10				alter /DD_H3K4Me3_-_DMSO//A/293, b=10	alter /DD_OC3_-_DMSO//A/293, b=10	alter /DD_OC9_-_DMSO//A/293, b=10
G	294	0	0	0				alter /DD_H3K4Me3_-_DMSO//A/294, b=0	alter /DD_OC3_-_DMSO//A/294, b=0	alter /DD_OC9_-_DMSO//A/294, b=0
D	295	0	0	0				alter /DD_H3K4Me3_-_DMSO//A/295, b=0	alter /DD_OC3_-_DMSO//A/295, b=0	alter /DD_OC9_-_DMSO//A/295, b=0
Q	296	0	0	0				alter /DD_H3K4Me3_-_DMSO//A/296, b=0	alter /DD_OC3_-_DMSO//A/296, b=0	alter /DD_OC9_-_DMSO//A/296, b=0
V	297	0	0	0				alter /DD_H3K4Me3_-_DMSO//A/297, b=0	alter /DD_OC3_-_DMSO//A/297, b=0	alter /DD_OC9_-_DMSO//A/297, b=0
D	298	0	0	0				alter /DD_H3K4Me3_-_DMSO//A/298, b=0	alter /DD_OC3_-_DMSO//A/298, b=0	alter /DD_OC9_-_DMSO//A/298, b=0
K	299	0	0	0				alter /DD_H3K4Me3_-_DMSO//A/299, b=0	alter /DD_OC3_-_DMSO//A/299, b=0	alter /DD_OC9_-_DMSO//A/299, b=0
C	300	0	0	0				alter /DD_H3K4Me3_-_DMSO//A/300, b=0	alter /DD_OC3_-_DMSO//A/300, b=0	alter /DD_OC9_-_DMSO//A/300, b=0
Y	301	0	0	0				alter /DD_H3K4Me3_-_DMSO//A/301, b=0	alter /DD_OC3_-_DMSO//A/301, b=0	alter /DD_OC9_-_DMSO//A/301, b=0
K	302	0	0	0				alter /DD_H3K4Me3_-_DMSO//A/302, b=0	alter /DD_OC3_-_DMSO//A/302, b=0	alter /DD_OC9_-_DMSO//A/302, b=0
C	303	0	0	0				alter /DD_H3K4Me3_-_DMSO//A/303, b=0	alter /DD_OC3_-_DMSO//A/303, b=0	alter /DD_OC9_-_DMSO//A/303, b=0
S	304	0	0	0				alter /DD_H3K4Me3_-_DMSO//A/304, b=0	alter /DD_OC3_-_DMSO//A/304, b=0	alter /DD_OC9_-_DMSO//A/304, b=0
V	305	0	0	0				alter /DD_H3K4Me3_-_DMSO//A/305, b=0	alter /DD_OC3_-_DMSO//A/305, b=0	alter /DD_OC9_-_DMSO//A/305, b=0
K	306	0	0	0				alter /DD_H3K4Me3_-_DMSO//A/306, b=0	alter /DD_OC3_-_DMSO//A/306, b=0	alter /DD_OC9_-_DMSO//A/306, b=0
Q	307	0	0	0				alter /DD_H3K4Me3_-_DMSO//A/307, b=0	alter /DD_OC3_-_DMSO//A/307, b=0	alter /DD_OC9_-_DMSO//A/307, b=0
G	308	0	0	0				alter /DD_H3K4Me3_-_DMSO//A/308, b=0	alter /DD_OC3_-_DMSO//A/308, b=0	alter /DD_OC9_-_DMSO//A/308, b=0
Q	309	0	0	0				alter /DD_H3K4Me3_-_DMSO//A/309, b=0	alter /DD_OC3_-_DMSO//A/309, b=0	alter /DD_OC9_-_DMSO//A/309, b=0
T	310	0	0	0				alter /DD_H3K4Me3_-_DMSO//A/310, b=0	alter /DD_OC3_-_DMSO//A/310, b=0	alter /DD_OC9_-_DMSO//A/310, b=0
L	311	0	0	0				alter /DD_H3K4Me3_-_DMSO//A/311, b=0	alter /DD_OC3_-_DMSO//A/311, b=0	alter /DD_OC9_-_DMSO//A/311, b=0
F	312	0	0	0				alter /DD_H3K4Me3_-_DMSO//A/312, b=0	alter /DD_OC3_-_DMSO//A/312, b=0	alter /DD_OC9_-_DMSO//A/312, b=0
I	313	0	0	0				alter /DD_H3K4Me3_-_DMSO//A/313, b=0	alter /DD_OC3_-_DMSO//A/313, b=0	alter /DD_OC9_-_DMSO//A/313, b=0
P	314	0	0	0				alter /DD_H3K4Me3_-_DMSO//A/314, b=0	alter /DD_OC3_-_DMSO//A/314, b=0	alter /DD_OC9_-_DMSO//A/314, b=0
T	315	0	0	0				alter /DD_H3K4Me3_-_DMSO//A/315, b=0	alter /DD_OC3_-_DMSO//A/315, b=0	alter /DD_OC9_-_DMSO//A/315, b=0
G	316	0	0	0				alter /DD_H3K4Me3_-_DMSO//A/316, b=0	alter /DD_OC3_-_DMSO//A/316, b=0	alter /DD_OC9_-_DMSO//A/316, b=0
W	317	0	0	0				alter /DD_H3K4Me3_-_DMSO//A/317, b=0	alter /DD_OC3_-_DMSO//A/317, b=0	alter /DD_OC9_-_DMSO//A/317, b=0
I	318	0	0	0				alter /DD_H3K4Me3_-_DMSO//A/318, b=0	alter /DD_OC3_-_DMSO//A/318, b=0	alter /DD_OC9_-_DMSO//A/318, b=0
H	319	0	0	0				alter /DD_H3K4Me3_-_DMSO//A/319, b=0	alter /DD_OC3_-_DMSO//A/319, b=0	alter /DD_OC9_-_DMSO//A/319, b=0
A	320	0	0	0				alter /DD_H3K4Me3_-_DMSO//A/320, b=0	alter /DD_OC3_-_DMSO//A/320, b=0	alter /DD_OC9_-_DMSO//A/320, b=0
V	321	0	0	0				alter /DD_H3K4Me3_-_DMSO//A/321, b=0	alter /DD_OC3_-_DMSO//A/321, b=0	alter /DD_OC9_-_DMSO//A/321, b=0
L	322	0	0	0				alter /DD_H3K4Me3_-_DMSO//A/322, b=0	alter /DD_OC3_-_DMSO//A/322, b=0	alter /DD_OC9_-_DMSO//A/322, b=0
T	323	10	10	10				alter /DD_H3K4Me3_-_DMSO//A/323, b=10	alter /DD_OC3_-_DMSO//A/323, b=10	alter /DD_OC9_-_DMSO//A/323, b=10
P	324	10	10	10				alter /DD_H3K4Me3_-_DMSO//A/324, b=10	alter /DD_OC3_-_DMSO//A/324, b=10	alter /DD_OC9_-_DMSO//A/324, b=10
V	325	10	10	10				alter /DD_H3K4Me3_-_DMSO//A/325, b=10	alter /DD_OC3_-_DMSO//A/325, b=10	alter /DD_OC9_-_DMSO//A/325, b=10
D	326	10	10	10				alter /DD_H3K4Me3_-_DMSO//A/326, b=10	alter /DD_OC3_-_DMSO//A/326, b=10	alter /DD_OC9_-_DMSO//A/326, b=10
C	327	10	10	10				alter /DD_H3K4Me3_-_DMSO//A/327, b=10	alter /DD_OC3_-_DMSO//A/327, b=10	alter /DD_OC9_-_DMSO//A/327, b=10
L	328	10	10	10				alter /DD_H3K4Me3_-_DMSO//A/328, b=10	alter /DD_OC3_-_DMSO//A/328, b=10	alter /DD_OC9_-_DMSO//A/328, b=10
A	329	0	0	0				alter /DD_H3K4Me3_-_DMSO//A/329, b=0	alter /DD_OC3_-_DMSO//A/329, b=0	alter /DD_OC9_-_DMSO//A/329, b=0
F	330	0	0	0				alter /DD_H3K4Me3_-_DMSO//A/330, b=0	alter /DD_OC3_-_DMSO//A/330, b=0	alter /DD_OC9_-_DMSO//A/330, b=0
G	331	0	0	0				alter /DD_H3K4Me3_-_DMSO//A/331, b=0	alter /DD_OC3_-_DMSO//A/331, b=0	alter /DD_OC9_-_DMSO//A/331, b=0
G	332	0	0	0				alter /DD_H3K4Me3_-_DMSO//A/332, b=0	alter /DD_OC3_-_DMSO//A/332, b=0	alter /DD_OC9_-_DMSO//A/332, b=0
N	333	0	0	0				alter /DD_H3K4Me3_-_DMSO//A/333, b=0	alter /DD_OC3_-_DMSO//A/333, b=0	alter /DD_OC9_-_DMSO//A/333, b=0
F	334	0	0	0				alter /DD_H3K4Me3_-_DMSO//A/334, b=0	alter /DD_OC3_-_DMSO//A/334, b=0	alter /DD_OC9_-_DMSO//A/334, b=0
L	335	0	0	0				alter /DD_H3K4Me3_-_DMSO//A/335, b=0	alter /DD_OC3_-_DMSO//A/335, b=0	alter /DD_OC9_-_DMSO//A/335, b=0
H	336	0	0	0				alter /DD_H3K4Me3_-_DMSO//A/336, b=0	alter /DD_OC3_-_DMSO//A/336, b=0	alter /DD_OC9_-_DMSO//A/336, b=0
S	337	0	0	0				alter /DD_H3K4Me3_-_DMSO//A/337, b=0	alter /DD_OC3_-_DMSO//A/337, b=0	alter /DD_OC9_-_DMSO//A/337, b=0
L	338	0	0	0				alter /DD_H3K4Me3_-_DMSO//A/338, b=0	alter /DD_OC3_-_DMSO//A/338, b=0	alter /DD_OC9_-_DMSO//A/338, b=0
N	339	0	0	0				alter /DD_H3K4Me3_-_DMSO//A/339, b=0	alter /DD_OC3_-_DMSO//A/339, b=0	alter /DD_OC9_-_DMSO//A/339, b=0
I	340	0	0	0				alter /DD_H3K4Me3_-_DMSO//A/340, b=0	alter /DD_OC3_-_DMSO//A/340, b=0	alter /DD_OC9_-_DMSO//A/340, b=0
E	341	0	0	0				alter /DD_H3K4Me3_-_DMSO//A/341, b=0	alter /DD_OC3_-_DMSO//A/341, b=0	alter /DD_OC9_-_DMSO//A/341, b=0
M	342	0	0	0				alter /DD_H3K4Me3_-_DMSO//A/342, b=0	alter /DD_OC3_-_DMSO//A/342, b=0	alter /DD_OC9_-_DMSO//A/342, b=0
Q	343	0	0	0				alter /DD_H3K4Me3_-_DMSO//A/343, b=0	alter /DD_OC3_-_DMSO//A/343, b=0	alter /DD_OC9_-_DMSO//A/343, b=0
L	344	0	0	0				alter /DD_H3K4Me3_-_DMSO//A/344, b=0	alter /DD_OC3_-_DMSO//A/344, b=0	alter /DD_OC9_-_DMSO//A/344, b=0
K	345	0	0	0				alter /DD_H3K4Me3_-_DMSO//A/345, b=0	alter /DD_OC3_-_DMSO//A/345, b=0	alter /DD_OC9_-_DMSO//A/345, b=0
A	346	0	0	0				alter /DD_H3K4Me3_-_DMSO//A/346, b=0	alter /DD_OC3_-_DMSO//A/346, b=0	alter /DD_OC9_-_DMSO//A/346, b=0
Y	347	0	0	0				alter /DD_H3K4Me3_-_DMSO//A/347, b=0	alter /DD_OC3_-_DMSO//A/347, b=0	alter /DD_OC9_-_DMSO//A/347, b=0
E	348	0	0	0				alter /DD_H3K4Me3_-_DMSO//A/348, b=0	alter /DD_OC3_-_DMSO//A/348, b=0	alter /DD_OC9_-_DMSO//A/348, b=0
I	349	0	0	0				alter /DD_H3K4Me3_-_DMSO//A/349, b=0	alter /DD_OC3_-_DMSO//A/349, b=0	alter /DD_OC9_-_DMSO//A/349, b=0
E	350	0	0	0				alter /DD_H3K4Me3_-_DMSO//A/350, b=0	alter /DD_OC3_-_DMSO//A/350, b=0	alter /DD_OC9_-_DMSO//A/350, b=0
K	351	0	0	0				alter /DD_H3K4Me3_-_DMSO//A/351, b=0	alter /DD_OC3_-_DMSO//A/351, b=0	alter /DD_OC9_-_DMSO//A/351, b=0
R	352	0	0	0				alter /DD_H3K4Me3_-_DMSO//A/352, b=0	alter /DD_OC3_-_DMSO//A/352, b=0	alter /DD_OC9_-_DMSO//A/352, b=0
L	353	0	0	0				alter /DD_H3K4Me3_-_DMSO//A/353, b=0	alter /DD_OC3_-_DMSO//A/353, b=0	alter /DD_OC9_-_DMSO//A/353, b=0
S	354	0	0	0				alter /DD_H3K4Me3_-_DMSO//A/354, b=0	alter /DD_OC3_-_DMSO//A/354, b=0	alter /DD_OC9_-_DMSO//A/354, b=0
T	355	0	0	0				alter /DD_H3K4Me3_-_DMSO//A/355, b=0	alter /DD_OC3_-_DMSO//A/355, b=0	alter /DD_OC9_-_DMSO//A/355, b=0
A	356	0	0	0				alter /DD_H3K4Me3_-_DMSO//A/356, b=0	alter /DD_OC3_-_DMSO//A/356, b=0	alter /DD_OC9_-_DMSO//A/356, b=0
D	357	0	0	0				alter /DD_H3K4Me3_-_DMSO//A/357, b=0	alter /DD_OC3_-_DMSO//A/357, b=0	alter /DD_OC9_-_DMSO//A/357, b=0
L	358	0	0	0				alter /DD_H3K4Me3_-_DMSO//A/358, b=0	alter /DD_OC3_-_DMSO//A/358, b=0	alter /DD_OC9_-_DMSO//A/358, b=0
F	359	10	10	10				alter /DD_H3K4Me3_-_DMSO//A/359, b=10	alter /DD_OC3_-_DMSO//A/359, b=10	alter /DD_OC9_-_DMSO//A/359, b=10
R	360	0	0	0				alter /DD_H3K4Me3_-_DMSO//A/360, b=0	alter /DD_OC3_-_DMSO//A/360, b=0	alter /DD_OC9_-_DMSO//A/360, b=0
F	361	0	0	0				alter /DD_H3K4Me3_-_DMSO//A/361, b=0	alter /DD_OC3_-_DMSO//A/361, b=0	alter /DD_OC9_-_DMSO//A/361, b=0
P	362	0	0	0				alter /DD_H3K4Me3_-_DMSO//A/362, b=0	alter /DD_OC3_-_DMSO//A/362, b=0	alter /DD_OC9_-_DMSO//A/362, b=0
N	363	0	0	0				alter /DD_H3K4Me3_-_DMSO//A/363, b=0	alter /DD_OC3_-_DMSO//A/363, b=0	alter /DD_OC9_-_DMSO//A/363, b=0
F	364	0	0	0				alter /DD_H3K4Me3_-_DMSO//A/364, b=0	alter /DD_OC3_-_DMSO//A/364, b=0	alter /DD_OC9_-_DMSO//A/364, b=0
E	365	10	10	10				alter /DD_H3K4Me3_-_DMSO//A/365, b=10	alter /DD_OC3_-_DMSO//A/365, b=10	alter /DD_OC9_-_DMSO//A/365, b=10
T	366	10	10	10				alter /DD_H3K4Me3_-_DMSO//A/366, b=10	alter /DD_OC3_-_DMSO//A/366, b=10	alter /DD_OC9_-_DMSO//A/366, b=10
I	367	10	10	10				alter /DD_H3K4Me3_-_DMSO//A/367, b=10	alter /DD_OC3_-_DMSO//A/367, b=10	alter /DD_OC9_-_DMSO//A/367, b=10
C	368	10	10	10				alter /DD_H3K4Me3_-_DMSO//A/368, b=10	alter /DD_OC3_-_DMSO//A/368, b=10	alter /DD_OC9_-_DMSO//A/368, b=10
W	369	10	10	10				alter /DD_H3K4Me3_-_DMSO//A/369, b=10	alter /DD_OC3_-_DMSO//A/369, b=10	alter /DD_OC9_-_DMSO//A/369, b=10
Y	370	10	10	10				alter /DD_H3K4Me3_-_DMSO//A/370, b=10	alter /DD_OC3_-_DMSO//A/370, b=10	alter /DD_OC9_-_DMSO//A/370, b=10
V	371	0	0	0				alter /DD_H3K4Me3_-_DMSO//A/371, b=0	alter /DD_OC3_-_DMSO//A/371, b=0	alter /DD_OC9_-_DMSO//A/371, b=0
G	372	0	0	0				alter /DD_H3K4Me3_-_DMSO//A/372, b=0	alter /DD_OC3_-_DMSO//A/372, b=0	alter /DD_OC9_-_DMSO//A/372, b=0
K	373	0	0	0				alter /DD_H3K4Me3_-_DMSO//A/373, b=0	alter /DD_OC3_-_DMSO//A/373, b=0	alter /DD_OC9_-_DMSO//A/373, b=0
H	374	0	0	0				alter /DD_H3K4Me3_-_DMSO//A/374, b=0	alter /DD_OC3_-_DMSO//A/374, b=0	alter /DD_OC9_-_DMSO//A/374, b=0
I	375	0	0	0				alter /DD_H3K4Me3_-_DMSO//A/375, b=0	alter /DD_OC3_-_DMSO//A/375, b=0	alter /DD_OC9_-_DMSO//A/375, b=0
L	376	0	0	0				alter /DD_H3K4Me3_-_DMSO//A/376, b=0	alter /DD_OC3_-_DMSO//A/376, b=0	alter /DD_OC9_-_DMSO//A/376, b=0
D	377	0	0	0				alter /DD_H3K4Me3_-_DMSO//A/377, b=0	alter /DD_OC3_-_DMSO//A/377, b=0	alter /DD_OC9_-_DMSO//A/377, b=0
I	378	0	0	0				alter /DD_H3K4Me3_-_DMSO//A/378, b=0	alter /DD_OC3_-_DMSO//A/378, b=0	alter /DD_OC9_-_DMSO//A/378, b=0
F	379	0	0	0				alter /DD_H3K4Me3_-_DMSO//A/379, b=0	alter /DD_OC3_-_DMSO//A/379, b=0	alter /DD_OC9_-_DMSO//A/379, b=0
R	380	0	0	0				alter /DD_H3K4Me3_-_DMSO//A/380, b=0	alter /DD_OC3_-_DMSO//A/380, b=0	alter /DD_OC9_-_DMSO//A/380, b=0
G	381	0	0	0				alter /DD_H3K4Me3_-_DMSO//A/381, b=0	alter /DD_OC3_-_DMSO//A/381, b=0	alter /DD_OC9_-_DMSO//A/381, b=0
L	382	0	0	0				alter /DD_H3K4Me3_-_DMSO//A/382, b=0	alter /DD_OC3_-_DMSO//A/382, b=0	alter /DD_OC9_-_DMSO//A/382, b=0
R	383	0	0	0				alter /DD_H3K4Me3_-_DMSO//A/383, b=0	alter /DD_OC3_-_DMSO//A/383, b=0	alter /DD_OC9_-_DMSO//A/383, b=0
E	384	0	0	0				alter /DD_H3K4Me3_-_DMSO//A/384, b=0	alter /DD_OC3_-_DMSO//A/384, b=0	alter /DD_OC9_-_DMSO//A/384, b=0
N	385	0	0	0				alter /DD_H3K4Me3_-_DMSO//A/385, b=0	alter /DD_OC3_-_DMSO//A/385, b=0	alter /DD_OC9_-_DMSO//A/385, b=0
R	386	0	0	0				alter /DD_H3K4Me3_-_DMSO//A/386, b=0	alter /DD_OC3_-_DMSO//A/386, b=0	alter /DD_OC9_-_DMSO//A/386, b=0
R	387	0	0	0				alter /DD_H3K4Me3_-_DMSO//A/387, b=0	alter /DD_OC3_-_DMSO//A/387, b=0	alter /DD_OC9_-_DMSO//A/387, b=0
H	388	0	0	0				alter /DD_H3K4Me3_-_DMSO//A/388, b=0	alter /DD_OC3_-_DMSO//A/388, b=0	alter /DD_OC9_-_DMSO//A/388, b=0
P	389	0	0	0				alter /DD_H3K4Me3_-_DMSO//A/389, b=0	alter /DD_OC3_-_DMSO//A/389, b=0	alter /DD_OC9_-_DMSO//A/389, b=0
A	390	0	0	0				alter /DD_H3K4Me3_-_DMSO//A/390, b=0	alter /DD_OC3_-_DMSO//A/390, b=0	alter /DD_OC9_-_DMSO//A/390, b=0
S	391	0	0	0				alter /DD_H3K4Me3_-_DMSO//A/391, b=0	alter /DD_OC3_-_DMSO//A/391, b=0	alter /DD_OC9_-_DMSO//A/391, b=0
Y	392	0	0	0				alter /DD_H3K4Me3_-_DMSO//A/392, b=0	alter /DD_OC3_-_DMSO//A/392, b=0	alter /DD_OC9_-_DMSO//A/392, b=0
L	393	10	10	10				alter /DD_H3K4Me3_-_DMSO//A/393, b=10	alter /DD_OC3_-_DMSO//A/393, b=10	alter /DD_OC9_-_DMSO//A/393, b=10
V	394	0	0	0				alter /DD_H3K4Me3_-_DMSO//A/394, b=0	alter /DD_OC3_-_DMSO//A/394, b=0	alter /DD_OC9_-_DMSO//A/394, b=0
H	395	0	0	0				alter /DD_H3K4Me3_-_DMSO//A/395, b=0	alter /DD_OC3_-_DMSO//A/395, b=0	alter /DD_OC9_-_DMSO//A/395, b=0
G	396	0	0	0				alter /DD_H3K4Me3_-_DMSO//A/396, b=0	alter /DD_OC3_-_DMSO//A/396, b=0	alter /DD_OC9_-_DMSO//A/396, b=0
G	397	0	0	0				alter /DD_H3K4Me3_-_DMSO//A/397, b=0	alter /DD_OC3_-_DMSO//A/397, b=0	alter /DD_OC9_-_DMSO//A/397, b=0
K	398	0	0	0				alter /DD_H3K4Me3_-_DMSO//A/398, b=0	alter /DD_OC3_-_DMSO//A/398, b=0	alter /DD_OC9_-_DMSO//A/398, b=0
A	399	0	0	0				alter /DD_H3K4Me3_-_DMSO//A/399, b=0	alter /DD_OC3_-_DMSO//A/399, b=0	alter /DD_OC9_-_DMSO//A/399, b=0
L	400	0	0	0				alter /DD_H3K4Me3_-_DMSO//A/400, b=0	alter /DD_OC3_-_DMSO//A/400, b=0	alter /DD_OC9_-_DMSO//A/400, b=0
N	401	0	0	0				alter /DD_H3K4Me3_-_DMSO//A/401, b=0	alter /DD_OC3_-_DMSO//A/401, b=0	alter /DD_OC9_-_DMSO//A/401, b=0
L	402	0	0	0				alter /DD_H3K4Me3_-_DMSO//A/402, b=0	alter /DD_OC3_-_DMSO//A/402, b=0	alter /DD_OC9_-_DMSO//A/402, b=0
A	403	0	0	0				alter /DD_H3K4Me3_-_DMSO//A/403, b=0	alter /DD_OC3_-_DMSO//A/403, b=0	alter /DD_OC9_-_DMSO//A/403, b=0
F	404	0	0	0				alter /DD_H3K4Me3_-_DMSO//A/404, b=0	alter /DD_OC3_-_DMSO//A/404, b=0	alter /DD_OC9_-_DMSO//A/404, b=0
R	405	0	0	0				alter /DD_H3K4Me3_-_DMSO//A/405, b=0	alter /DD_OC3_-_DMSO//A/405, b=0	alter /DD_OC9_-_DMSO//A/405, b=0
A	406	0	0	0				alter /DD_H3K4Me3_-_DMSO//A/406, b=0	alter /DD_OC3_-_DMSO//A/406, b=0	alter /DD_OC9_-_DMSO//A/406, b=0
W	407	0	0	0				alter /DD_H3K4Me3_-_DMSO//A/407, b=0	alter /DD_OC3_-_DMSO//A/407, b=0	alter /DD_OC9_-_DMSO//A/407, b=0
T	408	0	0	0				alter /DD_H3K4Me3_-_DMSO//A/408, b=0	alter /DD_OC3_-_DMSO//A/408, b=0	alter /DD_OC9_-_DMSO//A/408, b=0
R	409	0	0	0				alter /DD_H3K4Me3_-_DMSO//A/409, b=0	alter /DD_OC3_-_DMSO//A/409, b=0	alter /DD_OC9_-_DMSO//A/409, b=0
K	410	0	0	0				alter /DD_H3K4Me3_-_DMSO//A/410, b=0	alter /DD_OC3_-_DMSO//A/410, b=0	alter /DD_OC9_-_DMSO//A/410, b=0
E	411	0	0	0				alter /DD_H3K4Me3_-_DMSO//A/411, b=0	alter /DD_OC3_-_DMSO//A/411, b=0	alter /DD_OC9_-_DMSO//A/411, b=0
A	412	0	0	0				alter /DD_H3K4Me3_-_DMSO//A/412, b=0	alter /DD_OC3_-_DMSO//A/412, b=0	alter /DD_OC9_-_DMSO//A/412, b=0
L	413	0	0	0				alter /DD_H3K4Me3_-_DMSO//A/413, b=0	alter /DD_OC3_-_DMSO//A/413, b=0	alter /DD_OC9_-_DMSO//A/413, b=0
P	414	0	0	0				alter /DD_H3K4Me3_-_DMSO//A/414, b=0	alter /DD_OC3_-_DMSO//A/414, b=0	alter /DD_OC9_-_DMSO//A/414, b=0
D	415	0	0	0				alter /DD_H3K4Me3_-_DMSO//A/415, b=0	alter /DD_OC3_-_DMSO//A/415, b=0	alter /DD_OC9_-_DMSO//A/415, b=0
H	416	0	0	0				alter /DD_H3K4Me3_-_DMSO//A/416, b=0	alter /DD_OC3_-_DMSO//A/416, b=0	alter /DD_OC9_-_DMSO//A/416, b=0
E	417	0	0	0				alter /DD_H3K4Me3_-_DMSO//A/417, b=0	alter /DD_OC3_-_DMSO//A/417, b=0	alter /DD_OC9_-_DMSO//A/417, b=0
D	418	0	0	0				alter /DD_H3K4Me3_-_DMSO//A/418, b=0	alter /DD_OC3_-_DMSO//A/418, b=0	alter /DD_OC9_-_DMSO//A/418, b=0
E	419	0	0	0				alter /DD_H3K4Me3_-_DMSO//A/419, b=0	alter /DD_OC3_-_DMSO//A/419, b=0	alter /DD_OC9_-_DMSO//A/419, b=0
I	420	0	0	0				alter /DD_H3K4Me3_-_DMSO//A/420, b=0	alter /DD_OC3_-_DMSO//A/420, b=0	alter /DD_OC9_-_DMSO//A/420, b=0
P	421	0	0	0				alter /DD_H3K4Me3_-_DMSO//A/421, b=0	alter /DD_OC3_-_DMSO//A/421, b=0	alter /DD_OC9_-_DMSO//A/421, b=0
E	422	0	0	0				alter /DD_H3K4Me3_-_DMSO//A/422, b=0	alter /DD_OC3_-_DMSO//A/422, b=0	alter /DD_OC9_-_DMSO//A/422, b=0
T	423	0	0	0				alter /DD_H3K4Me3_-_DMSO//A/423, b=0	alter /DD_OC3_-_DMSO//A/423, b=0	alter /DD_OC9_-_DMSO//A/423, b=0
V	424	0	0	0				alter /DD_H3K4Me3_-_DMSO//A/424, b=0	alter /DD_OC3_-_DMSO//A/424, b=0	alter /DD_OC9_-_DMSO//A/424, b=0
R	425	0	0	0				alter /DD_H3K4Me3_-_DMSO//A/425, b=0	alter /DD_OC3_-_DMSO//A/425, b=0	alter /DD_OC9_-_DMSO//A/425, b=0
T	426	0	0	0				alter /DD_H3K4Me3_-_DMSO//A/426, b=0	alter /DD_OC3_-_DMSO//A/426, b=0	alter /DD_OC9_-_DMSO//A/426, b=0
V	427	0	0	0				alter /DD_H3K4Me3_-_DMSO//A/427, b=0	alter /DD_OC3_-_DMSO//A/427, b=0	alter /DD_OC9_-_DMSO//A/427, b=0
Q	428	0	0	0				alter /DD_H3K4Me3_-_DMSO//A/428, b=0	alter /DD_OC3_-_DMSO//A/428, b=0	alter /DD_OC9_-_DMSO//A/428, b=0
L	429	10	10	10				alter /DD_H3K4Me3_-_DMSO//A/429, b=10	alter /DD_OC3_-_DMSO//A/429, b=10	alter /DD_OC9_-_DMSO//A/429, b=10
I	430	10	10	10				alter /DD_H3K4Me3_-_DMSO//A/430, b=10	alter /DD_OC3_-_DMSO//A/430, b=10	alter /DD_OC9_-_DMSO//A/430, b=10
K	431	0	0	0				alter /DD_H3K4Me3_-_DMSO//A/431, b=0	alter /DD_OC3_-_DMSO//A/431, b=0	alter /DD_OC9_-_DMSO//A/431, b=0
D	432	0	0	0				alter /DD_H3K4Me3_-_DMSO//A/432, b=0	alter /DD_OC3_-_DMSO//A/432, b=0	alter /DD_OC9_-_DMSO//A/432, b=0
L	433	0	0	0				alter /DD_H3K4Me3_-_DMSO//A/433, b=0	alter /DD_OC3_-_DMSO//A/433, b=0	alter /DD_OC9_-_DMSO//A/433, b=0
A	434	0	0	0				alter /DD_H3K4Me3_-_DMSO//A/434, b=0	alter /DD_OC3_-_DMSO//A/434, b=0	alter /DD_OC9_-_DMSO//A/434, b=0
R	435	0	0	0				alter /DD_H3K4Me3_-_DMSO//A/435, b=0	alter /DD_OC3_-_DMSO//A/435, b=0	alter /DD_OC9_-_DMSO//A/435, b=0
E	436	0	0	0				alter /DD_H3K4Me3_-_DMSO//A/436, b=0	alter /DD_OC3_-_DMSO//A/436, b=0	alter /DD_OC9_-_DMSO//A/436, b=0
I	437	10	10	10				alter /DD_H3K4Me3_-_DMSO//A/437, b=10	alter /DD_OC3_-_DMSO//A/437, b=10	alter /DD_OC9_-_DMSO//A/437, b=10
R	438	10	10	10				alter /DD_H3K4Me3_-_DMSO//A/438, b=10	alter /DD_OC3_-_DMSO//A/438, b=10	alter /DD_OC9_-_DMSO//A/438, b=10
L	439	10	10	10				alter /DD_H3K4Me3_-_DMSO//A/439, b=10	alter /DD_OC3_-_DMSO//A/439, b=10	alter /DD_OC9_-_DMSO//A/439, b=10
V	440	10	10	10				alter /DD_H3K4Me3_-_DMSO//A/440, b=10	alter /DD_OC3_-_DMSO//A/440, b=10	alter /DD_OC9_-_DMSO//A/440, b=10
E	441	10	10	10				alter /DD_H3K4Me3_-_DMSO//A/441, b=10	alter /DD_OC3_-_DMSO//A/441, b=10	alter /DD_OC9_-_DMSO//A/441, b=10
D	442	0	0	0				alter /DD_H3K4Me3_-_DMSO//A/442, b=0	alter /DD_OC3_-_DMSO//A/442, b=0	alter /DD_OC9_-_DMSO//A/442, b=0
I	443	0	0	0				alter /DD_H3K4Me3_-_DMSO//A/443, b=0	alter /DD_OC3_-_DMSO//A/443, b=0	alter /DD_OC9_-_DMSO//A/443, b=0
F	444	0	0	0				alter /DD_H3K4Me3_-_DMSO//A/444, b=0	alter /DD_OC3_-_DMSO//A/444, b=0	alter /DD_OC9_-_DMSO//A/444, b=0
Q	445	0	0	0				alter /DD_H3K4Me3_-_DMSO//A/445, b=0	alter /DD_OC3_-_DMSO//A/445, b=0	alter /DD_OC9_-_DMSO//A/445, b=0
Q	446	0	0	0				alter /DD_H3K4Me3_-_DMSO//A/446, b=0	alter /DD_OC3_-_DMSO//A/446, b=0	alter /DD_OC9_-_DMSO//A/446, b=0
N	447	0	0	0				alter /DD_H3K4Me3_-_DMSO//A/447, b=0	alter /DD_OC3_-_DMSO//A/447, b=0	alter /DD_OC9_-_DMSO//A/447, b=0
