# Supplementary material for: Cyclic peptides target the aromatic cage of a PHD-finger reader domain to modulate epigenetic protein function
Source: Chem Sci. 2023 Apr 17;14(26):7136–46. doi: 10.1039/d2sc05944d (PMC10321576; doi:10.1039/d2sc05944d)
Supplement: SC-014-D2SC05944D-s003 [file SC-014-D2SC05944D-s003.xlsx]

## Sheet: HSQC - Free PHD
AA		AA position	H(ppm)	N(ppm)		CO(ppm)		CA(ppm)		CB(ppm)
Ser	S	0
Met	M	1				175.771		55.7371		33.1672
Ala	A	2	8.34319	125.614		177.57		52.5794		19.4133
Ser	S	3	8.19527	115.359		174.03		58.2558		63.8227
Val	V	4	7.86829	122.264				59.7379
Pro	P	5				175.583		63.2566		32.1567
Val	V	6	7.39339	113.035		174.483		59.4241		34.7983
Tyr	Y	7	7.96171	118.504		175.027		57.7612		43.2236
Cys	C	8	7.68144	116.385		176.594		59.0288		28.4777
Leu	L	9	10.3362	128.69		178.971		57.696		42.8279
Cys	C	10	7.7048	115.701		175.134		58.2887		30.2418
Arg	R	11	7.71258	118.777		174.736		55.7587		25.9742
Leu	L	12	7.7048	119.871		176.14		52.5802
Pro	P	13				176.644		62.4352		32.5179
Tyr	Y	14	8.91929	122.401		174.177		60.7156		38.6227
Asp	D	15	7.47903	127.528		176.552		52.0449		42.585
Val	V	16	8.3899	123.905		176.071		63.4085		32.1568
Thr	T	17	8.39768	111.258		174.696		62.8814		69.6134
Arg	R	18	7.36225	120.76		175		54.7764		33.5092
Phe	F	19	8.65459	123.631		175.875		59.0567		39.3669
Met	M	20	7.98507	127.391		172.314		54.1378		39.2976
Ile	I	21	9.02828	119.188		172.203		59.4514		42.8718
Glu	E	22	8.0707	129.305		175.758		54.306		29.7724
Cys	C	23	8.88815	127.596		176.998		59.0116		32.247
Asp	D	24	9.44869	130.399		175.804		57.2452		44.7694
Met	M	25	8.87258	115.701		177.239		55.6179		32.511
Cys	C	26	8.27312	119.119		176.347		59.3634		31.894
Gln	Q	27	7.6503	115.428		174.717		58.4824		26.1379
Asp	D	28	8.23419	122.332		174.102		53.5133		42.0652
Trp	W	29	9.18399	120.487		174.996		56.2329		32.2358
Phe	F	30	9.05164	115.77		177.13		56.3669		42.2268
His	H	31	10.1104	124.793		178.099		57.5787		30.3329
Gly	G	32	8.41325	113.855		176.666		48.6961
Ser	S	33	8.71688	113.65		177.156		60.9288		62.7164
Cys	C	34	7.41675	121.58		177.145		63.1685		30.7153
Val	V	35	7.34668	106.814		176.069		60.9331		32.5296
Gly	G	36	7.76708	111.463		174.799		47.0512
Val	V	37	8.34319	121.512		174.561		61.7739		34.0872
Glu	E	38	8.25755	125.819		177.29		55.6755		30.5905
Glu	E	39	8.8103	124.862		178.848		60.5282		29.1768
Glu	E	40	8.97379	116.522		178.129		59.2763		29.1058
Lys	K	41	7.21433	117.752		178.403		56.5413		32.4393
Ala	A	42	7.81379	122.674		179.05		54.7698		18.4806
Ala	A	43	7.44789	118.299		177.926		54.1025		18.1748
Asp	D	44	7.47903	115.154		175.785		54.9782		41.5869
Ile	I	45	7.69701	122.537		174.809		62.7182		39.1157
Asp	D	46	8.98157	128.348		175.315		55.5119		42.9319
Leu	L	47	7.63473	116.727		174.616		53.139		43.8104
Tyr	Y	48	9.1762	126.297		175.549		57.6054		38.1646
His	H	49	8.04735	127.049		171.608		50.8533		30.7157
Cys	C	50	8.98936	126.502		172.847		57.0301
Pro	P	51				179.015		65.6541		32.1998
Asn	N	52	7.87607	114.471		177.969		55.8109		38.8297
Cys	C	53	8.88037	125.682		177.538		64.7066		29.4195
Glu	E	54	8.97379	120.692		178.243		57.5857		29.4332
Val	V	55	6.8095	117.41		177.102		65.9095		31.7527
Leu	L	56	6.94963	116.111		178.617		55.866		43.4111
His	H	57	8.23419	114.197		175.908		55.8657		31.4948
Gly	G	58	7.8605	109.48		172.066		44.9714
Pro	P	59				175.678		63.0713		33.1625
Ser	S	60	8.21084	113.172		172.171		59.9604		63.7963
Ile	I	61	8.42882	124.657		176.528		60.1142		38.0662
Met	M	62	8.83365	127.186		177.289		53.7666		31.4332
Lys	K	63	8.62345	121.444		176.677		57.7282		33.5941
Lys	K	64	8.43661	122.811		176.238		56.2278		32.8613
Arg	R	65	8.35097	123.631		175.335		56.0726		30.9117
Arg	R	66	7.95393	127.323		180.891		57.5592
Arg side chain			6.87957	[118.85]	aliased
Asn/Gln side chain			8.14856	114.607
Asn/Gln side chain			6.90292	114.607
Asn/Gln side chain			7.30775	112.557
Asn/Gln side chain			6.52923	112.557
Trp side chain			9.97808	129.852
His			11.82	[133.76]	aliased

## Sheet: HSQC - PHD+OC9
AA		AA position	H(ppm)	N(ppm)		CO(ppm)		CA(ppm)		CB(ppm)
Ser	S	0
Met	M	1				175.714		55.683		33.1681
Ala	A	2	8.34454	125.579		177.509		52.5612		19.4173
Ser	S	3	8.18884	115.359		174.079		58.1953		63.7906
Val	V	4	7.90078	122.264		173.812		59.7678
Pro	P	5				175.563		63.2169		32.2009
Val	V	6	7.27018	111.668		174.288		58.7007		34.7499
Tyr	Y	7	7.73729	116.351		175.106		57.9359		44.0765
Cys	C	8	7.35582	115.94		176.915		59.1199		28.0976
Leu	L	9	10.6178	128.416		178.954		57.6168		42.8798
Cys	C	10	7.67501	115.188		175.055		58.182		30.0446
Arg	R	11	7.70615	118.846		174.738		55.294		25.664
Leu	L	12	7.48817	118.812		176.377		52.3082
Pro	P	13				176.909		62.0833		32.5461
Tyr	Y	14	9.35662	121.683		173.915		61.9843		38.4803
Asp	D	15	7.79958	128.895		176.359		51.7198		42.5391
Val	V	16	8.29004	127.528		174.476		62.8734		32.5654
Thr	T	17	8.19662	108.933		175.093		62.5096		69.7066
Arg	R	18	7.52709	119.871		175.767		55.1776		33.9368
Phe	F	19	8.82722	126.707		176.188		58.0378		40.0252
Met	M	20	8.45353	128.861		170.486		53.476		39.4482
Ile	I	21	8.92065	117.855		173.562		57.7515		43.457
Glu	E	22	8.12655	127.904		176.033		55.563		32.0414
Cys	C	23	9.09192	127.596		177.061		60.0544		32.4002
Asp	D	24	9.37997	129.784		176.06		57.6999		42.8852
Met	M	25	9.48118	120.965		176.34		56.0011		32.178
Cys	C	26	8.48467	119.495		176.218		59.7658		31.9486
Gln	Q	27	7.81515	116.385		174.305		58.9985		26.4328
Asp	D	28	8.33676	120.726		174.243		53.2173		41.7019
Trp	W	29	9.65246	122.572		175.332		53.1258		32.9292
Phe	F	30	8.71823	116.556		177.173		56.3065		41.9424
His	H	31	10.322	126.195		178.199		57.8821		30.275
Gly	G	32	8.16548	113.445		176.627		49.0062
Ser	S	33	8.55474	113.206		176.859		60.8372		62.8278
Cys	C	34	7.37139	121.478		177.196		63.1709		30.8358
Val	V	35	7.37139	106.165		176.102		61.06		32.7873
Gly	G	36	7.86186	112.283		174.882		47.1709
Val	V	37	8.23555	121.136		174.998		61.6797		34.5787
Glu	E	38	8.43018	127.323		177.076		55.3243		30.3302
Glu	E	39	8.61702	126.776		178.363		60.0738		28.9557
Glu	E	40	8.92065	115.564		177.17		58.8045		29.108
Lys	K	41	7.25461	116.727		177.563		55.4005		32.8574
Ala	A	42	7.23904	124.451		177.356		55.3107		18.1479
Ala	A	43	7.51152	113.719		178.205		53.3671		17.125
Asp	D	44	7.55045	116.419		175.105		54.9632		41.1624
Ile	I	45	7.85407	122.572		174.519		62.7197		38.4779
Asp	D	46	9.18534	129.305		175.454		55.4452		43.4692
Leu	L	47	7.63609	117.649		175.244		54.6095		45.786
Tyr	Y	48	10.2753	127.87		174.807		57.3674		39.33
His	H	49	8.1577	127.323		171.745		50.6359		31.0143
Cys	C	50	8.92065	126.502		173.031		56.8228
Pro	P	51				178.848		65.581		32.2687
Asn	N	52	7.93971	114.471		178.034		55.7372		38.7887
Cys	C	53	8.95957	125.99		177.505		64.7448		29.1099
Glu	E	54	8.91286	120.316		178.182		57.5594		29.7134
Val	V	55	6.77971	117.273		177.052		65.8708		31.6119
Leu	L	56	7.02106	115.872		178.508		55.7476		43.3556
His	H	57	8.1577	114.163		175.885		55.8641		31.2789
Gly	G	58	7.79958	109.549		171.915		44.8381
Pro	P	59				176.126		63.1082		33.0741
Ser	S	60	8.25112	113.548		172.695		60.145		63.6211
Ile	I	61	8.62481	124.076		176.16		59.9987		38.8655
Met	M	62	8.85058	126.229		177.162		53.6059		31.7879
Lys	K	63	8.79608	121.922		176.564		57.7214		33.6399
Lys	K	64	8.40682	122.64		176.234		56.228		33.047
Arg	R	65	8.36011	123.529		175.289		56.0768		30.9781
Arg	R	66	7.94749	127.289		176.175		57.5956
Arg side chain			6.80307	[118.37]	aliased
Asn/Gln side chain			6.85757	114.3
Asn/Gln side chain			7.45703	112.112
Asn/Gln side chain			6.47609	112.112
Asn/Gln side chain			8.07206	114.3
Trp side chain			10.8358	129.134
His			11.671	[134.38]	aliased

## Sheet: CSP Calculations
CSP: ∆δ = [0.5[(∆δH)2 + (0.14∆δN)2]]1/2				Free PHD			PHD+OC9			PHD+OC9 L3A					Free vs OC9				OC9 vs OC9 L3A				Free vs OC9 L3A
	Amino Acid			1-H	15-N		1-H	15-N		1-H	15-N				∆δH	∆δN	CSP		∆δH	∆δN	CSP		∆δH	∆δN	CSP
	0	Ser	S	/	/		/	/		/	/		0	S	/	/	/		/	/	/		/	/	/
	1	Met	M	/	/		/	/		/	/		1	M	/	/	/		/	/	/		/	/	/
	2	Ala	A	8.34319	125.614		8.34454	125.579		8.34454	125.682		2	A	0.00135461	-0.034181	0.0035167		0	0.102543	0.0101512		0.00135461	0.068362	0.00683494
	3	Ser	S	8.19527	115.359		8.18884	115.359		8.18884	115.359		3	S	-0.0064306	0	0.00454712		0	0	0		-0.0064306	0	0.00454712
	4	Val	V	7.86829	122.264		7.90078	122.264		7.90078	122.332		4	V	0.0324954	0	0.0229777		0	0.068362	0.00676749		0.0324954	0.068362	0.0239536
	5	Pro	P	/	/		/	/		/	/		5	P	/	/	/		/	/	/		/	/	/
	6	Val	V	7.39339	113.035		7.27018	111.668		7.2624	111.668		6	V	-0.123209	-1.36724	0.160965		-0.00778521	0	0.00550497		-0.130994	-1.36724	0.16401
	7	Tyr	Y	7.96171	118.504		7.73729	116.351		7.75286	116.385		7	Y	-0.224416	-2.1534	0.265754		0.0155704	0.034181	0.0115182		-0.208846	-2.11922	0.256556
	8	Cys	C	7.68144	116.385		7.35582	115.94		7.37139	115.975		8	C	-0.325624	-0.444353	0.234415		0.0155704	0.034181	0.0115182		-0.310054	-0.410172	0.22297
	9	Leu	L	10.3362	128.69		10.6178	128.416		10.6023	128.485		9	L	0.281622	-0.273448	0.200968		-0.0155704	0.068362	0.0129235		0.266052	-0.205086	0.189219
	10	Cys	C	7.7048	115.701		7.67501	115.188		7.67501	115.291		10	C	-0.0297862	-0.512715	0.0549527		0	0.102543	0.0101512		-0.0297862	-0.410172	0.0457424
	11	Arg	R	7.71258	118.777		7.70615	118.846		7.69837	118.914		11	R	-0.00643059	0.068362	0.00815323		-0.00778521	0.068362	0.00872374		-0.0142158	0.136724	0.0168594
	12	Leu	L	7.7048	119.871		7.48817	118.812		7.50374	118.846		12	L	-0.216631	-1.05961	0.185655		0.0155704	0.034181	0.0115182		-0.201061	-1.02543	0.174693
	13	Pro	P	/	/		/	/		/	/		13	P	/	/	/		/	/	/		/	/	/
	14	Tyr	Y	8.91929	122.401		9.35662	121.683		9.34883	121.649		14	Y	0.437326	-0.717801	0.317296		-0.00778521	-0.034181	0.00646177		0.429541	-0.751981	0.312721
	15	Asp	D	7.47903	127.528		7.79958	128.895		7.78401	128.827		15	D	0.320548	1.36724	0.263998		-0.0155704	-0.068362	0.0129235		0.304978	1.29888	0.251076
	16	Val	V	8.3899	123.905		8.29004	127.528		8.32118	127.596		16	V	-0.0998531	3.62318	0.36556		0.0311408	0.068362	0.0230364		-0.0687123	3.69155	0.36866
	17	Thr	T	8.39768	111.258		8.19662	108.933		8.19662	109.002		17	T	-0.201061	-2.32431	0.270474		0	0.068362	0.00676749		-0.201061	-2.25594	0.264741
	18	Arg	R	7.36225	120.76		7.52709	119.871		7.51931	120.008		18	R	0.164844	-0.888705	0.146037		-0.00778521	0.136724	0.0146116		0.157059	-0.751981	0.133699
	19	Phe	F	8.65459	123.631		8.82722	126.707		8.81165	126.571		19	F	0.172629	3.07629	0.32809		-0.0155704	-0.136724	0.0174475		0.157059	2.93956	0.311474
	20	Met	M	7.98507	127.391		8.45353	128.861		8.44575	128.827		20	M	0.468467	1.46978	0.361803		-0.00778521	-0.034181	0.00646177		0.460682	1.4356	0.355403
	21	Ile	I	9.02828	119.188		8.92065	117.855		8.95957	117.82		21	I	-0.107638	-1.33306	0.152342		0.038926	-0.034181	0.0277321		-0.0687123	-1.36724	0.143806
	22	Glu	E	8.0707	129.305		8.12655	127.904		8.09541	127.87		22	E	0.0558511	-1.40142	0.144245		-0.0311408	-0.034181	0.0222784		0.0247102	-1.4356	0.143187
	23	Cys	C	8.88815	127.596		9.09192	127.596		9.09971	127.391		23	C	0.20377	0	0.144087		0.00778521	-0.205086	0.0210356		0.211555	-0.205086	0.150964
	24	Asp	D	9.44869	130.399		9.37997	129.784		9.37219	129.852		24	D	-0.0687123	-0.615258	0.0779128		-0.00778521	0.068362	0.00872374		-0.0764975	-0.546896	0.0765314
	25	Met	M	8.87258	115.701		9.48118	120.965		9.52789	121.17		25	M	0.608601	5.26387	0.675825		0.0467112	0.205086	0.0387706		0.655312	5.46896	0.712622
	26	Cys	C	8.27312	119.119		8.48467	119.495		8.50024	119.529		26	C	0.211555	0.375991	0.154153		0.0155704	0.034181	0.0115182		0.227126	0.410172	0.165656
	27	Gln	Q	7.6503	115.428		7.81515	116.385		7.79958	116.385		27	Q	0.164844	0.957067	0.150211		-0.0155704	0	0.0110099		0.149274	0.957067	0.141838
	28	Asp	D	8.23419	122.332		8.33676	120.726		8.37568	120.76		28	D	0.102562	-1.60651	0.174791		0.038926	0.034181	0.0277321		0.141488	-1.57232	0.185033
	29	Trp	W	9.18399	120.487		9.65246	122.572		9.5746	122.332		29	W	0.468467	2.08504	0.390301		-0.0778521	-0.239267	0.0599292		0.390615	1.84577	0.331176
	30	Phe	F	9.05164	115.77		8.71823	116.556		8.70266	116.522		30	F	-0.333409	0.786162	0.24827		-0.0155704	-0.034181	0.0115182		-0.34898	0.751981	0.25775
	31	His	H	10.1104	124.793		10.322	126.195		10.3298	126.229		31	H	0.211555	1.40142	0.204022		0.00778521	0.034181	0.00646177		0.21934	1.4356	0.210363
	32	Gly	G	8.41325	113.855		8.16548	113.445		8.19662	113.445		32	G	-0.247772	-0.410172	0.179845		0.0311408	0	0.0220199		-0.216631	-0.410172	0.158472
	33	Ser	S	8.71688	113.65		8.55474	113.206		8.56253	113.24		33	S	-0.162135	-0.444353	0.122796		0.00778521	0.034181	0.00646177		-0.15435	-0.410172	0.11645
	34	Cys	C	7.41675	121.58		7.37139	121.478		7.37917	121.512		34	C	-0.0453566	-0.102543	0.0336401		0.00778521	0.034181	0.00646177		-0.0375714	-0.068362	0.0274154
	35	Val	V	7.34668	106.814		7.37139	106.165		7.37139	106.267		35	V	0.0247102	-0.649439	0.0666232		0	0.102543	0.0101512		0.0247102	-0.546896	0.0568896
	36	Gly	G	7.76708	111.463		7.86186	112.283		7.85407	112.283		36	G	0.0947771	0.820343	0.105292		-0.00778521	0	0.00550497		0.0869919	0.820343	0.101877
	37	Val	V	8.34319	121.512		8.23555	121.136		8.24333	121.17		37	V	-0.107638	-0.375991	0.0847255		0.00778521	0.034181	0.00646177		-0.0998531	-0.34181	0.0782962
	38	Glu	E	8.25755	125.819		8.43018	127.323		8.38347	127.118		38	E	0.172629	1.50396	0.192528		-0.0467112	-0.205086	0.0387706		0.125918	1.29888	0.1564
	39	Glu	E	8.8103	124.862		8.61702	126.776		8.60145	126.571		39	E	-0.193276	1.91413	0.233632		-0.0155704	-0.205086	0.0230956		-0.208846	1.70905	0.224572
	40	Glu	E	8.97379	116.522		8.92065	115.564		8.90508	115.564		40	E	-0.0531418	-0.957067	0.101925		-0.0155704	0	0.0110099		-0.0687123	-0.957067	0.106477
	41	Lys	K	7.21433	117.752		7.25461	116.727		7.21569	116.727		41	K	0.0402807	-1.02543	0.105433		-0.038926	0	0.0275249		0.00135462	-1.02543	0.101517
	42	Ala	A	7.81379	122.674		7.23904	124.451		7.2624	124.588		42	A	-0.574751	1.77741	0.442865		0.0233556	0.136724	0.0213527		-0.551395	1.91413	0.433503
	43	Ala	A	7.44789	118.299		7.51152	113.719		7.50374	114.06		43	A	0.0636363	-4.58025	0.455649		-0.00778521	0.34181	0.0342823		0.0558511	-4.23844	0.421439
	44	Asp	D	7.47903	115.154		7.55045	116.419		7.54266	116.385		44	D	0.0714215	1.2647	0.135001		-0.00778521	-0.034181	0.00646177		0.0636363	1.23052	0.12986
	45	Ile	I	7.69701	122.537		7.85407	122.572		7.8385	122.401		45	I	0.157059	0.034181	0.111109		-0.0155704	-0.170905	0.0201857		0.141488	-0.136724	0.100959
	46	Asp	D	8.98157	128.348		9.18534	129.305		9.2087	129.442		46	D	0.20377	0.957067	0.172446		0.0233556	0.136724	0.0213527		0.227126	1.09379	0.193694
	47	Leu	L	7.63473	116.727		7.63609	117.649		7.63609	117.752		47	L	0.00135461	0.922886	0.0913661		0	0.102543	0.0101512		0.00135461	1.02543	0.101517
	48	Tyr	Y	9.1762	126.297		10.2753	127.87		10.3765	128.143		48	Y	1.09907	1.57232	0.792593		0.101208	0.273448	0.0765133		1.20028	1.84577	0.86817
	49	His	H	8.04735	127.049		8.1577	127.323		8.18105	127.323		49	H	0.110348	0.273448	0.0825898		0.0233556	0	0.0165149		0.133703	0.273448	0.0983415
	50	Cys	C	8.98936	126.502		8.92065	126.502		8.90508	126.571		50	C	-0.0687123	0	0.0485869		-0.0155704	0.068362	0.0129235		-0.0842827	0.068362	0.0599799
	51	Pro	P	/	/		/	/		/	/		51	P	/	/	/		/	/	/		/	/	/
	52	Asn	N	7.87607	114.471		7.93971	114.471		7.96307	114.539		52	N	0.0636363	0	0.0449976		0.0233556	0.068362	0.0178477		0.0869919	0.068362	0.0618837
	53	Cys	C	8.88037	125.682		8.95957	125.99		8.95179	125.955		53	C	0.0792067	0.307629	0.0637517		-0.00778521	-0.034181	0.00646177		0.0714215	0.273448	0.0573
	54	Glu	E	8.97379	120.692		8.91286	120.316		8.91286	120.35		54	E	-0.0609271	-0.375991	0.0569339		0	0.034181	0.00338374		-0.0609271	-0.34181	0.0547816
	55	Val	V	6.8095	117.41		6.77971	117.273		6.7875	117.273		55	V	-0.0297862	-0.136724	0.0250361		0.00778521	0	0.00550497		-0.022001	-0.136724	0.0206208
	56	Leu	L	6.94963	116.111		7.02106	115.872		7.02106	115.975		56	L	0.0714215	-0.239267	0.0557813		0	0.102543	0.0101512		0.0714215	-0.136724	0.0522849
	57	His	H	8.23419	114.197		8.1577	114.163		8.16548	114.197		57	H	-0.0764975	-0.034181	0.0541976		0.00778521	0.034181	0.00646177		-0.0687123	0	0.0485869
	58	Gly	G	7.8605	109.48		7.79958	109.549		7.79179	109.549		58	G	-0.060927	0.068362	0.0436102		-0.00778521	0	0.00550497		-0.0687123	0.068362	0.0490559
	59	Pro	P	/	/		/	/		/	/		59	P	/	/	/		/	/	/		/	/	/
	60	Ser	S	8.21084	113.172		8.25112	113.548		8.25112	113.582		60	S	0.0402806	0.375991	0.0468688		0	0.034181	0.00338374		0.0402806	0.410172	0.0495986
	61	Ile	I	8.42882	124.657		8.62481	124.076		8.61702	124.11		61	I	0.195985	-0.581077	0.150047		-0.00778521	0.034181	0.00646177		0.1882	-0.546896	0.143669
	62	Met	M	8.83365	127.186		8.85058	126.229		8.84279	126.229		62	M	0.016925	-0.957067	0.0954977		-0.00778521	0	0.00550497		0.00913981	-0.957067	0.094965
	63	Lys	K	8.62345	121.444		8.79608	121.922		8.79608	121.922		63	K	0.172629	0.478534	0.130937		0	0	0		0.172629	0.478534	0.130937
	64	Lys	K	8.43661	122.811		8.40682	122.64		8.40682	122.674		64	K	-0.0297862	-0.170905	0.0270158		0	0.034181	0.00338374		-0.0297862	-0.136724	0.0250361
	65	Arg	R	8.35097	123.631		8.36011	123.529		8.35233	123.631		65	R	0.00913982	-0.102543	0.0120339		-0.00778521	0.102543	0.0115478		0.00135461	0	0.000957853
	66	Arg	R	7.95393	127.323		7.94749	127.289		7.94749	127.323		66	R	-0.0064306	-0.034181	0.00566798		0	0.034181	0.00338374		-0.0064306	0	0.00454712
		Trp side chain		9.97808	129.852		10.8358	129.134							0.857727	-0.717801	0.610653
																stdev	0.15409			stdev	0.013408			stdev	0.158483
