# Supplementary material for: Cyclic peptides target the aromatic cage of a PHD-finger reader domain to modulate epigenetic protein function
Source: Chem Sci. 2023 Apr 17;14(26):7136–46. doi: 10.1039/d2sc05944d (PMC10321576; doi:10.1039/d2sc05944d)
Supplement: SC-014-D2SC05944D-s004 [file SC-014-D2SC05944D-s004.xlsx]

## Sheet: Sheet1
Gene names	Protein names	Protein IDs	Majority protein IDs	LFQ intensity_20 µM competitor, n=1	LFQ intensity_20 µM competitor, n=2	LFQ intensity_10 µM competitor, n=1	LFQ intensity_10 µM competitor, n=2	LFQ intensity_1 µM competitor, n=1	LFQ intensity_1 µM competitor, n=2	LFQ intensity_0.1 µM competitor, n=1	LFQ intensity_0.1 µM competitor, n=2	LFQ intensity_0 µM competitor, n=1	LFQ intensity_0 µM competitor, n=2	Score	Intensity	MS/MS Count	MS/MS count_20 µM competitor, n=1	MS/MS count_20 µM competitor, n=2	MS/MS count_10 µM competitor, n=1	MS/MS count_10 µM competitor, n=2	MS/MS count_1 µM competitor, n=1	MS/MS count_1 µM competitor, n=2	MS/MS count_0.1 µM competitor, n=1	MS/MS count_0.1 µM competitor, n=2	MS/MS count_0 µM competitor, n=1	MS/MS count_0 µM competitor, n=2	Sequence coverage [%]	Mol. weight [kDa]
PHF8	Histone lysine demethylase PHF8	Q9UPP1-2;Q9UPP1;H0Y3N9;Q9UPP1-5;Q9UPP1-4;Q9UPP1-3;H0Y589;H0Y7M8;H7BZB7	Q9UPP1-2;Q9UPP1;H0Y3N9;Q9UPP1-5;Q9UPP1-4;Q9UPP1-3;H0Y589	22.5914	21.0412	NaN	22.0243	22.457	22.4706	24.25	24.079	25.8584	25.4776	27.276	138460000	17	0	0	0	0	0	0	3	4	4	6	9.9	113.91
PHF2	Lysine-specific demethylase PHF2	O75151;A0A087WW48;E7ET14;B0QZZ4;Q5JPR8;B0QZZ2;B0QZZ3;B0QZE1	O75151	21.6038	21.969	21.7982	22.0838	23.2561	23.8725	25.6924	25.406	27.7273	27.878	29.678	500180000	36	1	2	1	1	1	2	4	5	7	12	9.9	120.77
PHF5A	PHD finger-like domain-containing protein 5A	Q7RTV0	Q7RTV0	24.91	24.0952	24.6192	24.6758	23.8694	24.3241	24.5825	24.3938	24.1391	24.7096	17.562	212350000	23	2	2	2	2	2	3	2	3	3	2	32.7	12.405
RPS9	40S ribosomal protein S9	B5MCT8;C9JM19;A0A024R4M0;P46781;F2Z3C0;A8MXK4	B5MCT8;C9JM19;A0A024R4M0;P46781	22.6026	23.7051	23.307	23.3051	22.8803	22.8317	23.4726	24.5649	23.1481	23.4966	5.5815	113820000	22	2	2	2	3	1	1	2	4	1	3	27.3	16.628
SERPINA1	Alpha-1-antitrypsin;Short peptide from AAT	A0A0G2JRN3;A0A024R6I7;P01009-2;P01009;P01009-3;G3V2B9;G3V544	A0A0G2JRN3;A0A024R6I7;P01009-2;P01009;P01009-3	25.6524	25.2163	25.2014	25.4643	24.9737	25.1473	25.126	24.2506	25.3486	24.3969	26.374	393820000	38	3	3	5	4	3	2	3	3	3	4	23.7	40.234
RPS17	40S ribosomal protein S17	H0YN88;A0A075B716;P08708;H0YN73	H0YN88;A0A075B716;P08708;H0YN73	22.9415	23.4514	23.2981	22.6594	22.9492	22.8158	22.4235	23.0499	22.1305	23.1257	3.7604	79274000	9	1	2	2	1	1	0	1	0	0	1	25	15.919
HELLS	Lymphoid-specific helicase	A0A087WSW7;F6XU50;A0A0B4J1V9;Q9NRZ9-6;Q9NRZ9-5;Q9NRZ9-4;Q9NRZ9-3;Q9NRZ9-2;Q9NRZ9	A0A087WSW7;F6XU50;A0A0B4J1V9;Q9NRZ9-6;Q9NRZ9-5;Q9NRZ9-4;Q9NRZ9-3;Q9NRZ9-2;Q9NRZ9	NaN	22.5348	23.2835	21.7572	22.3908	22.4467	22.132	22.1502	22.5043	23.1387	5.5643	53843000	8	0	0	3	1	0	1	1	0	0	2	5.1	81.035
KHSRP	Far upstream element-binding protein 2	A0A087WTP3;Q92945;M0R0I5;M0QXW7;M0QYH3;M0R3J3;M0QYG1;M0R0C6	A0A087WTP3;Q92945;M0R0I5	26.2745	26.1527	26.0934	26.0704	25.9836	26.4135	26.3364	26.2539	26.2819	26.2173	45.315	753890000	66	7	5	8	6	6	4	5	7	6	8	21.2	73.027
SPCS2	Signal peptidase complex subunit 2	A0A087WUC6;E9PI68;Q15005;E9PRB9;E9PL01;H0YE04	A0A087WUC6;E9PI68;Q15005;E9PRB9;E9PL01;H0YE04	21.8554	22.1952	23.2707	21.6477	21.8591	21.4503	21.641	21.7001	21.581	21.9203	4.5554	40601000	7	0	1	2	1	1	1	0	0	0	1	12.8	25.09
SYMPK	Symplekin	M0R3C7;A0A087WUE9;Q92797-2;Q92797;M0R1C2;M0R180;M0QXP5	M0R3C7;A0A087WUE9;Q92797-2;Q92797;M0R1C2;M0R180;M0QXP5	21.4095	21.5143	20.9976	21.4637	21.5073	21.4164	21.3015	NaN	21.4194	21.2744	4.5099	23182000	6	1	1	2	0	1	0	0	0	0	1	4	74.538
IGHG1;IGHG3	Ig gamma-1 chain C region;Ig gamma-3 chain C region	A0A0A0MS07;A0A0A0MS08;A0A087WYC5;A0A087WYE1;A0A087X079;A0A087WV47;A0A0G2JNK4;A0A087X010;A0A087X1C7;P01857;A0A075B6N8;A0A087WVW2;P01860;A0A087WXL8;A0A0G2JN06;A0A0G2JPD4;P01861;P01859	A0A0A0MS07;A0A0A0MS08;A0A087WYC5;A0A087WYE1;A0A087X079;A0A087WV47;A0A0G2JNK4;A0A087X010;A0A087X1C7;P01857;A0A075B6N8;A0A087WVW2;P01860;A0A087WXL8	NaN	24.54	25.9297	24.4925	24.7629	25.0119	25.1929	23.8597	24.459	23.9759	5.0433	289330000	20	1	2	2	2	2	2	3	1	1	2	14.9	31.983
MKI67	Antigen KI-67	A0A087WV66;P46013;P46013-2	A0A087WV66;P46013;P46013-2	26.1653	26.3838	26.562	26.0103	26.4633	26.4524	25.9134	26.3765	26.3917	26.2961	66.894	758630000	126	10	16	19	13	11	8	9	11	8	21	14.7	358.62
NOP2	Probable 28S rRNA (cytosine(4447)-C(5))-methyltransferase	A0A087WV73;P46087;P46087-4;P46087-2;P46087-3;F5GYR3;F5GWB7;F5H709;F5H5X6	A0A087WV73;P46087;P46087-4;P46087-2;P46087-3	25.835	26.0255	25.9718	26.0814	25.814	25.5344	25.8642	25.306	26.3555	25.9946	72.779	559160000	88	9	9	10	12	10	3	8	9	7	11	19.1	94.095
CLTC	Clathrin heavy chain;Clathrin heavy chain 1	A0A087WVQ6;Q00610-2;Q00610;J3KS13;K7EJJ5	A0A087WVQ6;Q00610-2;Q00610	24.1957	24.3851	24.0255	23.8956	23.9834	23.6416	23.6949	24.9076	23.8468	24.3462	26.733	190090000	27	4	3	3	1	2	2	1	5	1	3	5.2	192.06
POLR2E	DNA-directed RNA polymerases I, II, and III subunit RPABC1	A0A087WWX0;A0A087WVZ9;A0A0A0MQR7;P19388;A0A087WVN5	A0A087WWX0;A0A087WVZ9;A0A0A0MQR7;P19388;A0A087WVN5	NaN	22.9039	23.1593	22.5215	22.7892	22.7177	23.4055	23.1078	24.0986	23.2812	7.5177	78483000	11	1	2	0	0	1	0	1	1	3	2	29.9	15.421
YTHDF2	YTH domain-containing family protein 2	A0A087WXZ3;Q9Y5A9;Q9Y5A9-2;S4R3J8;S4R3V3	A0A087WXZ3;Q9Y5A9;Q9Y5A9-2	27.6469	27.6342	27.4406	27.6183	27.5327	28.0195	27.9837	27.6862	27.752	27.5767	119.15	2019200000	97	10	8	10	11	11	10	7	10	7	9	24.4	61.163
PKP1	Plakophilin-1	A0A087WYY6;Q13835-2;Q13835	A0A087WYY6;Q13835-2;Q13835	NaN	23.09	23.4536	24.0427	24.0523	24.9754	24.9504	22.7079	23.3049	23.4198	38.81	162620000	24	0	1	2	2	2	4	3	1	1	1	9.9	80.532
RPS16;ZNF90	40S ribosomal protein S16	M0R210;A0A087WZ27;P62249;M0R3H0;M0QX76;M0R1M5;Q6IPX4	M0R210;A0A087WZ27;P62249;M0R3H0;M0QX76;M0R1M5;Q6IPX4	22.2282	23.4016	22.9911	23.2514	23.0978	23.091	23.2118	23.9803	23.5986	23.602	7.516	100160000	15	2	2	1	3	1	0	0	3	1	2	40.3	14.419
HNRNPAB	Heterogeneous nuclear ribonucleoprotein A/B	D6R9P3;D6RD18;D6RBZ0;A0A087WZV1;Q99729-3;Q99729-2;Q99729-4;Q99729	D6R9P3;D6RD18;D6RBZ0;A0A087WZV1;Q99729-3;Q99729-2;Q99729-4;Q99729	28.6744	28.1786	28.3345	28.0424	28.138	28.9088	29.0847	28.8462	28.6477	28.4775	76.679	3916200000	41	4	4	5	2	2	2	3	6	3	4	24.6	30.302
SF3B2	Splicing factor 3B subunit 2	A0A087WZZ5;Q13435;E9PPJ0;E9PJ04;H0YCG1;E9PJT3;E9PIL8;H0YEX5	A0A087WZZ5;Q13435;E9PPJ0;E9PJ04;H0YCG1	25.8366	25.7178	25.8946	26.0777	25.6164	25.9507	25.5686	26.0624	25.496	25.896	32.81	573210000	48	5	6	7	7	4	3	3	5	3	5	13.2	97.584
DDX1	ATP-dependent RNA helicase DDX1	F1T0B3;A0A087X2G1;Q92499;Q92499-3;Q92499-2	F1T0B3;A0A087X2G1;Q92499;Q92499-3;Q92499-2	24.3968	24.4524	24.0509	24.6691	24.5957	24.7387	24.7128	24.404	24.6584	24.584	20.628	244390000	30	3	3	4	3	5	3	2	2	3	2	11.4	73.915
VDAC2	Voltage-dependent anion-selective channel protein 2	A0A0A0MR02;P45880-2;P45880;P45880-1;Q5JSD2;Q5JSD1;A2A3S1	A0A0A0MR02;P45880-2;P45880;P45880-1;Q5JSD2;Q5JSD1	25.5987	25.2725	25.4694	25.1839	24.827	25.116	25.4251	25.2111	25.6081	24.6895	20.589	373530000	34	4	5	6	4	2	1	2	3	2	3	24.8	30.348
PUM2;PUM1	Pumilio homolog 2;Pumilio homolog 1	Q8TB72-3;Q8TB72-4;A0A0A0MR59;A0A0C4DG68;Q14671-2;Q14671-4;Q8TB72;Q14671;Q8TB72-2;E9PR38;H0YDK8;Q14671-3;Q5T1Z8;H0YEH2;Q5T1Z4;H0YC97;H0YDC5	Q8TB72-3;Q8TB72-4;A0A0A0MR59;A0A0C4DG68;Q14671-2;Q14671-4;Q8TB72;Q14671;Q8TB72-2;E9PR38;H0YDK8;Q14671-3;Q5T1Z8;H0YEH2;Q5T1Z4	NaN	23.4144	23.4268	NaN	23.0961	23.774	23.2528	23.3825	24.0016	22.9831	5.5077	89577000	9	0	0	1	0	1	1	1	2	2	1	4.1	114
RBM10	RNA-binding protein 10	A0A0A0MR66;P98175-4;P98175-3;P98175-2;P98175	A0A0A0MR66;P98175-4;P98175-3;P98175-2;P98175	23.5221	23.092	23.2661	24.1395	23.9294	23.6703	23.7682	23.6786	23.924	23.7426	15.975	128240000	18	2	2	1	2	2	1	1	1	2	4	6.1	110.36
HNRNPUL1	Heterogeneous nuclear ribonucleoprotein U-like protein 1	A0A0A0MRA5;B7Z4B8;Q9BUJ2-4;Q9BUJ2-2;Q9BUJ2;M0R3F1;Q9BUJ2-3;M0QYZ0;Q9BUJ2-5;M0R203;M0QZV6;M0R0K8;M0QYM5;M0QYI8	A0A0A0MRA5;B7Z4B8;Q9BUJ2-4;Q9BUJ2-2;Q9BUJ2;M0R3F1;Q9BUJ2-3	27.3052	27.298	27.158	27.1999	27.2837	27.1207	27.4415	27.4477	27.6178	27.4517	90.248	1692500000	79	6	5	9	9	8	7	8	9	6	9	15.7	85.939
SYNE2	Nesprin-2	Q8WXH0-2;A0A0A0MRE3;G3V5X4;Q8WXH0;A0A0C4DGK3;Q8WXH0-7;Q8WXH0-3;Q8WXH0-13;Q8WXH0-4;Q8WXH0-10;Q8WXH0-5;Q8WXH0-12;G3V403;G3V4T3;A0A0C4DH87;Q8WXH0-11;Q8WXH0-6;G3V5D3	Q8WXH0-2;A0A0A0MRE3;G3V5X4;Q8WXH0	24.4573	24.5727	25.4547	24.5524	24.7067	24.0777	24.3782	24.4798	24.52	24.6376	33.633	248250000	46	4	4	14	5	3	0	0	7	1	8	4	798.85
NOLC1	Nucleolar and coiled-body phosphoprotein 1	A0A0A0MRM9;Q14978;Q14978-3;Q14978-2;S4R402;S4R341;S4R349;S4R3C2	A0A0A0MRM9;Q14978;Q14978-3;Q14978-2	23.4763	23.8571	22.7293	23.5397	23.8987	24.5942	24.0623	23.2728	24.6042	23.4931	10.379	133120000	31	4	3	2	5	2	3	2	2	4	4	8.6	74.543
SNRPC	U1 small nuclear ribonucleoprotein C	P09234;A0A0A0MRR7;Q5TAL2	P09234;A0A0A0MRR7;Q5TAL2	21.8395	22.0092	22.103	22.4968	22.5517	22.3899	21.6446	23.3235	22.671	22.7113	6.1786	57075000	13	1	1	1	1	2	1	1	2	1	2	13.2	17.394
PRDX1	Peroxiredoxin-1	Q06830;A0A0A0MSI0;A0A0A0MRQ5	Q06830;A0A0A0MSI0	28.7858	28.8704	28.963	28.844	28.9071	28.9928	29.0761	29.0614	29.0635	28.9922	56.362	5109600000	101	9	11	10	9	8	7	7	8	10	11	44.7	22.11
TOR1AIP1	Torsin-1A-interacting protein 1	A0A0A0MSK5;Q5JTV8;H0YD16;H0YDU3;H0Y4R4	A0A0A0MSK5;Q5JTV8;H0YD16	24.9968	25.3365	24.8227	25.4034	25.2315	25.6041	25.5776	24.9357	25.6106	25.0375	58.86	360320000	44	6	6	3	4	5	4	5	4	4	3	22.7	52.406
WDR36	WD repeat-containing protein 36	A0A0A0MTB8;Q8NI36	A0A0A0MTB8;Q8NI36	23.0413	23.0556	22.9071	23.5373	23.0138	23.4934	23.5525	23.7723	24.0405	23.671	4.2247	102340000	13	2	1	1	1	1	1	1	2	2	1	2.9	99.365
ADSL	Adenylosuccinate lyase	A0A0A6YY92;P30566;B4DEP1;A0A096LP72;A0A096LNY4;A0A096LNY5;P30566-2;A0A096LNY6	A0A0A6YY92;P30566;B4DEP1;A0A096LP72;A0A096LNY4;A0A096LNY5;P30566-2	22.974	23.158	22.127	23.0048	22.9347	23.6282	23.038	22.595	23.3774	22.6543	5.6438	82960000	18	3	3	1	1	2	2	1	1	2	2	6.6	56.216
PWP2	Periodic tryptophan protein 2 homolog	A0A0B4J2E5;Q15269;C9J544	A0A0B4J2E5;Q15269;C9J544	25.9153	27.3498	27.6768	26.9299	26.9263	26.6617	26.9281	27.0058	27.2603	27.3666	7.4984	1378000000	16	2	2	4	1	1	1	2	1	1	1	7	102.45
SEC13	Protein SEC13 homolog	A0A0C4DFR6;P55735-2;P55735;P55735-3;A8MXL6;E7ERC8	A0A0C4DFR6;P55735-2;P55735;P55735-3;A8MXL6	25.7657	25.7902	25.8573	25.34	25.6204	24.981	25.2347	25.3651	25.5868	25.7155	22.168	451210000	17	2	2	2	2	2	1	0	2	1	3	22.8	35.857
RPSA	40S ribosomal protein SA	C9J9K3;A0A0C4DG17;P08865;F8WD59	C9J9K3;A0A0C4DG17;P08865;F8WD59	24.854	25.0464	25.2556	24.7991	24.8798	25.127	24.8928	24.9978	25.1094	25.4408	19.686	326100000	35	3	4	5	4	3	3	3	2	3	4	23.6	29.404
DDOST	Dolichyl-diphosphooligosaccharide--protein glycosyltransferase 48 kDa subunit	A0A0C4DGS1;P39656;P39656-2;P39656-3;U3KQ84	A0A0C4DGS1;P39656;P39656-2;P39656-3;U3KQ84	24.8825	25.1059	25.5114	23.9342	24.9479	25.0954	24.4752	24.9968	24.5845	24.4911	23.351	285880000	24	2	4	6	0	2	2	1	2	1	4	16.2	48.799
POLR2A	DNA-directed RNA polymerase;DNA-directed RNA polymerase II subunit RPB1	A0A0C4DGZ0;P24928;A0A087WWE2;P24928-2	A0A0C4DGZ0;P24928;A0A087WWE2	23.8482	23.6175	23.6262	23.3911	23.5581	23.5268	23.7683	23.49	24.4205	24.5133	19.112	133610000	29	3	4	4	2	4	2	2	1	4	3	5.1	217.2
DDX3X;DDX3Y	ATP-dependent RNA helicase DDX3X;ATP-dependent RNA helicase DDX3Y	A0A0D9SG12;A0A0D9SFB3;O00571;O00571-2;A0A0D9SF53;O15523;O15523-2;A0A0J9YVQ7;O15523-3;A0A087WVZ1;A0A0J9YYH6;C9J081;B4DLA0;D6RCM4;A0A087WX09;C9J8G5;Q9NQI0-2;Q9NQI0-4;Q9NQI0;Q9NQI0-3;H0Y960	A0A0D9SG12;A0A0D9SFB3;O00571;O00571-2;A0A0D9SF53;O15523;O15523-2	26.8787	26.9437	27.1688	27.2299	26.9489	27.0594	27.2078	26.8655	27.3879	26.9557	81.327	1325100000	126	13	14	16	14	12	9	8	13	10	17	30.4	71.54
MYO18A	Unconventional myosin-XVIIIa	A0A0D9SFK2;Q92614-3;Q92614-4;Q92614;Q92614-2;Q92614-5;H0YEV9	A0A0D9SFK2;Q92614-3;Q92614-4;Q92614;Q92614-2;Q92614-5	23.3843	NaN	24.09	24.2921	23.6441	23.7496	23.7999	23.5264	24.2282	23.9631	8.5401	131020000	17	1	2	1	1	1	1	0	2	2	6	4.4	231.1
HSPA1B;HSPA1A	Heat shock 70 kDa protein 1B;Heat shock 70 kDa protein 1A	A0A0G2JIW1;P0DMV9;P0DMV8;P0DMV8-2;V9GZ37	A0A0G2JIW1;P0DMV9;P0DMV8;P0DMV8-2;V9GZ37	26.0553	27.2314	25.7895	27.114	27.1984	27.0296	25.8294	29.6066	26.9398	28.6801	105.03	2777900000	108	4	10	5	9	8	3	6	26	7	17	30.8	70.108
DDX39A;DDX39B	ATP-dependent RNA helicase DDX39A;Spliceosome RNA helicase DDX39B	A0A0G2JJZ9;O00148;Q13838;Q13838-2;F6S4E6;A0A0A0MT12;F6TRA5;K7EQN7;F6WLT2;Q5STU3;O00148-3;O00148-2;F6UJC5;H0Y400;K7EPJ3	A0A0G2JJZ9;O00148;Q13838;Q13838-2;F6S4E6;A0A0A0MT12;F6TRA5;K7EQN7;F6WLT2;Q5STU3;O00148-3;O00148-2;F6UJC5	24.4898	24.4207	24.2274	24.2536	24.0946	24.0611	24.2994	24.7249	24.0725	24.5106	11.082	219570000	37	5	3	3	3	3	3	4	5	3	4	15.9	38.125
HCFC1	Host cell factor 1;HCF N-terminal chain 1;HCF N-terminal chain 2;HCF N-terminal chain 3;HCF N-terminal chain 4;HCF N-terminal chain 5;HCF N-terminal chain 6;HCF C-terminal chain 1;HCF C-terminal chain 2;HCF C-terminal chain 3;HCF C-terminal chain 4;HCF C-terminal chain 5;HCF C-terminal chain 6	A6NEM2;P51610-2;P51610;P51610-4;P51610-3	A6NEM2;P51610-2;P51610;P51610-4;P51610-3	21.6064	21.6947	21.7087	20.9902	21.2851	21.6231	NaN	22.0136	22.1002	22.2383	9.593	32574000	10	0	2	2	1	0	0	0	2	1	2	2.9	213.47
HN1L	Hematological and neurological expressed 1-like protein	H3BMT0;H3BTV5;H3BU16;A6NGP5;H3BMV3;Q9H910-2;Q9H910;Q9H910-3;H3BMM8;B4E1P3	H3BMT0;H3BTV5;H3BU16;A6NGP5;H3BMV3;Q9H910-2;Q9H910;Q9H910-3	23.7893	24.077	24.1255	24.2095	24.1043	23.9888	23.9461	23.8673	24.0945	24.1447	13.372	161400000	19	1	2	3	3	3	1	1	2	1	2	39.1	12.23
SNRPN;SNRPB	Small nuclear ribonucleoprotein-associated proteins B and B;Small nuclear ribonucleoprotein-associated protein N	J3QLE5;A8MT02;P14678-2;P63162;P14678;P63162-2;P14678-3;J3KRY3;S4R3P3	J3QLE5;A8MT02;P14678-2;P63162;P14678;P63162-2;P14678-3;J3KRY3;S4R3P3	NaN	23.5662	23.8355	23.6943	24.9826	NaN	24.3259	24.1869	24.3699	25.0005	4.2991	172570000	20	2	3	2	2	2	1	2	2	2	2	13	17.546
RPL23A	60S ribosomal protein L23a	H7BY10;K7EJV9;K7ERT8;A8MUS3;P62750;K7EMA7	H7BY10;K7EJV9;K7ERT8;A8MUS3;P62750;K7EMA7	24.3952	24.9596	24.8576	25.0501	24.5509	24.8723	NaN	25.2623	25.3231	24.9799	5.4665	296440000	13	0	2	3	2	0	1	1	1	1	1	19.6	17.692
MATR3	Matrin-3	P43243;A8MXP9;D6REM6;D6R991;P43243-2;B3KM87;H0Y8T4;Q68E03;D6RBK5;D6RIA2;D6RE02;D6RB45;A0A0K0K1G4;D6R8Z5;D6REK4;D6RCM3;D6RBS2;D6RAY2;D6RAM9;D6R9F3;D6RBI2	P43243;A8MXP9;D6REM6;D6R991	26.6518	26.6195	26.7965	26.6245	26.3511	26.4137	26.3005	26.5869	26.3217	26.44	92.691	930100000	85	9	10	8	9	8	7	8	11	4	7	17.6	94.622
SMPD4	Sphingomyelin phosphodiesterase 4	Q9NXE4-4;Q9NXE4-2;B1PBA3;H7BXF4;Q9NXE4;Q9NXE4-3;Q9NXE4-8;Q9NXE4-6;Q9NXE4-7;Q9NXE4-10;H7C1Q6;Q9NXE4-9;Q9NXE4-5;C9J647;H7C0W5;H7C235;F2Z2I0;F2Z2W5;F8WF03	Q9NXE4-4;Q9NXE4-2;B1PBA3;H7BXF4;Q9NXE4;Q9NXE4-3;Q9NXE4-8;Q9NXE4-6;Q9NXE4-7;Q9NXE4-10;H7C1Q6;Q9NXE4-9;Q9NXE4-5	23.5942	22.9849	23.8999	23.3582	23.6392	22.8885	23.4198	23.2382	23.3847	22.885	5.558	96436000	13	2	0	2	2	2	1	0	3	1	0	7.1	98.147
HIST1H2BI;HIST1H2BN;HIST1H2BL;HIST1H2BM;HIST1H2BH;HIST2H2BF;HIST1H2BC;HIST1H2BD;H2BFS;HIST1H2BK;HIST1H2BA	Histone H2B;Histone H2B type 1-L;Histone H2B type 1-M;Histone H2B type 1-N;Histone H2B type 1-H;Histone H2B type 2-F;Histone H2B type 1-C/E/F/G/I;Histone H2B type 1-D;Histone H2B type F-S;Histone H2B type 1-K;Histone H2B type 1-A	B2R4S9;U3KQK0;Q99880;Q99879;Q99877;Q93079;Q5QNW6;P62807;P58876;P57053;O60814;Q5QNW6-2;Q96A08	B2R4S9;U3KQK0;Q99880;Q99879;Q99877;Q93079;Q5QNW6;P62807;P58876;P57053;O60814;Q5QNW6-2;Q96A08	31.1061	31.9022	31.4449	31.4573	31.3691	32.0589	31.9193	31.9231	31.9355	31.9239	63.792	32326000000	154	14	15	17	13	16	13	12	18	13	17	47.6	13.906
HNRNPC	Heterogeneous nuclear ribonucleoproteins C1/C2	G3V4C1;B2R5W2;P07910-2;P07910;G3V2Q1;B4DY08;G3V4W0;P07910-4;G3V576;P07910-3;G3V2D6;G3V575;G3V555;G3V251;G3V5X6;G3V5V7;G3V3K6;B4DSU6;B2RXH8;A0A0G2JNQ3;A0A0G2JPF8;O60812;B7ZW38;P0DMR1;G3V4M8;G3V2H6;B3KT61;E5RG71;Q86SE5-3;Q86SE5	G3V4C1;B2R5W2;P07910-2;P07910;G3V2Q1;B4DY08;G3V4W0;P07910-4;G3V576;P07910-3;G3V2D6;G3V575;G3V555;G3V251;G3V5X6;G3V5V7;G3V3K6	27.8198	27.981	28.1373	27.9642	27.6728	27.7464	27.9523	27.7037	27.9129	28.1725	289.69	2732700000	133	11	18	15	14	12	9	10	15	11	14	53.4	32.238
MSI2	RNA-binding protein Musashi homolog 2	B4DHE8;Q96DH6-2;Q96DH6;J3KTC1;B4DM51;Q96DH6-3;J3QKT5;H0YHB7;O43347	B4DHE8;Q96DH6-2;Q96DH6;J3KTC1;B4DM51;Q96DH6-3	23.7709	23.1807	24.5147	22.3581	22.6778	22.2329	22.8429	23.4634	22.1114	23.3198	7.3055	104700000	13	2	2	2	0	0	0	1	2	0	2	15.1	34.812
SEC61A1;SEC61A2	Protein transport protein Sec61 subunit alpha isoform 1;Protein transport protein Sec61 subunit alpha isoform 2	B4DR61;P61619;F8W776;Q8TC24;P61619-3;Q9H9S3-2;Q9H9S3-3;Q9H9S3;H7C1Q9;C9JXC6;H7C069;A6NK38;F2Z2C7;A6NIF9;C9JJV4	B4DR61;P61619;F8W776;Q8TC24;P61619-3;Q9H9S3-2;Q9H9S3-3;Q9H9S3	24.7042	25.0098	24.2266	25.0556	24.8053	25.1491	24.9729	24.1643	24.8795	24.2982	7.8346	260480000	15	1	2	3	2	2	1	1	1	1	1	6.4	52.949
CCT3	T-complex protein 1 subunit gamma	B4DUR8;P49368;P49368-2;Q5SZX6;E9PRC8;E9PQ35;Q5SZX9;Q5SZW8;E9PM09	B4DUR8;P49368;P49368-2;Q5SZX6	22.3152	23.6835	24.2159	24.209	24.2579	23.9881	24.1547	24.6911	23.3696	24.6504	12.126	199530000	28	1	2	3	2	3	3	1	5	1	5	16.4	55.674
UBC;UBB;RPS27A;UBA52	Polyubiquitin-C;Ubiquitin;Ubiquitin-60S ribosomal protein L40;Ubiquitin;60S ribosomal protein L40;Ubiquitin-40S ribosomal protein S27a;Ubiquitin;40S ribosomal protein S27a;Polyubiquitin-B;Ubiquitin	P0CG48;F5GYU3;Q96C32;Q5PY61;J3QKN0;F5GXK7;F5H747;F5H388;B4DV12;F5H265;F5H2Z3;F5H6Q2;J3QTR3;J3QS39;P62987;P62979;P0CG47;M0R2S1;M0R1M6;M0R1V7;F5GZ39;J3QSA3	P0CG48;F5GYU3;Q96C32;Q5PY61;J3QKN0;F5GXK7;F5H747;F5H388;B4DV12;F5H265;F5H2Z3;F5H6Q2;J3QTR3;J3QS39;P62987;P62979;P0CG47;M0R2S1;M0R1M6;M0R1V7;F5GZ39;J3QSA3	28.4462	28.676	28.3123	28.1129	28.0363	28.2557	28.1999	28.1497	28.211	27.9792	47.503	3030500000	55	6	7	5	6	4	3	3	7	5	5	61.8	77.038
ILF2	Interleukin enhancer-binding factor 2	B4DY09;Q12905;X6R6Z1;A0A0A0MRL0	B4DY09;Q12905	25.6511	25.2089	25.662	25.1031	25.077	24.8105	25.3235	24.5359	24.9854	25.27	24.825	379190000	35	6	2	4	3	3	2	3	5	3	4	28.7	38.91
BZW2	Basic leucine zipper and W2 domain-containing protein 2	B5MCH7;E7ETZ4;Q9Y6E2;E9PFD4;B5MCE7;Q75MG1;E7EMS9;C9JF98;Q9Y6E2-2	B5MCH7;E7ETZ4;Q9Y6E2;E9PFD4;B5MCE7;Q75MG1	NaN	23.1421	23.6992	23.603	23.4087	23.547	23.9556	23.6172	23.8907	23.312	12.073	108200000	17	0	1	3	1	1	1	2	3	2	3	21.6	39.445
RAN	GTP-binding nuclear protein Ran	B5MDF5;P62826;J3KQE5;F5H018;H0YFC6;B4DV51;A0A087X0W0	B5MDF5;P62826;J3KQE5;F5H018;H0YFC6	26.5962	26.8647	26.8637	26.5661	26.4621	26.8706	27.01	26.7833	27.079	26.5728	30.332	1078700000	44	3	5	5	4	4	4	4	5	3	4	27.5	26.224
SUMO1	Small ubiquitin-related modifier 1	B8ZZN6;P63165;B8ZZ67;P63165-2;B8ZZJ0;B9A032	B8ZZN6;P63165;B8ZZ67;P63165-2	23.1166	23.392	23.5908	23.9256	23.2804	22.8313	23.3539	22.7181	22.5	23.2975	5.5325	100010000	18	2	2	2	1	2	1	2	2	1	3	21.9	16.645
IMMT	MICOS complex subunit MIC60	B9A067;Q16891-3;Q16891-2;Q16891-4;Q16891;C9J406;H7C463;A0A087WYS0;D6RAW4	B9A067;Q16891-3;Q16891-2;Q16891-4;Q16891;C9J406;H7C463	26.6328	26.8636	26.6763	26.9241	26.6067	26.6839	26.5693	26.3423	26.7965	26.3675	88.394	1006000000	84	7	9	12	9	7	7	7	8	8	10	21	78.973
RBM12B	RNA-binding protein 12B	B9ZVT1;Q8IXT5	B9ZVT1;Q8IXT5	NaN	22.5095	22.6445	22.9365	22.472	21.9615	22.3635	22.2843	22.4924	22.7154	4.8147	52082000	16	1	2	3	2	2	2	1	1	1	1	5	102.7
POLR2B	DNA-directed RNA polymerase;DNA-directed RNA polymerase II subunit RPB2	C9J4M6;C9J2Y9;P30876	C9J4M6;C9J2Y9;P30876	23.3439	23.2126	23.0123	22.9025	23.2023	23.3724	23.3953	22.5542	23.1776	23.374	14.968	86804000	28	3	2	5	4	1	2	2	3	2	4	8.2	125.19
NIFK	MKI67 FHA domain-interacting nucleolar phosphoprotein	H7BZL0;C9J808;Q9BYG3	H7BZL0;C9J808;Q9BYG3	23.0088	22.8154	22.9919	22.8315	22.8323	22.252	23.1935	22.8285	22.8162	23.0218	8.0707	70566000	16	1	1	2	2	2	1	2	2	1	2	27.5	11.741
FGG	Fibrinogen gamma chain	C9JEU5;C9JC84;P02679-2;P02679;C9JPQ9;C9JU00	C9JEU5;C9JC84;P02679-2;P02679;C9JPQ9;C9JU00	27.3731	26.7484	26.6988	26.9412	26.5782	26.7304	27.0127	26.1811	27.031	25.9582	57.195	1080000000	72	8	8	4	10	7	6	6	3	6	6	24.7	50.322
CPSF4	Cleavage and polyadenylation specificity factor subunit 4	C9JEV9;O95639-3;O95639-2;O95639;B7Z7B0;H7C419;F8WEL7	C9JEV9;O95639-3;O95639-2;O95639;B7Z7B0;H7C419	NaN	22.5044	23.1371	22.7566	22.5667	22.4374	22.3912	22.3953	22.4109	23.3411	12.444	62371000	10	1	1	2	1	1	0	0	1	1	2	24.2	23.653
CHCHD3	MICOS complex subunit MIC19	C9JRZ6;F8WAR4;Q9NX63;F8WD73	C9JRZ6;F8WAR4;Q9NX63	24.5244	25.1917	24.2552	24.9203	24.3954	24.8069	25.1044	24.8645	24.497	24.4895	16.323	274650000	22	2	4	3	1	2	2	2	2	2	2	28.4	26.694
RPL35A	60S ribosomal protein L35a	C9K025;P18077;F8WBS5;F8WB72	C9K025;P18077;F8WBS5;F8WB72	23.9159	23.9055	23.8881	22.9411	23.5743	23.8822	23.6651	24.5675	22.0432	23.5517	8.7083	134430000	22	2	2	2	2	2	3	2	4	1	2	37.2	10.645
RPS3A	40S ribosomal protein S3a	D6RB09;E9PFI5;D6RG13;D6RAT0;P61247;H0Y8L7;H0Y9Y4;D6RED7;D6RAS7;D6R9B6;D6RGE0;D6RI02	D6RB09;E9PFI5;D6RG13;D6RAT0;P61247;H0Y8L7;H0Y9Y4;D6RED7;D6RAS7;D6R9B6	26.039	26.3801	25.0443	26.0648	25.9295	26.1223	26.0346	26.6574	26.2545	25.836	8.547	589070000	26	2	3	2	3	0	3	2	4	3	3	20.2	22.459
RPL14	60S ribosomal protein L14	E7EPB3;P50914	E7EPB3;P50914	23.6631	24.0262	24.0389	23.6637	23.0106	23.3709	23.6217	NaN	23.7837	23.8503	8.3589	109610000	14	2	2	2	1	2	1	1	1	0	2	18.5	14.558
BPTF	Nucleosome-remodeling factor subunit BPTF	E7ETD6;Q12830-4;Q12830-2;Q12830;F5GXF5;J3QQK4;A0A0A0MR81;J3KSY0	E7ETD6;Q12830-4;Q12830-2;Q12830;F5GXF5	23.0363	23.9036	23.1679	23.5589	24.3291	23.8948	25.0687	25.2015	25.2364	24.901	27.122	208780000	41	0	0	0	1	4	1	5	9	10	10	6.4	308.07
CYFIP2;CYFIP1	Cytoplasmic FMR1-interacting protein 2;Cytoplasmic FMR1-interacting protein 1	Q96F07;Q96F07-2;E7EVJ5;H7C229;E7EW33;Q7L576;A0A087WWZ1;A0A0G2JR96;A0A0G2JQT1;A0A0G2JRV9;Q7L576-2;A0A087WU52;Q7L576-3;A0A087WTQ3;A0A087WVE1;H0YL50;A0A087WWL1;A0A0G2JRX2	Q96F07;Q96F07-2;E7EVJ5;H7C229;E7EW33;Q7L576	24.0118	23.8376	23.7705	24.2638	23.7084	24.18	23.8408	24.139	24.1993	24.0547	11.594	182370000	35	3	3	2	4	5	3	2	5	3	5	5.1	148.4
CSTF2	Cleavage stimulation factor subunit 2	E9PID8;E7EWR4;P33240-2;P33240;A0A0A0MT56	E9PID8;E7EWR4;P33240-2;P33240;A0A0A0MT56	23.4022	23.7321	23.4176	24.3119	23.8447	23.9603	23.7541	23.2713	23.7005	23.3987	8.8062	127890000	19	2	3	0	3	3	2	2	1	1	2	10.5	46.665
PAICS	Multifunctional protein ADE2;Phosphoribosylaminoimidazole-succinocarboxamide synthase;Phosphoribosylaminoimidazole carboxylase	E9PBS1;P22234;P22234-2;D6RF62	E9PBS1;P22234;P22234-2;D6RF62	26.7064	26.6067	26.9837	26.5863	26.6425	26.8696	26.492	26.6543	26.885	26.84	70.155	1133800000	91	11	10	12	8	8	7	6	8	5	12	36.6	45.651
HNRNPH1	Heterogeneous nuclear ribonucleoprotein H;Heterogeneous nuclear ribonucleoprotein H, N-terminally processed	P31943;G8JLB6;E9PCY7;D6RIU0;D6RBM0;D6RIH9;D6RAM1;D6RJ04;D6R9T0;D6RFM3;D6RIT2;D6RDU3;E7EQJ0;E7EN40;D6RDL0;H0YB39;H0YBD7;E5RGH4;H0YBG7;D6RF17;D6R9D3;H0YAQ2;E5RJ94	P31943;G8JLB6;E9PCY7;D6RIU0;D6RBM0;D6RIH9;D6RAM1;D6RJ04;D6R9T0;D6RFM3;D6RIT2;D6RDU3;E7EQJ0	29.8256	29.8503	30.1517	29.1708	29.3348	28.5474	29.3074	29.1995	28.5508	29.3781	160.24	8161800000	247	24	27	27	23	25	19	18	25	15	28	43.2	49.229
SMC4	Structural maintenance of chromosomes protein;Structural maintenance of chromosomes protein 4	E9PD53;Q9NTJ3;Q9NTJ3-2;C9JR83	E9PD53;Q9NTJ3;Q9NTJ3-2	22.1326	22.6078	22.5855	23.1135	NaN	22.1979	22.6822	NaN	22.6919	22.3657	8.9569	54468000	15	1	1	4	2	1	1	0	3	1	1	5.7	144.45
FUBP1	Far upstream element-binding protein 1	E9PEB5;Q96AE4;Q96AE4-2;C9JSZ1;M0R251;M0R263	E9PEB5;Q96AE4;Q96AE4-2	24.4842	24.1532	24.4824	24.2315	24.1733	24.2706	24.3427	24.0855	24.7638	24.6604	13.793	226320000	35	5	5	2	4	3	1	2	3	3	3	12.8	68.903
RPL27A	60S ribosomal protein L27a	E9PJD9;E9PLL6;P46776;E9PLX7	E9PJD9;E9PLL6;P46776	24.986	24.9121	24.1061	24.4839	24.6344	25.0091	24.8301	25.1499	24.9066	25.0315	9.3104	285520000	23	2	2	2	2	2	2	3	3	3	1	36.3	10.127
SEC16A	Protein transport protein Sec16A	F1T0I1;J3KNL6;O15027-2;O15027-4;O15027-3;O15027;O15027-5;A0A0C4DH09;X6RGP5;Q8N9G1	F1T0I1;J3KNL6;O15027-2;O15027-4;O15027-3;O15027;O15027-5;A0A0C4DH09;X6RGP5	23.4651	23.6332	23.4798	23.4466	23.3675	23.8361	23.6282	23.2065	23.3022	23.3665	9.6714	108630000	19	1	2	4	3	1	1	2	1	1	3	4.5	249.48
HADHB	Trifunctional enzyme subunit beta, mitochondrial;3-ketoacyl-CoA thiolase	F5GZQ3;P55084-2;P55084;B5MD38	F5GZQ3;P55084-2;P55084;B5MD38	22.4063	22.6891	22.7383	22.4584	22.4225	21.8728	NaN	22.7505	22.6748	22.2535	4.1054	53066000	6	0	0	2	1	2	0	0	1	0	0	4.8	49.597
MTHFD1	C-1-tetrahydrofolate synthase, cytoplasmic;Methylenetetrahydrofolate dehydrogenase;Methenyltetrahydrofolate cyclohydrolase;Formyltetrahydrofolate synthetase;C-1-tetrahydrofolate synthase, cytoplasmic, N-terminally processed	F5H2F4;P11586	F5H2F4;P11586	NaN	23.4892	23.5533	23.2911	23.5051	23.2026	23.036	24.7642	23.2771	24.0535	23.485	119610000	13	0	2	1	0	1	1	0	5	0	3	6.8	110.61
SEC23A	Protein transport protein Sec23A	F5H365;Q15436;G3V4V1;G3V1W4;G3V3G5;G3V2R6;Q15436-2;G3V5K1;G3V5X8;G3V4Q2	F5H365;Q15436;G3V4V1;G3V1W4;G3V3G5;G3V2R6;Q15436-2	22.4689	22.5673	23.0117	22.5726	22.8261	22.6611	22.8126	22.6437	22.0658	23.059	7.2056	63575000	13	1	1	2	2	2	0	0	1	1	3	6.9	82.968
CPSF7	Cleavage and polyadenylation specificity factor subunit 7	F5H669;Q8N684-2;Q8N684;Q8N684-3;F5H6M0;F5H047;J3QT54;C9JM38;C9J286;C9J323;F5H5B7;F5H1W4;F5H2K8;F5H6P5;F5H6A8;F5GXA3	F5H669;Q8N684-2;Q8N684;Q8N684-3;F5H6M0;F5H047;J3QT54	24.79	25.3151	24.9094	25.2534	24.9841	24.8847	25.0165	24.6034	25.1658	24.8797	58.527	299940000	42	5	7	4	5	4	3	1	4	5	4	20.1	41.265
CAD	CAD protein;Glutamine-dependent carbamoyl-phosphate synthase;Aspartate carbamoyltransferase;Dihydroorotase	P27708;F8VPD4;H7C2E4	P27708;F8VPD4	24.1996	24.6658	24.6639	24.8674	24.7613	25.0225	24.6275	24.7756	25.0632	25.0309	20.945	296340000	39	2	4	3	5	5	3	4	3	4	6	5.4	242.98
AAAS	Aladin	H3BU82;F8VZ44;Q9NRG9;Q9NRG9-2;F8VUB6	H3BU82;F8VZ44;Q9NRG9;Q9NRG9-2	23.2306	24.0368	23.9073	23.4316	23.6194	23.5209	23.2399	23.1074	22.8477	23.2476	15.15	102910000	22	2	2	3	2	3	2	2	2	1	3	20.4	38.518
PCBP2;PCBP3	Poly(rC)-binding protein 2;Poly(rC)-binding protein 3	Q15366-5;Q15366-7;Q15366-8;Q15366-4;Q15366-2;Q15366;Q15366-3;Q15366-6;H3BRU6;F8VZX2;P57721-3;P57721-2;P57721-5;E9PFP8;P57721-4;P57721;F8W0G4;J3QT27;F8W1G6;F8VXH9;H3BSS4;F8VRH0;F8VTZ0;C9JTY5;H3BND9;C9J5V4;H3BSP4;C9JSA6;C9K0A2;C9J0A4;F6TJN8;F8WC71;C9JZY3;C9J7A9;C9IZV9;P57723-2;P57723	Q15366-5;Q15366-7;Q15366-8;Q15366-4;Q15366-2;Q15366;Q15366-3;Q15366-6;H3BRU6;F8VZX2;P57721-3;P57721-2;P57721-5;E9PFP8;P57721-4;P57721;F8W0G4;J3QT27;F8W1G6;F8VXH9	22.2814	24.5414	24.2723	24.6008	24.6783	24.6258	25.0102	24.4084	24.5394	24.5981	5.8807	229070000	15	1	3	2	1	2	1	1	1	0	1	25.4	35.346
MYL6	Myosin light polypeptide 6	F8W1R7;G3V1V0;P60660-2;P60660;J3KND3;G8JLA2;B7Z6Z4;G3V1Y7;F8VPF3;F8W1I5;P14649;H0YI43;F8VZU9;F8W180	F8W1R7;G3V1V0;P60660-2;P60660;J3KND3;G8JLA2;B7Z6Z4;G3V1Y7;F8VPF3	27.4439	26.9326	27.6352	27.003	26.9849	26.2743	26.2951	26.8008	25.8482	27.0006	37.349	1212600000	45	5	5	5	5	5	5	4	4	2	4	39.3	16.29
HNRNPA1;HNRNPA1L2	Heterogeneous nuclear ribonucleoprotein A1;Heterogeneous nuclear ribonucleoprotein A1, N-terminally processed;Heterogeneous nuclear ribonucleoprotein A1-like 2	F8W6I7;P09651-3;P09651-2;P09651;F8VTQ5;Q32P51;F8W646;H0YH80;F8VZ49;F8VYN5	F8W6I7;P09651-3;P09651-2;P09651;F8VTQ5;Q32P51	27.6442	27.2521	27.5797	28.0006	27.2438	27.3485	27.9064	28.3473	27.5937	27.8855	49.488	2323600000	68	8	6	7	7	5	4	5	6	4	6	30.3	33.155
FANCI	Fanconi anemia group I protein	F8W7R3;Q9NVI1-2;Q9NVI1-1;Q9NVI1;H3BP78;H3BS60;H3BQE2;H3BT54;H3BMG4;Q9NVI1-4	F8W7R3;Q9NVI1-2;Q9NVI1-1;Q9NVI1;H3BP78	NaN	22.9407	24.809	23.6166	23.3843	23.5498	23.2315	23.6297	23.8153	23.2535	2.9824	120200000	6	0	1	1	1	2	0	0	0	1	0	3	123.24
TIA1	Nucleolysin TIA-1 isoform p40	F8W8I6;P31483;C9JTN7;P31483-2;E5RGV5;P31483-3;E5RG67;H7BY49;F8WE16	F8W8I6;P31483;C9JTN7;P31483-2;E5RGV5;P31483-3;E5RG67	23.6415	24.0905	22.8383	24.0926	23.9755	24.4487	24.4002	24.0573	24.3956	23.952	12.504	158490000	13	2	1	2	1	1	1	1	1	0	1	15.6	42.835
ARPC4-TTLL3;ARPC4	Actin-related protein 2/3 complex subunit 4	H7C0A3;F8WCF6;P59998;P59998-3;R4GN08;F8WDD7;A0A0A6YYG9;P59998-4;P59998-2	H7C0A3;F8WCF6;P59998;P59998-3;R4GN08;F8WDD7;A0A0A6YYG9;P59998-4;P59998-2	NaN	21.6856	22.1878	21.5314	21.7551	21.0953	21.4467	21.8026	21.3577	21.8273	3.0338	31851000	9	1	1	2	1	0	0	0	2	1	1	11.4	19.288
CPSF6	Cleavage and polyadenylation specificity factor subunit 6	F8WJN3;Q16630-3;Q16630;Q16630-2;F8W084	F8WJN3;Q16630-3;Q16630;Q16630-2	24.7608	24.6012	24.8827	24.9662	24.6478	24.7148	24.8231	24.1323	25.0893	24.8572	19.019	258170000	20	2	1	2	3	2	2	2	1	2	3	13.2	52.269
RPL18	60S ribosomal protein L18	G3V203;J3QQ67;Q07020;F8VUA6;H0YHA7;Q07020-2;F8VYV2;A0A075B7A0;F8VXR6	G3V203;J3QQ67;Q07020;F8VUA6;H0YHA7;Q07020-2;F8VYV2;A0A075B7A0	NaN	24.0584	23.9855	24.1352	24.5179	23.4175	24.2081	24.7121	23.7517	24.1582	35.119	189070000	24	1	1	2	2	3	1	3	3	3	3	26.8	18.756
SNW1	SNW domain-containing protein 1	G3V4X8;G3V3A4;Q13573	G3V4X8;G3V3A4;Q13573	NaN	22.8638	23.0165	22.5606	22.8896	22.9362	22.9596	22.3916	22.8915	23.7067	9.4678	70868000	16	1	2	3	1	2	1	1	2	1	2	10.4	43.331
CPSF3	Cleavage and polyadenylation specificity factor subunit 3	G5E9W3;Q9UKF6	G5E9W3;Q9UKF6	22.742	22.6902	23.5551	24.2877	24.4625	24.664	23.9503	23.6536	23.019	23.7031	17.607	146400000	15	1	1	2	3	2	2	1	1	0	2	7.1	73.476
SEC24C	Protein transport protein Sec24C	G5EA31;P53992;P53992-2	G5EA31;P53992;P53992-2	23.8846	24.1953	23.4203	24.4498	23.5793	24.7296	23.7321	23.418	24.0992	23.6905	17.38	156620000	28	5	5	3	3	2	1	1	2	3	3	10.2	111.98
ATAD3A;ATAD3B	ATPase family AAA domain-containing protein 3A;ATPase family AAA domain-containing protein 3B	H0Y2W2;Q9NVI7-3;Q9NVI7-2;Q9NVI7;Q5T9A4-3;Q5T9A4;Q5T9A4-2;Q5T2N8;Q5SV16	H0Y2W2;Q9NVI7-3;Q9NVI7-2;Q9NVI7;Q5T9A4-3;Q5T9A4;Q5T9A4-2	23.7451	24.5127	24.5882	24.6439	24.295	24.4883	24.4569	24.4884	24.3388	24.4168	15.022	245110000	33	1	3	6	4	5	1	3	4	2	4	10.1	64.243
RBM39	RNA-binding protein 39	H0Y4X3;Q14498-3;Q14498-2;Q14498;G3XAC6;Q5QP23;A0A087X122;Q5QP22	H0Y4X3;Q14498-3;Q14498-2;Q14498;G3XAC6	NaN	22.5174	23.2548	22.3018	22.7809	22.9057	21.8805	23.3468	22.5273	23.2867	17.068	77097000	13	1	1	2	1	1	1	0	2	1	2	18.8	36.514
RPS2	40S ribosomal protein S2	H0YEN5;P15880;I3L404;E9PM36;E9PMM9;E9PQD7;E9PPT0	H0YEN5;P15880;I3L404;E9PM36;E9PMM9;E9PQD7	23.727	23.5914	23.3681	24.063	22.6929	NaN	22.7275	23.729	24.2287	22.6584	7.9313	127110000	16	2	2	1	2	0	1	1	2	2	1	14.9	21.154
ATP5B	ATP synthase subunit beta;ATP synthase subunit beta, mitochondrial	H0YH81;P06576;F8W079;F8W0P7;H0YI37	H0YH81;P06576;F8W079	26.3747	26.2664	26.446	25.8101	25.986	25.806	26.2638	25.8746	25.9663	26.1184	36.749	757350000	88	10	10	11	8	8	5	8	10	6	7	41.2	38.138
RPL28	60S ribosomal protein L28	H0YLP6;H0YMF4;H0YKD8;P46779-4;P46779-5;P46779;P46779-2;P46779-3	H0YLP6;H0YMF4;H0YKD8;P46779-4;P46779-5;P46779;P46779-2;P46779-3	22.9028	23.5043	22.8223	21.8974	21.8492	22.0331	22.9505	NaN	23.8593	23.0499	8.5232	83749000	17	2	2	2	1	1	2	0	2	2	2	24.7	9.657
SLTM	SAFB-like transcription modulator	H0YLW7;H0YMW8;H0YNF3;H0YMR6;H0YLE6;H0YL55;H7BXE3;Q9NWH9	H0YLW7;H0YMW8;H0YNF3;H0YMR6;H0YLE6;H0YL55;H7BXE3;Q9NWH9	23.0393	22.8098	22.945	23.5782	23.3483	23.6027	23.441	22.9898	23.8543	23.2661	37.183	90804000	20	2	2	2	1	3	3	2	2	1	2	45.2	6.6127
ANXA2;ANXA2P2	Annexin A2;Annexin;Putative annexin A2-like protein	P07355;H0YN42;H0YMU9;H0YMD0;P07355-2;H0YKS4;H0YMM1;H0YKZ7;H0YMT9;H0YLV6;H0YKX9;A6NMY6;H0YKL9;H0YKV8;H0YMW4;H0YNP5;H0YM50;H0YMD9;H0YNB8;H0YN28;H0YL33;H0YNA0;H0YKN4;H0YN52;H0YLE2	P07355;H0YN42;H0YMU9;H0YMD0;P07355-2;H0YKS4;H0YMM1;H0YKZ7;H0YMT9;H0YLV6;H0YKX9;A6NMY6;H0YKL9;H0YKV8;H0YMW4;H0YNP5;H0YM50	25.312	25.0432	24.6915	25.5257	25.7241	25.9349	25.0155	25.0811	24.8563	24.8545	56.877	432000000	52	3	3	3	5	4	3	3	6	3	6	29.5	38.604
ANP32A;ANP32D;ANP32C	Acidic leucine-rich nuclear phosphoprotein 32 family member A;Acidic leucine-rich nuclear phosphoprotein 32 family member D;Acidic leucine-rich nuclear phosphoprotein 32 family member C	H0YN26;P39687;H7BZ09;O95626;O43423	H0YN26;P39687;H7BZ09;O95626;O43423	22.8269	22.2134	21.9967	21.551	22.3293	NaN	22.4108	22.1765	22.2884	22.1856	1.364	43771000	3	0	0	1	2	0	0	0	0	0	0	9.6	19.997
DDX17	Probable ATP-dependent RNA helicase DDX17	H3BLZ8;Q92841;Q92841-1;Q92841-3;Q92841-2	H3BLZ8;Q92841;Q92841-1;Q92841-3;Q92841-2	27.2126	27.0788	27.4722	27.272	27.0679	26.8271	27.2786	27.1707	26.8794	27.181	110	1456700000	99	11	13	12	6	8	9	9	10	7	11	31.3	80.439
RAB11A;RAB11B	Ras-related protein Rab-11A;Ras-related protein Rab-11B	H3BMH2;H3BSC1;P62491-2;Q15907-2;P62491;Q15907;B4DQU5	H3BMH2;H3BSC1;P62491-2;Q15907-2;P62491;Q15907;B4DQU5	21.9645	NaN	NaN	21.6219	20.9062	NaN	21.8844	24.739	21.8416	21.8829	5.6583	56918000	6	1	1	0	0	0	0	0	3	1	0	21.9	17.668
FUS	RNA-binding protein FUS	H3BPE7;P35637-2;P35637	H3BPE7;P35637-2;P35637	25.5101	24.5809	24.8788	24.7802	24.5878	24.4277	24.757	24.813	24.4029	24.6417	13.842	333150000	16	2	2	2	1	2	0	1	1	1	2	8.2	53.496
HACD3	Very-long-chain (3R)-3-hydroxyacyl-CoA dehydratase 3	H3BPZ1;H3BS72;Q9P035;H3BMZ1;H3BRL8;Q9P035-2	H3BPZ1;H3BS72;Q9P035;H3BMZ1;H3BRL8;Q9P035-2	25.3	24.974	24.882	NaN	23.8972	24.405	24.493	24.2728	25.071	23.9597	39.445	238810000	18	2	2	2	1	2	1	1	3	2	2	6.5	40.069
CIRH1A	Cirhin	H3BSH7;Q969X6-3;Q969X6;H3BPD7;I3L4T9;J3KSI1;Q969X6-2;J3KSE6;J3KTR0;A0A0J9YWK2;A0A0J9YWM9	H3BSH7;Q969X6-3;Q969X6;H3BPD7;I3L4T9;J3KSI1;Q969X6-2	22.8092	22.6361	22.7616	21.2402	22.4056	21.8264	NaN	22.0386	22.9381	22.3013	5.442	53408000	11	1	1	3	1	2	0	0	0	1	2	4.1	77.942
NUP93	Nuclear pore complex protein Nup93	H3BVG0;Q8N1F7;Q8N1F7-2;H3BRI8;H3BP95;H3BM93;H3BVE2;H3BMX0;H3BNN5;H3BV11;H3BRD9;H3BPA9;H3BV15;H3BNG7	H3BVG0;Q8N1F7;Q8N1F7-2	27.5489	27.5352	27.6927	27.1787	27.1726	26.8375	27.3296	27.202	27.0981	27.1886	106.14	1276500000	117	10	11	15	14	17	11	9	10	8	12	25	99.554
NUPL1	Nucleoporin p58/p45	Q5JRG1;H7BYF2;Q9BVL2-2;Q9BVL2-3;Q9BVL2	Q5JRG1;H7BYF2;Q9BVL2-2;Q9BVL2-3;Q9BVL2	NaN	23.1934	23.2809	22.8032	22.8478	22.9453	22.8612	22.4862	22.9037	22.5816	4.9487	65873000	15	1	3	2	3	2	1	0	1	0	2	5.8	49.095
EBNA1BP2	Probable rRNA-processing protein EBP2	H7C2Q8;Q99848	H7C2Q8;Q99848	NaN	23.6812	23.5083	23.2908	23.5878	23.7907	23.097	23.6889	23.5874	23.7491	8.6895	107600000	23	0	2	2	0	3	1	2	5	4	4	15	40.684
MYBBP1A	Myb-binding protein 1A	I3L1L3;Q9BQG0;Q9BQG0-2;I3L311;I3L2H8	I3L1L3;Q9BQG0;Q9BQG0-2	23.697	22.8653	22.5758	NaN	22.9657	23.3483	23.432	23.2204	23.157	22.5379	5.4856	80515000	13	2	2	1	0	1	1	1	1	2	2	3.4	140.13
EIF5A;EIF5AL1	Eukaryotic translation initiation factor 5A;Eukaryotic translation initiation factor 5A-1;Eukaryotic translation initiation factor 5A-1-like	I3L397;I3L504;P63241;P63241-2;Q6IS14;F8WCJ1;C9J7B5;C9J4W5;Q9GZV4	I3L397;I3L504;P63241;P63241-2;Q6IS14	23.3947	23.4367	22.7329	23.1023	23.267	23.4451	23.9516	23.7875	22.5071	23.4216	6.0185	113160000	10	3	1	0	1	0	0	0	2	0	3	30.8	16.019
RPS15A	40S ribosomal protein S15a	P62244;I3L3P7;H3BVC7	P62244;I3L3P7	NaN	22.712	23.2694	22.9004	22.511	22.6145	23.3778	22.7561	22.8988	22.7758	4.6767	78068000	17	1	3	2	3	1	1	3	1	1	1	25.4	14.839
NUP88	Nuclear pore complex protein Nup88	J3KMX1;Q99567;I3L4K7;I3L245	J3KMX1;Q99567	24.7429	25.1491	25.0397	25.4465	25.1125	24.9957	24.9289	24.9746	25.0293	24.929	34.863	326230000	45	3	6	4	5	6	3	3	5	4	6	12.6	78.77
TBL3	Transducin beta-like protein 3	Q12788;J3KNP2;A0A087WYP7	Q12788;J3KNP2;A0A087WYP7	23.8139	23.9555	24.4151	24.0459	23.9032	24.345	24.154	23.5557	24.2718	24.1973	23.671	170420000	31	2	3	3	3	3	3	2	3	4	5	10.8	89.034
DDX5	Probable ATP-dependent RNA helicase DDX5	J3KTA4;P17844-2;P17844;J3KRZ1;J3QSF1;J3QRQ7;J3QR02;J3KRX8;X6RLV5	J3KTA4;P17844-2;P17844	28.7937	28.5762	29.2129	28.4806	28.4907	28.1613	28.4477	28.214	28.2423	28.7662	124.65	3823200000	184	16	15	21	18	19	15	16	21	17	15	33.1	69.086
SRSF1	Serine/arginine-rich splicing factor 1	J3KTL2;Q07955;Q07955-3;Q07955-2;J3KSR8;J3QQV5;J3KSW7	J3KTL2;Q07955;Q07955-3;Q07955-2;J3KSR8	25.8086	26.2482	26.3405	26.4611	26.1858	26.1307	25.5424	26.5958	25.4716	26.1852	27.196	684880000	48	6	6	7	4	3	3	1	7	2	6	30.4	28.329
CHERP	Calcium homeostasis endoplasmic reticulum protein	J3QK89;Q8IWX8	J3QK89;Q8IWX8	24.2166	23.4397	23.9862	23.9802	24.053	24.1057	23.8856	23.8279	23.6568	24.1897	10.484	144610000	22	3	1	3	2	3	2	2	3	1	2	5.9	104.93
MYL12A;MYL12B;MYL9	Myosin regulatory light chain 12A;Myosin regulatory light chain 12B;Myosin regulatory light polypeptide 9	J3QRS3;P19105;O14950;P24844;J3KTJ1;P24844-2	J3QRS3;P19105;O14950;P24844;J3KTJ1;P24844-2	27.3753	27.557	27.8448	27.862	27.4941	27.2496	27.0309	27.5311	27.2482	27.8299	82.476	2009400000	65	5	8	9	6	5	4	4	7	6	10	53.7	20.457
BUB3	Mitotic checkpoint protein BUB3	J3QT28;O43684-2;O43684;J3QSX4	J3QT28;O43684-2;O43684;J3QSX4	24.7902	25.2603	25.2715	25.3806	25.1581	25.2014	25.0802	25.0524	25.579	25.2471	28.809	363590000	28	3	3	3	2	4	2	1	3	3	3	21.6	31.703
LMNB2	Lamin-B2	J9JID7;Q03252	J9JID7;Q03252	30.5797	30.8065	30.7436	30.8174	30.5209	30.7119	30.7265	30.7682	30.9613	30.6832	312.49	17059000000	319	36	37	36	34	24	28	25	35	28	34	59	69.948
RPL22	60S ribosomal protein L22	K7EJT5;K7EP65;K7EKS7;K7ELC4;K7EMH1;K7ERI7;P35268	K7EJT5;K7EP65;K7EKS7;K7ELC4;K7EMH1;K7ERI7;P35268	NaN	24.5711	24.6983	24.3968	24.3282	NaN	24.4699	25.0419	24.9214	24.7945	6.6841	229660000	17	1	2	2	2	2	1	2	1	2	1	51.1	5.0827
U2AF2	Splicing factor U2AF 65 kDa subunit	K7ENG2;P26368-2;P26368	K7ENG2;P26368-2;P26368	23.6733	22.7411	22.9923	22.6946	22.7873	22.8201	23.1553	22.2504	22.5886	23.4233	6.1238	74624000	17	2	1	2	2	1	2	1	1	1	4	25.7	33.901
FBL	rRNA 2-O-methyltransferase fibrillarin	M0QXL5;M0R2Q4;P22087;M0R299;M0R0P1;M0R2U2;M0R1H0;M0R2B0;A0A0D9SFM2;M0QXC9	M0QXL5;M0R2Q4;P22087;M0R299;M0R0P1;M0R2U2;M0R1H0;M0R2B0	25.1781	25.3103	25.3925	25.3647	25.1182	25.0055	25.3039	25.5433	25.2665	25.4414	23.597	412450000	24	3	2	5	3	2	0	1	3	2	3	28.3	26.639
NUP62	Nuclear pore glycoprotein p62	M0QXN5;P37198	M0QXN5;P37198	22.4442	23.4686	23.5898	23.1039	23.6806	23.0545	22.7748	23.0456	23.7082	24.168	6.3655	98121000	13	1	1	0	2	2	1	0	2	2	2	7.2	45.615
RPS5	40S ribosomal protein S5;40S ribosomal protein S5, N-terminally processed	M0R0F0;M0R0R2;P46782;M0QZN2	M0R0F0;M0R0R2;P46782;M0QZN2	24.476	24.6743	24.5632	24.8353	24.9426	25.1792	24.8453	25.2015	25.2534	24.6049	10.759	292330000	26	4	3	2	2	2	3	2	3	2	3	21.5	22.391
RPL18A	60S ribosomal protein L18a	M0R0P7;M0R3D6;M0R1A7;M0R117;Q02543	M0R0P7;M0R3D6;M0R1A7;M0R117;Q02543	24.4158	25.0348	24.4299	23.6909	24.1691	NaN	NaN	24.3381	24.0865	24.189	15.208	183930000	17	2	2	2	1	2	1	1	3	1	2	25.5	16.177
SUPT5H	Transcription elongation factor SPT5	O00267-2;O00267	O00267-2;O00267	23.9287	25.2042	25.6264	25.3022	24.9181	25.8122	25.2766	25.0793	25.0474	26.0655	14.098	347650000	13	1	1	2	2	1	1	0	1	1	3	8.9	120.5
SAP18	Histone deacetylase complex subunit SAP18	X6RAL5;O00422;H7BZW6;U3KPY7;U3KQ12	X6RAL5;O00422;H7BZW6	23.1518	23.3472	22.8336	23.5095	23.1713	23.885	23.525	23.7035	24.0268	23.5	10.052	108910000	21	1	1	0	5	1	2	2	4	2	3	29.7	19.526
NOP56	Nucleolar protein 56	O00567;H0YDU4;H0Y653;Q5JXT2	O00567;H0YDU4;H0Y653;Q5JXT2	26.1063	26.4564	26.3364	26.4295	26.4532	26.2066	26.3228	26.2791	26.7375	26.1709	58.401	791810000	61	7	9	7	4	6	5	2	7	6	8	15	66.049
HNRNPDL	Heterogeneous nuclear ribonucleoprotein D-like	O14979-2;O14979-3;A0A087WU03	O14979-2;O14979-3	27.3894	27.2505	27.8601	27.4865	27.9391	27.3324	27.7015	28.1827	27.3315	27.8431	37.695	2377700000	57	4	6	7	6	5	5	2	7	2	6	25.2	33.588
U2SURP	U2 snRNP-associated SURP motif-containing protein	O15042-2;O15042;E7ET15;O15042-3;H0Y8D9;H7C4V2;E7EW00	O15042-2;O15042;E7ET15;O15042-3	24.1663	24.7097	24.3424	24.5278	24.3611	24.2777	24.3637	24.1898	23.5627	24.1067	39.128	191090000	27	2	2	6	2	2	1	2	4	1	5	8.8	118.23
NKRF	NF-kappa-B-repressing factor	O15226-2;O15226;A0A087WXT2	O15226-2;O15226;A0A087WXT2	22.8299	22.3733	22.8813	23.2309	23.0213	23.2038	22.9912	22.9063	22.8603	23.3784	7.7703	84671000	16	0	1	3	4	1	2	1	2	0	2	8.7	79.495
DHX15	Pre-mRNA-splicing factor ATP-dependent RNA helicase DHX15	O43143	O43143	26.5608	26.5803	26.8312	26.5244	26.3265	26.2482	26.1893	26.2427	26.1035	26.5091	27.926	877380000	78	7	8	10	9	7	8	7	6	7	8	21.5	90.932
PRPF4	U4/U6 small nuclear ribonucleoprotein Prp4	O43172-2;O43172	O43172-2;O43172	NaN	23.0663	22.8369	23.2867	22.7604	23.3589	23.1142	23.3214	23.5092	23.1284	12.319	76326000	13	1	1	3	2	0	0	0	1	2	3	11.9	58.32
PHGDH	D-3-phosphoglycerate dehydrogenase	O43175;Q5SZU1	O43175;Q5SZU1	22.3454	23.1238	23.1217	23.1139	23.2716	22.7897	22.0928	23.9002	22.8135	23.8002	10.516	114000000	19	0	2	3	3	3	0	0	3	0	2	11.4	56.65
SART1	U4/U6.U5 tri-snRNP-associated protein 1	O43290;E9PQI8	O43290	24.3582	24.3028	24.245	25.1245	24.506	24.9807	24.4249	24.8024	25.4789	25.0855	21.136	271410000	22	2	2	5	3	1	2	0	2	1	4	16.8	90.254
HNRNPR	Heterogeneous nuclear ribonucleoprotein R	O43390;O43390-2;O43390-3;O43390-4;B4DT28	O43390;O43390-2;O43390-3;O43390-4;B4DT28	25.964	26.0904	26.0034	26.2182	25.9747	26.0374	26.3265	25.7595	25.8251	26.1401	22.766	674910000	42	4	5	7	5	3	4	3	2	3	6	16.4	70.942
ACTN4	Alpha-actinin-4	O43707-2;O43707;H7C144;F5GXS2;O43707-3;H0YJ11;H0YJW3;H7C5W8;H9KV75;P12814-2;P12814;P12814-3;P12814-4	O43707-2;O43707;H7C144;F5GXS2;O43707-3	21.9194	21.8534	22.0578	21.8699	22.4418	NaN	NaN	23.1729	22.203	22.711	10.001	48792000	11	0	1	1	0	2	0	0	4	0	3	8.2	79.912
NUDT21	Cleavage and polyadenylation specificity factor subunit 5	O43809;H3BND3;H3BV41	O43809;H3BND3	24.1402	23.7517	24.5387	23.6337	23.7687	23.6493	23.7271	23.4278	23.8905	23.7817	10.304	150070000	24	4	2	3	2	2	1	2	5	1	2	30.8	26.227
RRP9	U3 small nucleolar RNA-interacting protein 2	O43818	O43818	23.5372	23.5384	22.8827	23.0349	23.0688	NaN	22.0785	NaN	22.1898	22.3583	5.5675	69579000	15	3	2	2	1	2	1	1	1	1	1	6.1	51.84
AKAP8	A-kinase anchor protein 8	O43823;M0QYL4	O43823	23.9543	23.8487	23.9748	24.114	23.602	24.0434	24.4232	24.1282	23.8447	23.8697	10.167	154390000	20	2	2	2	4	1	0	2	4	1	2	11.1	76.107
RAD21	Double-strand-break repair protein rad21 homolog	O60216;E5RFZ5;E5RI01;E5RG18;E5RFV8;E5RIN7;E5RJW1;E5RJK5	O60216	26.325	26.3163	26.5644	25.716	25.606	25.1112	25.5917	25.4295	25.5614	26.7412	46.153	641980000	51	7	6	7	6	3	3	4	3	3	9	22.8	71.689
SMARCA5	SWI/SNF-related matrix-associated actin-dependent regulator of chromatin subfamily A member 5	O60264;A0A0A0MRP6;B7ZLQ5;P28370-2;P28370	O60264	26.2059	26.275	26.0825	26.2399	26.1833	26.4159	26.6402	26.3974	26.8658	26.371	66.281	805040000	82	6	7	12	10	6	7	7	9	5	13	16.2	121.9
SYNCRIP	Heterogeneous nuclear ribonucleoprotein Q	O60506-2;O60506;O60506-4;O60506-3;B7Z645;O60506-5;F6UXX1	O60506-2;O60506;O60506-4;O60506-3;B7Z645;O60506-5	21.8057	22.4116	22.0949	21.8847	21.7374	22.0384	21.8205	23.1153	21.9336	22.5749	8.799	49325000	11	2	1	1	1	1	1	0	2	0	2	10.7	65.681
DKC1	H/ACA ribonucleoprotein complex subunit 4	O60832;O60832-2;H7C2Q9;H7C2Q2;H7C0M1;C9IYT0	O60832;O60832-2	23.6434	23.8627	23.4493	23.8125	23.5545	23.8587	23.5333	23.643	24.4259	23.2001	14.862	121120000	25	3	3	2	3	2	3	1	3	3	2	7.2	57.673
DNAJA2	DnaJ homolog subfamily A member 2	O60884;A0A087WT48	O60884	23.7441	23.9739	23.8198	23.9051	23.6916	23.9137	24.1431	23.8489	24.361	23.6604	11.017	146380000	31	3	5	4	4	3	4	2	1	2	3	11.2	45.745
ZC3H11A	Zinc finger CCCH domain-containing protein 11A	O75152;E9PQ61;E9PBY7	O75152;E9PQ61	22.7563	NaN	22.4895	22.9958	22.872	22.7129	22.7399	22.7698	22.8884	22.981	7.9646	57441000	14	1	0	0	3	2	1	1	2	1	3	8.1	89.13
GGCT	Gamma-glutamylcyclotransferase	O75223;M0QZK8;H7BZK5;B8ZZK2;O75223-3;O75223-2;O75223-4	O75223;M0QZK8;H7BZK5;B8ZZK2;O75223-3	24.2965	22.6749	NaN	23.8386	24.2646	24.2004	24.1533	22.51	23.0384	23.8983	14.324	134970000	23	3	2	0	2	2	2	2	1	2	3	22.9	21.007
H2AFY	Core histone macro-H2A.1	O75367-2;O75367-3;O75367;B4DJC3;D6RCF2	O75367-2;O75367-3;O75367	25.7465	25.7847	25.1736	25.5301	25.3968	25.4483	25.8879	25.5296	26.2517	25.4303	53.03	483320000	34	3	4	1	4	4	1	3	4	6	4	24.1	39.183
SEC22B	Vesicle-trafficking protein SEC22b	O75396;A0A087X1A9	O75396	24.8008	24.9999	24.8426	25.3989	24.6845	25.5298	25.2533	25.2346	25.4445	25.0716	29.756	358620000	31	4	2	2	3	1	2	3	4	4	5	28.8	24.593
SF3B1	Splicing factor 3B subunit 1	O75533;H7C341;B4DGZ4;O75533-2	O75533	27.1169	27.158	27.3375	27.5948	27.1302	27.2801	26.9854	26.6859	27.046	26.7443	73.243	1328600000	102	9	10	13	13	8	8	7	11	8	15	16.3	145.83
SNRNP200	U5 small nuclear ribonucleoprotein 200 kDa helicase	O75643;O75643-2;B4E0P5	O75643	26.7864	27.1727	27.033	26.8504	26.7273	26.5381	26.5958	26.6101	26.7338	27.1675	123.2	1135900000	140	13	14	18	14	16	11	10	15	11	18	15.9	244.5
NUP155	Nuclear pore complex protein Nup155	O75694;O75694-2;E9PF10	O75694;O75694-2;E9PF10	26.9587	27.0112	26.7858	26.7528	26.7943	26.6179	27.0156	26.4496	26.9811	26.7834	93.612	1153700000	87	8	11	11	10	9	8	8	6	7	9	14.2	155.2
IDH1	Isocitrate dehydrogenase [NADP] cytoplasmic	O75874;C9J4N6	O75874;C9J4N6	22.2029	NaN	22.2967	21.7639	22.1303	NaN	23.2066	22.8899	22.0685	21.917	3.271	52231000	14	1	1	2	1	2	1	1	1	0	1	5.8	46.659
ATP5L	ATP synthase subunit g, mitochondrial	O75964;E9PN17	O75964;E9PN17	NaN	24.5344	24.6158	24.1206	24.4154	24.881	24.5713	24.3499	24.7822	23.9051	11.326	193560000	19	0	2	2	2	2	2	2	2	1	3	30.1	11.428
RSL1D1	Ribosomal L1 domain-containing protein 1	O76021;J3QSV6;I3L3U9;O76021-2;I3L234;I3L3C4;J3KPU7;I3L2F2;I3L4T8;I3L1Y4	O76021;J3QSV6	25.1031	24.8713	24.9544	25.1133	24.5603	24.5966	24.7505	24.9706	25.0176	24.9809	24.872	289260000	30	5	3	4	2	3	2	2	2	3	4	20.2	54.972
PRPF6	Pre-mRNA-processing factor 6	O94906;O94906-2	O94906;O94906-2	24.6336	24.6457	25.0832	24.9736	24.6844	24.3173	24.6783	24.6541	25.0366	24.7697	26.411	282120000	38	4	7	6	6	4	1	2	4	1	3	15	106.92
KIF4A	Chromosome-associated kinesin KIF4A	O95239;O95239-2;Q2VIQ3	O95239;O95239-2	25.2028	25.1361	25.3185	25.5063	25.3576	25.3667	25.2646	24.9865	25.7345	25.9039	50.932	407930000	74	8	3	10	8	7	4	6	7	6	15	21.3	139.88
LDHA	L-lactate dehydrogenase A chain	P00338-3;P00338;P00338-4;P00338-2;P00338-5;F5GYU2;F5GXY2;F5GXH2;F5H155;F5H245;G3XAP5;A0A087WUM2;F5GXC7;F5H5G7;F5H8H6;F5H6W8;F5GZQ4;F5GXU1;F5GWW2;P07864;Q6ZMR3;F5H5J4	P00338-3;P00338;P00338-4;P00338-2;P00338-5	NaN	23.2598	NaN	23.2345	22.7726	22.7663	22.7143	23.6039	23.1639	23.6761	10.229	86643000	13	1	2	0	2	0	0	0	2	2	3	16.9	39.837
A2M	Alpha-2-macroglobulin	P01023;F8W7L3	P01023	26.2834	26.1594	25.0241	25.1766	24.4818	25.1039	25.2957	24.1917	25.3061	24.1053	41.215	381530000	47	5	3	6	6	4	4	6	2	5	2	11.5	163.29
C3	Complement C3;Complement C3 beta chain;C3-beta-c;Complement C3 alpha chain;C3a anaphylatoxin;Acylation stimulating protein;Complement C3b alpha chain;Complement C3c alpha chain fragment 1;Complement C3dg fragment;Complement C3g fragment;Complement C3d fragment;Complement C3f fragment;Complement C3c alpha chain fragment 2	P01024;M0QXZ3	P01024	24.4574	22.1076	24.4207	21.6439	23.0572	21.387	21.4346	21.7126	21.9652	21.6107	47.359	103640000	22	5	1	6	1	2	0	1	1	0	1	8.1	187.15
CSTA	Cystatin-A;Cystatin-A, N-terminally processed	P01040;C9J0E4	P01040;C9J0E4	24.9074	23.0138	23.3209	23.4312	24.0246	24.0349	23.8781	23.2529	22.7418	23.7676	8.2932	173730000	26	3	1	1	1	2	2	1	2	2	3	50	11.006
IGHA1	Ig alpha-1 chain C region	P01876;A0A0G2JMB2;P01877	P01876	23.8761	22.3172	22.9814	22.7162	22.9629	23.6458	23.0988	NaN	22.934	22.4895	7.3798	77114000	11	3	1	3	1	0	1	0	1	0	1	11.6	37.654
LMNA	Prelamin-A/C;Lamin-A/C	P02545-2;P02545-6;P02545;Q3BDU5;P02545-3;Q5TCI8;P02545-5;P02545-4;H0YAB0;A0A0C4DGC5	P02545-2;P02545-6;P02545;Q3BDU5;P02545-3;Q5TCI8;P02545-5;P02545-4	24.0138	23.9359	24.2128	24.0364	24.2235	24.083	24.2994	24.5465	24.1831	24.0937	16.293	199650000	38	3	2	4	3	4	4	4	7	3	4	18	65.134
APOA1	Apolipoprotein A-I;Proapolipoprotein A-I;Truncated apolipoprotein A-I	P02647;F8W696	P02647;F8W696	25.588	24.8044	25.4526	24.4621	24.7778	24.5857	25.0247	24.3011	24.434	24.2156	46.767	328960000	40	7	3	8	5	2	1	3	3	1	1	35.2	30.777
FGA	Fibrinogen alpha chain;Fibrinopeptide A;Fibrinogen alpha chain	P02671-2;P02671;A0A087WUA0;CON__P02672	P02671-2;P02671	26.4625	26.0013	25.4959	26.3314	25.8695	26.2261	26.3185	24.976	25.9589	25.1191	26.729	675370000	76	8	11	7	8	7	6	5	6	5	5	19.9	69.756
FGB	Fibrinogen beta chain;Fibrinopeptide B;Fibrinogen beta chain	P02675;D6REL8;CON__P02676	P02675;D6REL8	27.5928	26.5642	26.4633	26.6891	26.0693	26.6071	26.6665	25.5824	26.4264	25.5839	59.995	915680000	40	5	3	3	4	4	6	6	2	2	2	19.3	55.928
TF	Serotransferrin	P02787;H7C5E8	P02787	24.1781	23.829	23.9785	23.5607	23.3475	23.3839	23.931	22.7989	23.4773	22.9994	10.405	136030000	19	2	2	3	2	1	2	0	2	0	1	5.9	77.063
CAT	Catalase	P04040	P04040	24.4058	23.1892	22.9142	24.5309	24.6389	25.2282	24.5971	23.3966	23.6104	24.0293	19.261	220930000	34	2	1	0	3	4	5	5	2	0	3	17.1	59.755
GAPDH	Glyceraldehyde-3-phosphate dehydrogenase	P04406;P04406-2;E7EUT5;O14556	P04406;P04406-2;E7EUT5	28.197	27.9576	28.0468	28.1993	27.9637	28.1546	28.2754	28.0087	28.3367	28.3062	141.39	2980700000	87	7	8	9	6	8	8	8	5	7	8	41.8	36.053
TP53	Cellular tumor antigen p53	P04637;P04637-4;P04637-3;P04637-2;P04637-6;P04637-5;P04637-7;A0A087WZU8;A0A087X1Q1;J3KP33;E7ESS1;E7EQX7;P04637-9;A0A087WT22;A0A087WXZ1;P04637-8;E7EMR6;E9PFT5	P04637;P04637-4;P04637-3;P04637-2;P04637-6;P04637-5;P04637-7;A0A087WZU8;A0A087X1Q1;J3KP33;E7ESS1;E7EQX7;P04637-9;A0A087WT22;A0A087WXZ1;P04637-8	24.4975	24.67	24.0345	24.6998	24.0143	24.911	24.4938	NaN	24.3813	23.9871	8.3058	187740000	18	2	2	1	1	2	2	2	2	2	2	10.4	43.653
RPN1	Dolichyl-diphosphooligosaccharide--protein glycosyltransferase subunit 1	P04843;B7Z4L4;F8WF32	P04843;B7Z4L4	26.3154	26.478	26.6213	25.9988	26.2887	25.5392	26.1945	26.44	26.2369	26.2413	66.569	746820000	60	6	8	8	5	7	4	6	7	5	4	19.3	68.569
RPN2	Dolichyl-diphosphooligosaccharide--protein glycosyltransferase subunit 2	P04844-2;P04844;Q5JYR3;Q5JYR4;Q5JYR7	P04844-2;P04844	25.5358	25.6577	25.4487	24.5881	25.3106	24.9395	25.3017	24.9512	25.6077	25.218	23.186	373070000	29	4	4	3	3	3	2	2	3	3	2	13	67.723
SLC25A5	ADP/ATP translocase 2;ADP/ATP translocase 2, N-terminally processed	P05141;Q9H0C2	P05141	26.4264	26.4455	26.7598	26.3326	26.3138	25.8304	26.7767	26.3026	26.3775	25.9979	15.655	847420000	40	4	4	6	5	3	2	3	6	3	3	33.2	32.852
RPLP2	60S acidic ribosomal protein P2	P05387;H0YDD8	P05387;H0YDD8	23.7706	23.935	24.115	23.4376	22.8822	22.8212	23.2103	23.9641	23.409	23.914	9.4186	128390000	15	1	3	2	2	2	0	0	2	1	2	57.4	11.665
RPLP0;RPLP0P6	60S acidic ribosomal protein P0;60S acidic ribosomal protein P0-like	P05388;F8VU65;F8VWS0;P05388-2;F8VPE8;G3V210;F8VW21;Q8NHW5;F8VQY6;F8VRK7;F8VS58;F8VZS0;F8VWV4;F8W1K8	P05388;F8VU65;F8VWS0;P05388-2;F8VPE8;G3V210;F8VW21;Q8NHW5;F8VQY6;F8VRK7;F8VS58;F8VZS0	24.6066	25.0362	25.1263	24.7632	24.816	24.0746	24.7488	24.8951	24.3558	24.9403	22.252	275270000	32	3	5	4	3	2	2	2	3	2	5	36.3	34.273
RB1	Retinoblastoma-associated protein	P06400	P06400	23.2418	22.4973	22.7625	22.4269	22.3214	22.9682	23.5709	22.3746	22.739	22.3757	5.054	69668000	15	2	2	2	0	1	1	2	1	1	3	4.8	106.16
ENO1	Alpha-enolase;Enolase	P06733;K7EM90;P06733-2;E5RI09;E5RG95;K7EPM1;K7EKN2;E5RGZ4;P13929-3;P13929-2;P13929	P06733;K7EM90	24.0866	23.9077	24.0508	23.8625	24.1507	24.1905	24.1093	24.9356	25.1024	25.2535	23.214	260460000	43	5	5	4	4	3	1	3	7	2	4	25.8	47.168
NPM1	Nucleophosmin	P06748-3;P06748-2;P06748;E5RGW4;E5RI98	P06748-3;P06748-2;P06748	26.6161	26.6472	26.4853	26.8242	26.4308	26.7115	26.413	27.7808	26.5823	26.6955	41.611	1067000000	32	2	2	2	4	2	2	2	8	1	7	47.1	28.4
LDHB	L-lactate dehydrogenase B chain;L-lactate dehydrogenase	P07195;A8MW50;F5H793;C9J7H8	P07195;A8MW50	NaN	24.1472	NaN	23.1012	23.3318	22.7534	22.569	25.7539	23.4171	25.741	26.597	230600000	24	0	2	0	1	3	1	1	4	1	7	21.6	36.638
CTSD	Cathepsin D;Cathepsin D light chain;Cathepsin D heavy chain	P07339;H7C469;H7C1V0;F8WD96;C9JH19;F8W787	P07339;H7C469;H7C1V0;F8WD96;C9JH19	23.7107	23.4012	23.1712	24.5917	24.4502	24.5621	23.5943	23.0522	23.538	22.9111	5.3768	156690000	17	2	2	0	4	4	2	1	1	0	0	10.9	44.552
TUBB	Tubulin beta chain	P07437;Q5JP53;Q5ST81	P07437;Q5JP53;Q5ST81	27.3746	27.4939	27.2889	27.3831	27.2669	27.2904	27.1498	27.7941	27.3043	27.6575	91.706	2233000000	124	12	15	14	10	9	10	7	10	10	15	30.9	49.67
PFN1	Profilin-1	P07737;K7EJ44;I3L3D5;CON__P02584	P07737;K7EJ44;I3L3D5	22.796	23.8745	22.101	23.0185	23.5144	22.9696	22.928	24.0296	23.8583	24.9359	12.72	169830000	15	1	2	0	0	2	0	0	1	1	4	38.6	15.054
HSP90AA1	Heat shock protein HSP 90-alpha	P07900;P07900-2;G3V2J8;Q58FF8;Q14568;Q58FF6;Q58FG0	P07900;P07900-2	24.1417	25.8742	24.923	25.1364	25.1637	24.6065	24.6782	27.5486	24.5273	26.1052	50.416	612540000	41	1	3	4	3	4	2	2	9	1	6	21.7	84.659
HSP90AB1	Heat shock protein HSP 90-beta	P08238;Q58FF7;F8W026	P08238	26.4926	27.295	26.9477	26.9547	27.2264	26.5474	26.6733	28.8502	26.7666	27.7323	144.78	1981300000	103	9	12	10	6	6	5	7	18	5	11	24.2	83.263
SNRPB2	U2 small nuclear ribonucleoprotein B	P08579	P08579	22.9228	23.3313	22.6529	23.5014	23.3173	23.7467	23.5111	22.7874	23.722	23.0811	6.3633	86103000	17	1	1	2	2	1	1	2	2	3	2	19.6	25.486
VIM	Vimentin	P08670;B0YJC4;B0YJC5;Q5JVS8;A0A087WYG8;E7EMV2;E7ESP9;Q16352;P07197-2;P07196;P07197	P08670;B0YJC4	23.4579	24.172	23.8325	24.7851	24.6712	24.126	22.698	28.9152	25.1979	25.4138	125.68	864810000	49	2	1	1	4	3	2	0	20	3	7	38.4	53.651
SNRPA1	U2 small nuclear ribonucleoprotein A	P09661;H0YLR3;H0YMA0;H0YKK0	P09661;H0YLR3;H0YMA0	24.837	24.9362	25.3062	24.9266	24.833	24.4493	24.6779	24.7612	24.5782	25.2415	30.502	303190000	31	5	3	3	3	3	3	2	2	3	4	29	28.415
PARP1	Poly [ADP-ribose] polymerase 1	P09874;Q5VX84;Q5VX85	P09874	27.3531	27.4661	27.3507	27.4757	27.4438	27.4413	27.6018	27.6178	27.7825	27.6167	70.845	1844700000	122	12	15	15	13	9	7	8	13	12	15	25.5	113.08
HIST1H2AJ;HIST1H2AH;H2AFJ;HIST2H2AC;HIST2H2AA3;HIST1H2AG	Histone H2A type 1-J;Histone H2A type 1-H;Histone H2A.J;Histone H2A type 2-C;Histone H2A type 2-A;Histone H2A type 1;Histone H2A	Q99878;Q96KK5;Q9BTM1;Q16777;Q6FI13;P0C0S8;Q9BTM1-2;H0YFX9	Q99878;Q96KK5;Q9BTM1;Q16777;Q6FI13;P0C0S8;Q9BTM1-2;H0YFX9	31.0773	30.843	31.1468	30.4751	30.8727	30.3124	30.6264	30.1571	31.1406	30.919	80.137	16876000000	97	7	10	11	9	10	8	9	11	9	9	41.4	13.936
TXN	Thioredoxin	P10599-2;P10599	P10599-2;P10599	23.6778	NaN	NaN	23.7246	23.943	23.8277	23.2815	NaN	23.1471	23.2946	8.4347	143020000	18	2	1	0	2	2	2	2	1	1	2	25.9	9.4519
HSPD1	60 kDa heat shock protein, mitochondrial	P10809;E7ESH4;E7EXB4;P10809-2;C9JL25	P10809	25.2269	25.4104	25.0611	25.0458	25.3154	25.8187	25.6278	26.6214	26.0859	25.41	63.26	514250000	77	7	10	6	6	6	6	6	12	6	6	26.7	61.054
CLU	Clusterin;Clusterin beta chain;Clusterin alpha chain;Clusterin	P10909-4;P10909;P10909-5;P10909-2;P10909-3;H0YAS8;H0YC35;E7ERK6;E7ETB4;H0YLK8;E5RG36;E5RGB0;E5RH61;E5RJZ5	P10909-4;P10909;P10909-5;P10909-2;P10909-3;H0YAS8;H0YC35	25.2965	25.3474	25.0139	23.8432	23.8612	24.0627	23.8934	25.4651	23.3873	23.6411	13.497	264870000	12	0	0	1	1	0	0	0	6	1	1	22.6	48.803
HSPA5	78 kDa glucose-regulated protein	P11021	P11021	24.367	24.5546	24.8212	24.5757	24.8079	24.7088	24.6351	25.3957	24.8488	24.8837	39.106	293580000	54	5	6	4	3	5	4	5	7	5	6	20.9	72.332
HSPA8	Heat shock cognate 71 kDa protein	P11142;E9PKE3;P11142-2;E9PN89;E9PNE6;E9PLF4;A8K7Q2;P54652;E9PI65;E9PQQ4;E9PQK7;E9PK54;E9PPY6;E9PS65;E9PN25;E9PM13	P11142;E9PKE3;P11142-2;E9PN89;E9PNE6	27.0035	26.75	27.1254	26.5665	26.6865	26.3546	26.6657	26.7535	26.5495	26.6755	67.965	1250100000	120	9	12	16	13	12	8	9	13	6	10	28.9	70.897
TOP1	DNA topoisomerase 1	P11387;H0YAR3;Q969P6-2;Q969P6	P11387	24.8711	25.172	24.8328	25.1853	24.7948	25.0153	25.1568	24.8654	25.0564	24.822	14.851	309660000	31	2	4	4	5	2	2	3	2	2	5	10.6	90.725
TOP2A	DNA topoisomerase 2-alpha	P11388;P11388-2;P11388-3;P11388-4;J3KTB7	P11388;P11388-2;P11388-3;P11388-4	27.5644	27.3689	27.5079	27.4432	27.4963	27.4236	27.6174	27.524	27.7836	27.4592	109.2	1883900000	182	19	21	28	21	16	11	14	17	13	22	25.3	174.38
TPR	Nucleoprotein TPR	P12270;P12270-2;Q5SWX9	P12270;P12270-2	24.7742	25.1454	25.0316	25.0573	24.9832	24.9061	24.6995	25.0726	25.0338	24.7555	44.9	338230000	67	6	9	5	7	6	6	5	8	5	10	6.9	267.29
CKB	Creatine kinase B-type	P12277;G3V4N7;G3V461;H0YJG0	P12277;G3V4N7	NaN	21.9498	NaN	21.1875	21.2977	NaN	NaN	24.4939	21.1631	23.671	17.209	95014000	11	0	2	0	0	0	0	0	3	0	2	19.2	42.644
XRCC6	X-ray repair cross-complementing protein 6	P12956;P12956-2;B1AHC9	P12956;P12956-2;B1AHC9	23.8633	23.866	24.3742	23.9497	24.1776	23.4721	23.7725	24.6983	23.6589	24.1758	14.386	193990000	33	4	3	5	4	4	1	1	5	1	4	13.1	69.842
XRCC5	X-ray repair cross-complementing protein 5	P13010	P13010	23.2968	23.314	23.3703	23.5404	23.5339	23.4768	23.1484	23.976	23.629	23.6594	8.8542	116470000	27	5	3	2	2	3	2	1	4	2	3	7.2	82.704
EEF2	Elongation factor 2	P13639	P13639	26.2762	25.8582	25.6954	25.7447	25.7739	25.8866	25.7993	26.1785	25.9432	25.9409	50.269	643430000	83	10	8	9	6	8	4	6	9	7	8	18.1	95.337
PKM	Pyruvate kinase PKM;Pyruvate kinase	P14618;B4DNK4;H3BTN5;P14618-2;P14618-3;H3BQ34;H3BT25;H3BUW1;H3BTJ2;H3BR70;H3BU13;H3BN34;H3BQZ3;P30613-2;P30613	P14618;B4DNK4;H3BTN5;P14618-2;P14618-3;H3BQ34	25.2173	25.3554	25.0707	25.4567	25.3751	25.0907	25.0948	26.2374	25.057	25.7873	34.735	552060000	48	3	5	2	6	2	2	3	7	4	7	25.2	57.936
HNRNPL	Heterogeneous nuclear ribonucleoprotein L	P14866;M0QXS5;P14866-2;M0QYT0;B4DVF8;M0R1W6;M0R076;M0QYL7;H7C464	P14866;M0QXS5;P14866-2	29.5353	29.3938	29.8215	29.5762	29.2411	29.2472	29.161	28.9928	28.9491	29.4809	155.4	6447800000	110	13	10	13	11	12	8	9	12	7	14	35.7	64.132
JUP	Junction plakoglobin	P14923;C9JTX4;C9J826;C9JK18;C9JKY1	P14923;C9JTX4;C9J826;C9JK18;C9JKY1	25.6341	24.8783	25.9139	25.8374	26.1456	27.0536	26.2287	25.101	25.4281	25.8751	35.263	763410000	75	7	3	4	7	7	7	7	5	3	7	17.2	81.744
DSP	Desmoplakin	P15924;P15924-3;P15924-2	P15924;P15924-3;P15924-2	27.5436	26.4162	27.1062	27.7917	27.8223	28.6994	27.7287	26.7709	26.923	27.023	178.34	2340700000	238	25	11	15	27	25	27	14	10	11	21	13.7	331.77
HIST1H1B	Histone H1.5	P16401	P16401	30.0192	29.7111	29.1722	29.3285	29.207	29.3578	29.5935	28.9745	29.8564	29.2857	40.199	6892600000	74	9	9	7	7	6	5	7	7	6	9	26.1	22.58
HIST1H1C	Histone H1.2	P16403	P16403	30.776	30.958	30.7843	30.6716	30.4572	30.7965	30.883	30.7664	31.0711	30.5802	78.442	17642000000	129	13	14	15	13	9	11	9	16	8	14	35.7	21.364
ATP2A2;ATP2A3;ATP2A1	Sarcoplasmic/endoplasmic reticulum calcium ATPase 2;Sarcoplasmic/endoplasmic reticulum calcium ATPase 3;Sarcoplasmic/endoplasmic reticulum calcium ATPase 1	P16615-2;P16615-5;P16615-3;P16615;Q93084-5;Q93084-3;O14983;Q93084-6;Q93084;Q93084-7;P16615-4;H7C5W9;Q93084-2;O14983-3;Q93084-4;O14983-2;H3BTW4	P16615-2;P16615-5;P16615-3;P16615;Q93084-5;Q93084-3;O14983;Q93084-6;Q93084;Q93084-7;P16615-4;H7C5W9;Q93084-2;O14983-3;Q93084-4;O14983-2	22.2559	23.0471	23.3332	22.3749	22.6226	22.2388	22.4361	22.5322	22.7339	22.5475	5.5269	65565000	8	1	1	2	1	1	0	0	1	1	0	4.6	109.69
TCP1	T-complex protein 1 subunit alpha	P17987;E7ERF2;F5H282;E7EQR6;F5H136;F5H7Y1;F5GYL4;F5GZI8;F5GZ03;F5H726;F5H676	P17987;E7ERF2;F5H282;E7EQR6	24.2141	23.9513	24.7381	23.967	23.9092	23.4793	23.7427	24.0933	23.8237	24.7784	12.855	203730000	22	2	4	2	3	2	0	0	4	0	4	16.4	60.343
RPL7	60S ribosomal protein L7	P18124;A8MUD9	P18124;A8MUD9	24.4256	24.3894	24.2268	24.0977	24.2018	24.0914	24.4159	25.0871	24.7221	24.4273	21.397	231120000	22	2	3	2	2	2	2	1	3	2	2	11.7	29.225
NCL	Nucleolin	P19338;H7BY16	P19338;H7BY16	25.7829	25.7284	25.6092	25.2505	25.5096	25.9829	25.8009	25.8442	25.9839	25.4904	39.303	518560000	46	7	7	3	2	5	3	4	8	3	3	15.4	76.613
LMNB1	Lamin-B1	P20700;E9PBF6;A0A0D9SFE5;A0A0D9SFY5	P20700;E9PBF6;A0A0D9SFE5	33.5296	33.8364	33.9174	33.6475	33.4562	33.5627	33.7018	33.559	33.4912	33.5364	323.31	126380000000	819	72	89	95	80	80	66	72	88	69	85	70.5	66.408
FLNA	Filamin-A	Q5HY54;P21333-2;P21333;Q60FE5;A0A087WWY3;F8WE98;Q14315-2;Q14315;H0Y5C6;H0Y5F3;H7C2E7	Q5HY54;P21333-2;P21333;Q60FE5;A0A087WWY3	29.1432	29.124	29.3874	29.3126	29.1516	28.9414	28.9353	28.9785	29.1669	29.3131	323.31	5773000000	383	38	45	44	38	41	29	26	40	27	45	31.5	276.55
VDAC1	Voltage-dependent anion-selective channel protein 1	P21796;C9JI87	P21796;C9JI87	26.1077	26.5158	26.362	26.1528	26.312	26.327	26.3861	25.9953	26.4364	26.1039	29.564	748670000	51	6	6	6	6	5	5	4	4	3	5	32.9	30.772
UBA1	Ubiquitin-like modifier-activating enzyme 1	P22314-2;P22314;Q5JRR6;Q5JRS1;Q5JRS3;Q5JRS2;Q5JRR9;Q5JRS0	P22314-2;P22314	NaN	22.6003	21.6601	21.6733	21.4614	21.4639	21.5789	25.6524	21.7374	24.4991	29.627	118250000	18	0	0	0	1	0	0	0	7	0	6	12.8	113.8
HNRNPA2B1	Heterogeneous nuclear ribonucleoproteins A2/B1	P22626;P22626-2;A0A087WUI2	P22626;P22626-2;A0A087WUI2	30.4923	30.1317	30.3456	30.3737	30.1571	30.2541	30.5944	30.4191	30.0956	30.2317	222.58	14889000000	237	25	18	21	21	17	18	17	24	19	22	59.5	37.429
SFPQ	Splicing factor, proline- and glutamine-rich	P23246;P23246-2;H0Y9K7;H0Y9U2	P23246;P23246-2	27.0739	26.7948	26.939	27.3359	26.759	27.0425	27.046	26.9125	27.0005	26.9404	65.755	1334400000	101	9	11	16	13	11	8	6	12	6	8	23.5	76.149
RPS3	40S ribosomal protein S3	P23396;P23396-2;H0YEU2;E9PL09;F2Z2S8;H0YF32;H0YCJ7;E9PPU1;E9PQ96;E9PJH4;E9PK82;H0YES8;E9PJN9;E9PQX2;E9PSF4	P23396;P23396-2;H0YEU2;E9PL09;F2Z2S8;H0YF32;H0YCJ7;E9PPU1	24.7996	24.9436	24.7126	24.6727	24.5721	24.5176	24.6017	24.015	24.724	24.2027	43.712	278760000	34	4	4	6	4	3	3	1	2	2	4	31.3	26.688
CFL1	Cofilin-1	P23528;E9PP50;E9PK25;E9PS23;G3V1A4;E9PLJ3;E9PQB7;Q9Y281;F8WDN3;Q9Y281-3	P23528;E9PP50;E9PK25;E9PS23;G3V1A4	24.4934	24.318	24.4083	24.6604	24.4264	24.6987	24.4057	24.4727	24.7332	24.2471	8.7983	232310000	16	3	2	2	1	1	1	1	1	1	1	39.2	18.502
MCM3	DNA replication licensing factor MCM3	P25205;P25205-2;J3KQ69	P25205;P25205-2;J3KQ69	25.6734	26.0597	25.9792	25.8623	25.5316	25.628	25.5606	25.9541	26.0789	26.4391	34.563	542600000	68	9	10	9	9	6	4	2	5	5	9	21.9	90.98
RPS12	40S ribosomal protein S12	P25398	P25398	23.5614	22.8764	24.1086	23.2804	22.8535	23.0906	22.8241	NaN	23.9115	23.1624	20.852	92347000	15	2	2	2	1	1	1	0	2	2	1	30.3	14.515
ATP5A1	ATP synthase subunit alpha, mitochondrial	P25705;P25705-2;P25705-3;K7EK77;K7ERX7;K7ENJ4;K7EQH4;K7EJP1;K7ESA0	P25705;P25705-2;P25705-3;K7EK77;K7ERX7;K7ENJ4	27.0324	27.0331	27.0185	26.7482	26.8515	26.7895	26.9261	27.023	27.23	26.7119	121.47	1236400000	93	12	10	8	8	10	5	9	9	9	10	24.1	59.75
RPL13	60S ribosomal protein L13	P26373;J3QSB4;P26373-2	P26373;J3QSB4;P26373-2	23.8034	23.3703	23.151	23.4496	23.2904	23.511	23.5026	25.061	24.1012	23.5736	53.523	164370000	22	3	2	2	1	2	1	1	4	2	2	24.2	24.261
PTBP1	Polypyrimidine tract-binding protein 1	P26599;P26599-2;P26599-3;A0A0D9SF20;A6NLN1;A0A087WU68;K7EKJ7;K7EK45;O95758-7;O95758-1;O95758-6;O95758-2;O95758;O95758-5;O95758-4	P26599;P26599-2;P26599-3;A0A0D9SF20;A6NLN1	24.5078	23.8776	24.2426	23.6277	24.1425	24.0178	24.2689	23.4765	24.2929	23.9844	11.312	178040000	26	3	2	3	2	4	1	2	2	2	5	9	57.221
ABCD3	ATP-binding cassette sub-family D member 3	P28288;P28288-2;P28288-3	P28288;P28288-2	23.9165	24.3991	24.4489	24.0094	24.1786	23.7142	24.5122	24.3761	24.7089	24.4312	17.514	186790000	27	2	3	4	3	2	2	2	3	2	4	9.3	75.475
RPL12	60S ribosomal protein L12	P30050;P30050-2	P30050;P30050-2	25.7392	25.5785	25.46	25.4195	25.3624	25.5835	25.7669	25.231	25.5899	25.4518	41.186	441760000	29	3	3	2	2	3	2	3	3	3	4	28.5	17.818
HNRNPH3	Heterogeneous nuclear ribonucleoprotein H3	P31942-2;P31942;P31942-3;P31942-4;P31942-6;P31942-5	P31942-2;P31942;P31942-3;P31942-4	28.2997	28.1273	28.1922	27.5992	27.8262	27.9106	28.1887	27.926	27.847	27.9282	77.294	2895200000	87	7	8	7	8	7	7	7	8	6	9	31.4	35.238
CASP14	Caspase-14;Caspase-14 subunit p17, mature form;Caspase-14 subunit p10, mature form;Caspase-14 subunit p20, intermediate form;Caspase-14 subunit p8, intermediate form	P31944	P31944	24.655	24.0189	23.3992	24.5978	24.8411	25.2876	24.2075	23.5267	23.7197	24.4852	16.475	246640000	27	3	4	2	3	3	3	1	1	1	2	17.4	27.679
PRDX2	Peroxiredoxin-2	P32119;A6NIW5;P32119-2	P32119	25.7014	25.6907	25.378	25.8953	25.9519	26.2685	25.8596	25.525	26.3122	25.7051	8.9249	573200000	32	3	4	3	3	3	3	3	3	3	3	22.7	21.892
MCM4	DNA replication licensing factor MCM4	P33991;E5RG31;Q9UJA3-2;Q9UJA3-3;Q9UJA3;Q9UJA3-4	P33991	23.8888	23.9543	24.5862	23.6967	24.2616	23.6222	24.4373	23.9398	24.2074	24.6823	13.782	187340000	28	3	1	5	2	2	1	3	3	3	5	10.1	96.557
MCM5	DNA replication licensing factor MCM5;DNA helicase	P33992;B1AHB1;B1AHB2;B1AHA9	P33992;B1AHB1	24.0356	23.1758	24.5119	24.2483	24.3328	24.5572	24.5019	24.5667	25.0171	24.6423	16.752	216710000	40	4	4	7	4	5	1	3	5	3	4	11.6	82.285
MCM7	DNA replication licensing factor MCM7	P33993;P33993-3;P33993-2	P33993;P33993-3	23.9036	23.9979	24.1228	24.0816	24.0947	23.0511	23.9455	23.3668	23.7989	23.9037	21.951	152020000	27	3	6	6	3	2	1	1	3	1	1	14	81.307
PHB	Prohibitin	P35232;C9JW96;C9JZ20;E7ESE2;E9PCW0;P35232-2;D6RBK0	P35232;C9JW96;C9JZ20;E7ESE2;E9PCW0	26.7447	26.7329	27.0413	26.3689	26.3654	26.2255	26.0878	26.8565	26.6027	26.5326	53.559	940720000	71	6	7	5	8	9	6	4	9	6	10	49.3	29.804
RFC4	Replication factor C subunit 4	P35249;C9J8M3;C9JZI1;P35249-2;C9JXZ7;C9JTT7;C9JGY5;F8WE44;H7C1P0	P35249;C9J8M3;C9JZI1;P35249-2;C9JXZ7;C9JTT7	23.695	23.7523	23.9168	23.6141	23.6385	23.8019	22.0317	23.7701	23.8034	23.4198	11.44	146120000	24	3	3	2	2	2	3	1	3	2	3	11	39.681
RFC2	Replication factor C subunit 2	P35250;P35250-2;H7C5P4;A0A087WVY3;H7C5S7;H7C5P1;H7C5Q7;F8WC37;H7C5A0;H7C5G4	P35250;P35250-2	23.8836	23.8983	23.5234	23.8701	23.8427	23.7753	24.1572	23.8025	23.8887	24.0274	15.911	146360000	27	2	3	2	3	1	2	3	3	4	4	16.7	39.157
RFC1	Replication factor C subunit 1	P35251;P35251-2;H0Y8U4	P35251;P35251-2	23.0861	23.1272	23.1142	23.2833	23.3705	23.0434	23.5546	23.2168	23.3613	22.7715	9.6685	93037000	14	3	1	1	2	1	2	1	2	0	1	5.3	128.25
MYH9	Myosin-9	P35579;P35579-2;Q5BKV1;B1AH99;A0A0C4DFM8;A7E2Y1;P11055;P12882;Q9Y623;Q9UKX3;P13535;REV__E7EQT4;A1L2Z2;REV__S4R3H4;A0A087X0T3;REV__Q9UKV3-5;REV__Q9UKV3;Q9UKX2;P12883	P35579;P35579-2	29.7015	29.8145	30.2942	29.9682	29.7494	29.6529	29.3197	29.9068	29.5602	29.9864	323.31	9626300000	496	47	61	64	56	51	37	29	55	34	58	40.5	226.53
MYH10	Myosin-10	P35580;P35580-5;P35580-2;P35580-3;P35580-4;E7ERA5	P35580;P35580-5;P35580-2;P35580-3;P35580-4	26.9015	27.2754	27.6584	27.1275	27.0607	26.3001	26.2456	26.8554	26.5636	27.0921	164.24	1275500000	144	16	18	20	17	16	3	6	18	8	22	28.6	229
NUP214	Nuclear pore complex protein Nup214	P35658-2;P35658;P35658-5;P35658-4;P35658-3;A0A0A0MSW3;H0YF36;E9PKD2;B7ZAV2;H0Y837;H0YDS4	P35658-2;P35658;P35658-5;P35658-4;P35658-3;A0A0A0MSW3	25.623	25.9077	25.6708	25.8113	25.7672	26.021	25.9457	25.3422	26.0632	25.48	59.126	558480000	89	7	10	12	11	9	6	5	11	7	11	11.1	212.57
RPL4	60S ribosomal protein L4	P36578;H3BM89;H3BU31;H3BTP7	P36578;H3BM89	24.2387	23.9962	23.8407	23.8934	23.8844	23.8571	24.087	24.3458	24.2693	24.243	15.751	183350000	28	6	2	3	3	3	1	1	2	1	5	18.5	47.697
FDFT1	Squalene synthase	P37268-5;P37268;E9PNM1;P37268-4;P37268-3;P37268-2;E9PJG4	P37268-5;P37268;E9PNM1;P37268-4;P37268-3;P37268-2	NaN	23.9195	24.0241	24.0961	23.7293	23.8564	23.7994	23.4912	24.0518	23.5089	16.289	121160000	15	1	2	4	1	1	1	1	2	1	1	13.6	43.06
RBMX;RBMXL1	RNA-binding motif protein, X chromosome;RNA-binding motif protein, X chromosome, N-terminally processed;RNA binding motif protein, X-linked-like-1	P38159;P38159-2;H3BT71;Q96E39;H0Y6E7;H3BUY5;H3BR27;P38159-3;H3BNC1;O75526;Q8N7X1	P38159;P38159-2;H3BT71;Q96E39;H0Y6E7;H3BUY5	27.0586	27.2443	27.2185	27.431	26.9499	27.1748	27.4759	27.3068	27.5973	27.281	54.551	1508700000	108	9	12	13	11	10	6	9	12	10	13	33.2	42.331
HSPA9	Stress-70 protein, mitochondrial	P38646;D6RA73;D6RJI2;H0Y8S0	P38646	25.2807	25.849	25.7076	25.5188	25.6886	24.9906	25.5629	25.8814	25.5747	25.6014	56.131	491700000	73	7	9	10	7	9	5	6	6	5	7	22.5	73.68
EIF4A3	Eukaryotic initiation factor 4A-III;Eukaryotic initiation factor 4A-III, N-terminally processed	P38919;I3L3H2	P38919	25.5742	25.8433	25.5009	25.5797	25.5408	25.7837	25.7545	25.5584	26.046	25.5123	39.567	494060000	44	5	5	6	3	5	3	3	4	2	7	22.6	46.871
RPS19	40S ribosomal protein S19	P39019;A0A075B6E2;M0R2L9;M0QXK4;M0QYF7;M0R140	P39019;A0A075B6E2	24.4189	24.3778	24.5114	24.5071	24.2905	24.8112	24.5987	24.4534	24.8273	24.1321	10.184	223630000	23	2	2	2	3	3	2	3	2	2	2	26.2	16.06
RPL13A;RPL13a;RPL13AP3	60S ribosomal protein L13a;Putative 60S ribosomal protein L13a protein RPL13AP3	P40429;Q8J015;M0QYS1;Q6NVV1;M0QZU1;A0A096LPE0	P40429;Q8J015;M0QYS1;Q6NVV1	NaN	23.3974	23.5128	22.7548	23.321	22.7618	22.4751	24.3259	22.9912	23.5941	7.2329	99564000	15	0	1	2	1	2	1	1	2	1	2	14.8	23.577
RFC3	Replication factor C subunit 3	P40938;P40938-2;A0A087X270	P40938;P40938-2	23.3193	23.9557	23.5287	24.4964	23.8699	24.0985	24.3949	23.7713	24.4095	23.6398	25.324	176860000	21	5	2	2	2	2	2	1	2	1	2	15.4	40.556
TMPO	Lamina-associated polypeptide 2, isoform alpha;Thymopoietin;Thymopentin	P42166;P42167-3	P42166	29.0896	29.2292	29.4182	29.0065	28.945	28.909	29.1598	28.8098	29.0202	28.9535	196.51	5130900000	154	13	20	19	16	14	12	11	17	12	18	44.4	75.491
TMPO	Lamina-associated polypeptide 2, isoforms beta/gamma;Thymopoietin;Thymopentin	P42167;G5E972;P42167-2;H0YJH7	P42167;G5E972;P42167-2	27.4701	27.3667	27.1761	26.9473	26.655	26.2482	26.8376	26.1898	26.321	26.4395	33.953	1305700000	54	7	10	6	4	5	2	7	3	4	6	45.4	50.67
SKIV2L2	Superkiller viralicidic activity 2-like 2	P42285;H0Y8U3	P42285	NaN	23.1582	24.0959	23.5228	23.8606	23.5272	22.7866	24.25	22.8078	23.3434	15.257	105860000	16	1	1	3	3	1	1	0	2	1	3	5.6	117.8
LRPPRC	Leucine-rich PPR motif-containing protein, mitochondrial	P42704	P42704	NaN	24.7962	22.5995	25.406	25.5832	NaN	25.7093	25.6609	25.5654	25.3003	6.2572	309620000	9	1	1	4	0	1	0	0	1	1	0	3.7	157.9
CBX5	Chromobox protein homolog 5	P45973;F8VNY3	P45973	24.9726	24.6529	24.6537	24.571	22.933	24.7163	25.3164	NaN	24.8333	24.7302	9.5807	223660000	17	2	3	2	1	1	1	2	0	2	3	26.7	22.225
RANGAP1	Ran GTPase-activating protein 1	P46060;H0Y4Q3;B0QYT5;B0QYT4;B0QYT6	P46060;H0Y4Q3	25.9686	25.8584	26.3019	25.6374	25.5188	24.9123	25.4224	25.5583	25.4243	25.8384	83.691	532620000	73	10	10	8	8	5	3	5	10	5	9	26.9	63.541
STT3A	Dolichyl-diphosphooligosaccharide--protein glycosyltransferase subunit STT3A	P46977;P46977-2;A0A0C4DH80;E9PN73;E9PI32	P46977;P46977-2	23.4731	23.0768	23.6407	23.2526	23.3427	22.9669	23.0275	22.8385	23.438	23.0129	6.9509	90148000	16	3	1	4	2	2	1	0	1	1	1	7.1	80.529
CAPZB	F-actin-capping protein subunit beta	P47756-2;B1AK87;B1AK88;P47756;B1AK85	P47756-2;B1AK87;B1AK88;P47756;B1AK85	22.3439	22.4287	23.081	22.5865	22.791	22.5693	22.8647	22.8932	22.6956	22.7744	4.3981	65506000	12	0	1	2	1	2	0	1	4	0	1	24.6	30.628
IDH2	Isocitrate dehydrogenase [NADP], mitochondrial	P48735-2;P48735	P48735-2;P48735	22.7863	22.8772	22.7113	NaN	22.7816	22.7245	22.837	23.3098	22.9969	22.6477	8.2252	68700000	12	1	1	0	2	1	1	1	2	1	1	6.8	45.179
FASN	Fatty acid synthase;[Acyl-carrier-protein] S-acetyltransferase;[Acyl-carrier-protein] S-malonyltransferase;3-oxoacyl-[acyl-carrier-protein] synthase;3-oxoacyl-[acyl-carrier-protein] reductase;3-hydroxyacyl-[acyl-carrier-protein] dehydratase;Enoyl-[acyl-carrier-protein] reductase;Oleoyl-[acyl-carrier-protein] hydrolase	P49327	P49327	22.9676	23.9593	22.821	23.7898	23.409	23.1521	22.9325	25.0408	23.2859	24.4431	19.264	156420000	28	1	3	1	3	1	1	0	8	1	6	4.2	273.42
TUFM	Elongation factor Tu, mitochondrial	P49411	P49411	24.133	24.3612	24.2819	24.2618	24.3891	24.137	24.7142	25.1178	24.5515	24.8821	18.71	219400000	21	3	2	1	3	1	1	2	3	2	2	14.6	49.541
MCM2	DNA replication licensing factor MCM2	P49736;H0Y8E6;F8WDM3	P49736;H0Y8E6	23.2571	23.9933	23.719	23.7194	23.5752	23.7764	23.551	23.8864	23.7499	23.8028	31.69	130070000	22	1	3	3	3	2	3	1	2	0	4	10.8	101.89
YLPM1	YLP motif-containing protein 1	P49750;P49750-4;P49750-3;F8VU51;H0YIQ2	P49750;P49750-4;P49750-3;F8VU51;H0YIQ2	23.7103	23.5493	23.8225	23.8103	23.6899	23.8582	23.7997	23.7941	24.1019	23.6813	18.305	137630000	22	1	3	4	3	2	1	2	2	1	3	4.5	219.98
NUP153	Nuclear pore complex protein Nup153	P49790-3;P49790;P49790-2	P49790-3;P49790;P49790-2	24.9276	25.4274	25.4065	25.1336	25.0604	25.5283	25.2807	24.7197	25.544	24.9728	48.514	375630000	60	7	7	12	5	4	4	3	6	6	6	13.4	157.34
RANBP2	E3 SUMO-protein ligase RanBP2	P49792;Q99666;O14715;J3KQ37;F8VYC4;P0DJD0;P0DJD1;F8W705;Q99666-2;Q7Z3J3-2;F8WBP7;H0YBN8;C9J1W9;C9JF75;C9J6W1;H7BZ48	P49792	27.1139	27.2209	26.4784	26.3877	26.7479	27.2112	26.9514	26.6717	26.4392	27.1166	132.91	1132600000	149	14	17	22	13	14	11	9	19	10	20	16.8	358.2
EMD	Emerin	P50402;Q5HY57;F8WEQ1	P50402;Q5HY57	25.2119	25.6651	25.7196	25.6504	25.4267	25.558	25.5311	25.7903	25.7454	25.1379	59.211	472340000	51	4	7	7	5	4	5	3	8	4	4	40.6	28.994
DNM2	Dynamin-2	P50570-2;P50570-3;P50570-4;P50570;P50570-5;Q9UQ16-4;E5RHK8;Q9UQ16;Q9UQ16-3;Q9UQ16-2;Q9UQ16-5;Q05193;Q05193-2;E5RIK2;Q05193-5;Q05193-3;A0A0D9SFE4;K7EMQ3;A0A0D9SFB1;K7EPK9	P50570-2;P50570-3;P50570-4;P50570;P50570-5	23.2909	22.6642	23.9403	23.3951	23.5747	22.6439	22.2826	23.2329	22.3631	23.9058	19.464	110320000	17	3	1	5	2	2	0	0	1	0	3	9.2	97.651
CCT8	T-complex protein 1 subunit theta	P50990-2;P50990;P50990-3;H7C4C8;H7C2U0	P50990-2;P50990;P50990-3	24.5665	25.1077	24.9285	24.9285	25.2019	24.5144	25.239	25.8602	25.0805	25.7409	43.069	400530000	55	5	4	6	6	5	3	5	7	1	7	24.8	57.645
CCT4	T-complex protein 1 subunit delta	P50991;P50991-2	P50991;P50991-2	24.1525	24.6597	24.7615	24.4849	24.7837	24.6484	24.9269	25.1425	25.4164	25.0857	27.954	310560000	40	3	2	3	3	3	2	3	7	3	8	19.5	57.924
HNRNPA3	Heterogeneous nuclear ribonucleoprotein A3	P51991;P51991-2;H7C1J8	P51991;P51991-2	27.0096	26.2753	26.689	26.3635	26.2517	26.3444	26.4473	26.0427	25.6674	26.4505	53.236	958100000	55	7	4	5	4	5	4	5	5	2	6	25.1	39.594
HNRNPM	Heterogeneous nuclear ribonucleoprotein M	P52272-2;P52272;A0A087X0X3;M0R2I7;M0R2T0;M0R0N3;M0QYQ7;M0R0Y6;M0QY96;M0QYL3	P52272-2;P52272;A0A087X0X3	27.9661	27.883	27.9722	28.0309	27.7715	28.1579	28.1042	27.8201	27.9195	27.8384	83.445	2564000000	219	24	26	25	21	21	18	15	27	19	20	39.9	73.62
KPNA2	Importin subunit alpha-1	P52292;J3QLL0;J3KS65;J3QL07	P52292;J3QLL0;J3KS65	24.8424	25.2151	25.1728	24.4252	24.8852	24.132	24.6234	24.867	24.95	24.9196	48.961	282940000	42	5	4	7	4	4	2	3	5	3	5	20.2	57.861
HNRNPF	Heterogeneous nuclear ribonucleoprotein F;Heterogeneous nuclear ribonucleoprotein F, N-terminally processed	P52597	P52597	27.6135	27.6177	27.6171	27.3487	27.1163	27.0426	27.6436	27.6536	26.826	27.3116	63.933	1910500000	84	12	9	11	8	9	5	6	9	6	6	35.4	45.671
KIF11	Kinesin-like protein KIF11	P52732	P52732	21.9782	23.534	23.4325	22.7409	22.5103	22.8663	NaN	22.338	22.4811	22.5275	7.7548	65907000	10	0	1	0	0	2	1	0	2	1	3	4.5	119.16
NUP98	Nuclear pore complex protein Nup98-Nup96;Nuclear pore complex protein Nup98;Nuclear pore complex protein Nup96	P52948-6;P52948-5;P52948;P52948-2;H7C3P6;P52948-4;P52948-3;H0YCT1;H0YDF4;H0YEN4	P52948-6;P52948-5;P52948;P52948-2;H7C3P6	27.3876	27.7048	27.7117	27.7958	27.6132	27.472	27.0879	27.2433	27.6924	27.5206	107.06	1788200000	140	14	17	18	18	15	7	10	12	14	15	17.3	186.27
SUB1	Activated RNA polymerase II transcriptional coactivator p15	P53999	P53999	NaN	23.1821	22.9506	23.3605	22.9993	23.5041	23.2801	24.1092	23.1922	23.2826	4.6412	109180000	14	1	1	1	2	2	1	0	2	1	1	15.7	14.395
VCP	Transitional endoplasmic reticulum ATPase	P55072;C9JUP7;C9IZA5	P55072	24.2338	24.2402	24.4517	24.7527	24.6642	24.2531	24.2989	24.7228	24.3915	24.7648	35.836	274080000	39	2	2	4	9	5	1	2	6	2	4	18.1	89.321
ADAR	Double-stranded RNA-specific adenosine deaminase	P55265;P55265-4;H0YCK3;P55265-3;P55265-2;P55265-5	P55265;P55265-4;H0YCK3;P55265-3;P55265-2;P55265-5	26.3006	26.5757	26.6536	26.9475	26.7061	26.8126	26.5708	28.9091	27.1691	27.0605	117.83	1692400000	142	10	14	14	11	13	11	4	28	10	20	27.3	136.06
HNRNPH2	Heterogeneous nuclear ribonucleoprotein H2	P55795	P55795	25.587	25.9185	25.9824	24.5032	25.3872	24.3835	25.1679	24.9772	24.6248	26.1303	26.201	462500000	39	3	7	6	4	6	1	2	3	1	5	33.6	49.263
RRP1	Ribosomal RNA processing protein 1 homolog A	P56182;D6RE82	P56182;D6RE82	NaN	22.5057	NaN	22.2687	21.7074	22.2575	NaN	22.71	23.3453	22.0027	13.843	43503000	11	0	2	1	1	1	0	1	2	2	1	4.8	52.839
EIF6	Eukaryotic translation initiation factor 6	P56537;B7ZBH1;P56537-2;F8WD20;A0A0B4J1Y7;F8WDS6	P56537;B7ZBH1;P56537-2	25.0367	25.0345	25.0447	25.1906	25.063	25.0968	25.0603	24.9304	25.3067	25.0282	29.976	314600000	30	3	3	2	3	3	3	3	3	3	3	15.5	26.599
NUP107	Nuclear pore complex protein Nup107	P57740;P57740-2;P57740-3;H0YG15;G3V1T4	P57740;P57740-2;P57740-3	26.1671	26.2373	27.3279	26.772	26.7645	26.382	26.3657	25.6776	26.4431	26.975	60.407	937890000	74	8	7	9	7	9	5	6	5	7	11	18.1	106.37
SEC61B	Protein transport protein Sec61 subunit beta	P60468;S4R3B5	P60468	NaN	25.3721	24.9376	25.2755	24.9803	25.3028	25.4379	24.9404	25.3505	24.8104	13.598	303200000	21	2	2	1	2	3	2	3	2	1	3	37.5	9.9743
ACTB;ACTC1;ACTG2;ACTA2;ACTA1	Actin, cytoplasmic 1;Actin, cytoplasmic 1, N-terminally processed;Actin, alpha cardiac muscle 1;Actin, gamma-enteric smooth muscle;Actin, aortic smooth muscle;Actin, alpha skeletal muscle	P60709;P68032;P63267;P62736;P68133;A6NL76;P63267-2;E7EVS6;G5E9R0;C9JTX5;Q562R1;C9JZR7;F8WB63;F6UVQ4;B8ZZJ2;F6QUT6;C9JUM1;C9JFL5;Q6S8J3;A5A3E0;P0CG38;P0CG39;Q9BYX7;F8WCH0	P60709;P68032;P63267;P62736;P68133;A6NL76	27.5999	28.0921	27.6925	28.0803	28.1005	28.0435	27.7937	30.2666	28.2453	28.4969	96.255	4743300000	159	13	17	14	10	10	12	14	23	12	14	45.6	41.736
EIF4A1;EIF4A2	Eukaryotic initiation factor 4A-I;Eukaryotic initiation factor 4A-II;Eukaryotic initiation factor 4A-II, N-terminally processed	P60842;P60842-2;J3KT12;Q14240-2;Q14240;E7EQG2;J3QS69;J3QL43;J3KTB5;J3KS25;J3KSZ0;J3QLN6;J3QR64;J3QKZ9;J3KTN0;J3KSN7;J3QL52;J3KT04;E7EMV8;J3KS93	P60842;P60842-2;J3KT12;Q14240-2;Q14240;E7EQG2;J3QS69;J3QL43;J3KTB5;J3KS25;J3KSZ0;J3QLN6;J3QR64;J3QKZ9	24.861	25.2324	24.7898	24.959	25.0282	25.1533	25.211	25.154	25.6206	25.0075	48.152	344710000	35	4	3	5	3	2	2	2	4	2	5	19.7	46.153
RAB8A;RAB8B;RAB1B;RAB1A;RAB15;RAB10;RAB13;RAB1C	Ras-related protein Rab-8A;Ras-related protein Rab-1A;Ras-related protein Rab-15;Ras-related protein Rab-8B;Ras-related protein Rab-10;Ras-related protein Rab-13;Putative Ras-related protein Rab-1C;Ras-related protein Rab-1B	P61006;H0YLJ8;H0YMN7;A0A087WTI1;E9PLD0;E7END7;H0YNE9;H0YL94;P62820;P59190-2;P61006-2;Q92930;P61026;P51153;Q92928;Q9H0U4;P62820-2;P62820-3;P59190	P61006;H0YLJ8;H0YMN7;A0A087WTI1;E9PLD0;E7END7;H0YNE9;H0YL94;P62820;P59190-2;P61006-2;Q92930;P61026;P51153;Q92928;Q9H0U4;P62820-2;P62820-3;P59190	23.3056	23.5774	23.3117	23.3932	23.4504	23.4967	23.6153	23.4248	23.6505	23.2867	5.3774	116700000	10	1	1	1	1	1	0	0	1	0	3	12.1	23.668
ARF3;ARF1	ADP-ribosylation factor 3;ADP-ribosylation factor 1	P61204-2;P84077;P61204;F5H423;H0YGG7	P61204-2;P84077;P61204;F5H423	19.427	21.3647	20.0873	20.6129	19.3997	NaN	NaN	22.9945	20.247	24.9387	18.16	230180000	16	0	2	0	0	0	1	0	3	0	3	30.6	16.145
HNRNPK	Heterogeneous nuclear ribonucleoprotein K	P61978-3;P61978-2;P61978;Q5T6W2;S4R359;S4R457	P61978-3;P61978-2;P61978;Q5T6W2	29.3313	29.6156	29.552	29.7133	29.3275	29.4229	29.4439	29.6519	29.3383	29.5212	135.27	7176400000	153	19	16	16	16	12	9	13	16	12	18	46.4	48.562
RPS7	40S ribosomal protein S7	P62081;B5MCP9	P62081;B5MCP9	NaN	23.6989	22.8536	22.8893	23.1508	23.116	23.1835	24.1037	23.002	23.1875	2.9844	95759000	10	0	2	1	1	1	1	0	2	1	1	19.1	22.127
PPP1CB	Serine/threonine-protein phosphatase PP1-beta catalytic subunit;Serine/threonine-protein phosphatase	P62140;C9JP48;C9J9S3;E7ETD8;H0Y3Y6	P62140;C9JP48;C9J9S3;E7ETD8	23.752	24.2726	23.8535	24.0531	23.8024	23.924	NaN	24.7173	24.0801	24.0876	8.2124	155770000	14	3	3	2	1	1	1	0	2	1	0	12.8	37.186
RPS8	40S ribosomal protein S8	P62241;Q5JR95	P62241;Q5JR95	24.6676	25.0301	25.2558	24.6807	24.6286	24.0309	23.8812	25.7272	24.3154	25.3697	45.585	329280000	33	4	4	5	2	2	2	2	3	3	4	39.4	24.205
YWHAE	14-3-3 protein epsilon	P62258;P62258-2;B4DJF2;I3L3T1;K7EIT4;I3L0W5;K7EM20	P62258;P62258-2;B4DJF2;I3L3T1;K7EIT4	NaN	23.5432	22.4161	24.1013	23.1645	23.7075	23.2364	25.0092	22.9056	24.5391	8.7802	196730000	16	0	2	1	4	0	0	0	2	1	3	15.3	29.174
RPS14	40S ribosomal protein S14	P62263;H0YB22;E5RH77	P62263	25.3101	25.3158	25.007	25.6034	25.0637	25.6771	23.0919	26.1839	25.8292	25.5894	27.475	436500000	21	2	1	2	2	2	2	1	3	2	2	16.6	16.273
RPS18	40S ribosomal protein S18	P62269;A0A0G2JQH2;Q5GGW2;J3JS69	P62269	25.4121	24.8818	24.8763	25.2653	25.2134	25.3753	25.2395	25.5054	25.4272	25.0459	23.939	438680000	24	2	2	2	2	2	2	2	3	2	4	27	17.718
SNRPD2	Small nuclear ribonucleoprotein Sm D2	P62316;K7ERG4;P62316-2;K7EJB5	P62316;K7ERG4;P62316-2	25.7488	24.5826	25.0607	25.0587	25.126	25.5647	25.6158	24.8858	25.6756	24.7548	16.724	376820000	36	4	3	5	2	3	3	3	4	4	5	44.1	13.527
RPL7A	60S ribosomal protein L7a	Q5T8U3;P62424	Q5T8U3;P62424	24.2541	24.5155	23.6798	24.4882	23.6723	24.4964	24.2609	24.6098	24.4257	23.7661	5.6778	184880000	22	2	2	2	2	2	2	2	2	3	2	18.8	21.545
RPS4X;RPS4Y2;RPS4Y1	40S ribosomal protein S4, X isoform;40S ribosomal protein S4, Y isoform 2;40S ribosomal protein S4, Y isoform 1	P62701;Q8TD47;C9JEH7;P22090	P62701;Q8TD47;C9JEH7;P22090	22.3079	23.56	23.2874	23.3901	23.4065	23.7065	23.5375	24.5523	23.6778	24.1318	14.006	123560000	22	3	3	3	0	1	2	1	4	1	3	27.4	29.597
RPS6	40S ribosomal protein S6	P62753;A2A3R7;A2A3R5	P62753;A2A3R7;A2A3R5	23.9585	24.1859	24.0143	24.6579	24.2978	24.1407	24.0553	24.0678	24.4957	24.3334	6.8173	196450000	13	2	1	2	1	1	1	1	2	1	1	16.9	28.68
HIST1H4A	Histone H4	P62805	P62805	32.8367	33.2207	33.1433	32.5728	32.4711	32.3013	32.8443	32.695	32.2665	32.682	127.12	68575000000	280	25	32	35	26	25	18	24	29	21	25	61.2	11.367
RPL23	60S ribosomal protein L23	P62829;C9JD32;B9ZVP7;J3KT29;J3KTJ3	P62829;C9JD32;B9ZVP7;J3KT29	23.7335	23.5909	23.2781	23.2058	23.3328	23.4299	23.6834	NaN	23.3784	23.5735	7.2174	101200000	12	2	1	2	0	1	1	1	1	1	2	32.1	14.865
RPS25	40S ribosomal protein S25	P62851	P62851	24.6668	24.461	24.658	24.4169	24.3836	24.5711	24.2766	24.5596	24.2715	24.5533	8.3449	245010000	30	3	4	4	3	2	2	2	4	2	3	28	13.742
RPS28	40S ribosomal protein S28	P62857	P62857	23.6103	24.084	24.1622	24.1791	23.9162	23.6989	23.8001	24.1556	24.0852	24.5203	16.381	163520000	21	1	3	2	2	2	1	2	3	3	2	46.4	7.8409
RPL10A	60S ribosomal protein L10a	P62906	P62906	24.0683	23.2541	23.0238	23.7362	NaN	24.0172	23.4848	23.1008	24.0976	23.1435	4.2613	108690000	19	2	2	3	2	1	2	2	1	2	2	12.9	24.831
RPL11	60S ribosomal protein L11	P62913;P62913-2;Q5VVC8;Q5VVC9	P62913;P62913-2;Q5VVC8	25.4384	25.2297	25.4773	25.4123	25.243	25.2775	25.2804	25.5657	25.8088	25.2381	29.448	426740000	41	4	4	3	3	2	3	4	6	5	5	28.1	20.252
PPIA	Peptidyl-prolyl cis-trans isomerase A;Peptidyl-prolyl cis-trans isomerase A, N-terminally processed;Peptidyl-prolyl cis-trans isomerase	P62937;F8WE65;C9J5S7;P62937-2;P0DN26;A0A0H2UH34;A0A0B4J2A2;A0A075B767;A0A075B759;Q9Y536;F5H284;P0DN37	P62937;F8WE65;C9J5S7;P62937-2	NaN	24.8071	24.8108	24.5509	24.3557	24.3869	24.5745	25.0778	23.9895	24.5689	6.9866	245900000	21	2	3	4	3	1	0	0	3	2	2	30.3	18.012
TRA2B	Transformer-2 protein homolog beta	P62995-3;P62995;H7C2L4;H7BXF3	P62995-3;P62995;H7C2L4;H7BXF3	24.2464	24.1221	24.2611	23.7466	23.0936	23.574	23.9473	23.9658	23.9259	24.054	7.9562	156580000	25	2	3	3	3	1	2	2	3	2	4	22.3	21.935
GNB2L1	Guanine nucleotide-binding protein subunit beta-2-like 1;Guanine nucleotide-binding protein subunit beta-2-like 1, N-terminally processed	P63244;H0Y8W2;J3KPE3;H0YAF8;D6REE5;D6R9L0;D6RAC2;H0YAM7;D6R9Z1;D6RFX4;D6RHH4;D6RFZ9;D6RBD0;E9PD14;D6RAU2;H0Y8R5;H0Y9P0;D6RF23;D6R909;D6RGK8	P63244;H0Y8W2;J3KPE3;H0YAF8;D6REE5;D6R9L0;D6RAC2;H0YAM7;D6R9Z1;D6RFX4;D6RHH4	24.593	24.9741	25.2588	24.5101	24.585	24.439	24.9089	25.6414	24.4497	24.9152	18.239	309950000	31	1	4	6	4	1	2	2	6	1	3	26.8	35.076
EEF1A1P5;EEF1A1	Putative elongation factor 1-alpha-like 3;Elongation factor 1-alpha 1;Elongation factor 1-alpha	Q5VTE0;P68104;A0A087WVQ9;P68104-2;A0A087WV01;Q05639;A6PW80;Q5JR01	Q5VTE0;P68104;A0A087WVQ9;P68104-2;A0A087WV01	29.4114	29.1354	29.0922	28.9958	28.9499	29.2826	29.3843	29.0009	29.4292	28.8055	41.315	5843400000	127	13	15	14	13	10	8	12	14	11	10	29.7	50.184
TUBA1B;TUBA1A;TUBA1C;TUBA4A	Tubulin alpha-1B chain;Tubulin alpha-1A chain;Tubulin alpha-1C chain;Tubulin alpha-4A chain	P68363;Q71U36-2;Q9BQE3;F5H5D3;Q71U36;P68366;P68366-2;P68363-2;F8VQQ4;Q9NY65;C9J2C0;Q9NY65-2;F8VVB9;C9JDS9;F8VS66;F8VRZ4;F8VX09;F8VWV9;C9JEV8;C9JQ00;C9JJQ8;A6NHL2-2;V9GZ17;A6NHL2;F8VRK0;C9JDL2;Q9H853;F8W0F6;C9K0S6;F8VXZ7	P68363;Q71U36-2;Q9BQE3;F5H5D3;Q71U36;P68366;P68366-2;P68363-2	27.3417	27.7584	27.5228	27.3647	27.3404	26.9574	27.2001	28.4205	27.4042	28.0654	57.334	2081700000	89	10	9	10	8	7	3	7	9	6	10	37.9	50.151
HIST2H3A;HIST3H3;HIST1H3A;H3F3B;H3F3A	Histone H3.2;Histone H3.1t;Histone H3.1;Histone H3;Histone H3.3	Q71DI3;Q16695;P68431;K7EK07;P84243;K7EMV3;B4DEB1;K7ES00;Q6NXT2;K7EP01	Q71DI3;Q16695;P68431;K7EK07;P84243;K7EMV3;B4DEB1;K7ES00	32.1702	31.6808	31.8347	31.7716	31.2391	31.5855	31.8803	31.4509	31.869	31.54	19.851	31676000000	95	8	11	11	11	8	5	8	12	7	10	32.4	15.388
RAE1	mRNA export factor	P78406;E9PPG9;E9PQ57;B0QZ36;B0QZ37	P78406;E9PPG9;E9PQ57	24.7254	25.4824	25.5026	25.0434	24.9532	24.2617	24.8311	24.7822	24.5409	25.3792	16.383	327760000	44	3	6	6	6	4	3	3	4	2	7	20.4	40.968
PRKDC	DNA-dependent protein kinase catalytic subunit	P78527;P78527-2;F5GX40;H0YG84	P78527;P78527-2	28.1507	28.1113	28.0677	27.9908	28.19	28.0125	27.9897	27.8283	28.2392	27.8403	252.4	2563700000	297	35	33	38	33	28	19	15	32	26	38	18.2	469.08
DCD	Dermcidin;Survival-promoting peptide;DCD-1	P81605;P81605-2	P81605;P81605-2	27.9387	26.3549	25.737	23.7108	27.7392	27.8503	26.5232	26.5167	26.8706	26.7647	7.5342	1431500000	22	2	1	1	1	2	3	2	2	2	2	20	11.284
SARNP	SAP domain-containing ribonucleoprotein	P82979;F8VZQ9;H0YHG0;F8VS12	P82979;F8VZQ9;H0YHG0	23.2611	23.6278	23.0672	23.7098	23.1387	23.3144	23.461	23.5271	23.3538	23.8085	7.7409	114870000	14	2	1	2	2	2	0	0	2	0	3	22.4	23.671
ERH	Enhancer of rudimentary homolog	P84090;G3V279	P84090;G3V279	26.1654	25.5361	25.8218	25.5454	25.8889	25.8387	25.9632	25.17	26.0441	25.7819	64.565	520840000	28	3	2	3	3	3	3	3	2	2	3	37.5	12.259
SLC25A3	Phosphate carrier protein, mitochondrial	Q00325-2;Q00325;F8VVM2;F8VZL5;F8VWR4;F8VWQ0	Q00325-2;Q00325;F8VVM2	26.0089	26.5203	25.6293	26.5435	26.2627	26.9448	26.8702	26.184	26.9769	25.8107	19.252	807490000	26	2	3	3	2	2	2	3	3	4	2	9.7	39.958
HNRNPU	Heterogeneous nuclear ribonucleoprotein U	Q00839;Q00839-2;Q5RI18	Q00839;Q00839-2	27.9652	27.8519	27.7432	27.5134	27.7308	27.7029	27.9473	27.8375	27.845	27.6654	132.13	2306100000	113	12	14	12	10	12	6	6	14	7	10	24.4	90.583
U2AF1;U2AF1L4	Splicing factor U2AF 35 kDa subunit;Splicing factor U2AF 26 kDa subunit	Q01081;Q01081-2;Q01081-4;Q8WU68-3;Q8WU68;K7EJH3;K7EJM7;M0QYK5;M0R2N4;Q01081-3;Q8WU68-2	Q01081;Q01081-2;Q01081-4;Q8WU68-3;Q8WU68	24.2601	24.254	24.059	24.7044	24.4303	24.8809	24.9889	24.2886	24.7607	24.0343	23.61	218130000	24	3	2	2	2	3	3	2	2	2	2	17.5	27.872
SPTBN1	Spectrin beta chain, non-erythrocytic 1	Q01082;A0A087WUZ3;Q01082-3;Q01082-2;F8W6C1	Q01082;A0A087WUZ3;Q01082-3;Q01082-2	26.2714	26.6807	26.9841	27.1454	26.669	26.2045	25.9452	26.1981	26.8624	26.6355	119.77	973000000	151	16	17	21	16	20	7	9	12	12	21	18.7	274.61
TIAL1	Nucleolysin TIAR	Q01085-2;Q01085;E7ETC0;A6NKZ9;E7ETJ9	Q01085-2;Q01085	26.7655	26.1891	26.4241	26.0295	26.3267	26.482	27.2916	26.3241	26.721	26.4057	53.61	910330000	56	5	5	5	5	5	2	6	6	5	4	21.4	43.448
EXOSC10	Exosome component 10	Q01780-2;Q01780	Q01780-2;Q01780	23.1542	23.0851	23.2826	23.206	23.7668	23.0889	23.2953	23.2924	23.3465	23.9939	7.6842	96616000	13	1	1	3	2	2	1	0	1	0	2	8.4	98.088
DSG1	Desmoglein-1	Q02413;Q02413-2	Q02413	26.2068	25.6767	25.3832	26.3626	26.3858	26.4458	26.3839	25.0834	25.1765	25.7491	54.208	884510000	86	7	8	5	11	7	8	7	2	2	4	16.6	113.75
RPL6	60S ribosomal protein L6	Q02878;F8VR69;F8VZ45;U3KQR5	Q02878	24.2413	23.5727	23.4909	24.1136	24.0316	24.1283	24.2604	24.7388	24.2933	24.1017	4.2632	185980000	10	1	2	4	1	0	0	0	1	0	1	12.2	32.728
TOP2B	DNA topoisomerase 2-beta;DNA topoisomerase 2	Q02880-2;Q02880;E9PCY5;H7BZ82	Q02880-2;Q02880;E9PCY5	24.4911	25.1141	25.0452	24.842	25.0486	25.0494	25.171	24.855	25.5042	24.9736	31.718	311230000	57	6	6	10	4	6	4	4	5	6	6	16.5	182.66
KHDRBS1	KH domain-containing, RNA-binding, signal transduction-associated protein 1	Q07666;Q07666-2;Q07666-3;O75525-2;O75525;Q5VWX1	Q07666;Q07666-2;Q07666-3	27.0502	27.291	27.5516	26.8809	26.2233	26.5786	27.3824	27.0162	26.313	27.3202	18.086	1499300000	80	8	10	9	7	8	6	7	9	6	10	16.7	48.227
TGM3	Protein-glutamine gamma-glutamyltransferase E;Protein-glutamine gamma-glutamyltransferase E 50 kDa catalytic chain;Protein-glutamine gamma-glutamyltransferase E 27 kDa non-catalytic chain	Q08188	Q08188	22.7145	22.1165	21.9574	21.918	23.0433	NaN	22.1125	20.866	21.9853	21.1653	12.312	68639000	15	3	2	0	1	2	1	1	0	0	0	9.5	76.631
DHX9	ATP-dependent RNA helicase A	Q08211;Q08211-2	Q08211	29.1534	29.3132	29.5003	29.6799	29.2981	29.4048	29.0948	29.1071	29.3172	29.2656	253.7	6640900000	203	18	24	28	18	19	17	15	23	15	25	25.4	140.96
DSC1	Desmocollin-1	Q08554-2;Q08554	Q08554-2;Q08554	24.4866	24.1911	23.4302	25.3959	24.0137	25.0923	25.2517	23.1114	23.1141	22.3585	28.75	245780000	31	3	3	0	3	2	3	4	2	2	2	8.9	93.834
SSRP1	FACT complex subunit SSRP1	Q08945;E9PPZ7;E9PMD4	Q08945	26.8387	26.3874	27.1071	25.875	26.6377	25.399	26.1365	26.5072	26.3656	26.8948	32.954	896280000	60	6	5	9	5	6	3	3	6	8	9	16.9	81.074
RBBP4;RBBP7	Histone-binding protein RBBP4;Histone-binding protein RBBP7	Q09028;Q09028-3;Q09028-2;Q09028-4;Q16576-2;Q16576;E9PC52;H0YF10;E9PNS2;E9PNS6;E9PIC4;Q5JP02;H0YEU5;H0YCT5;H0YDK2;C9JPP3;Q5JP01;Q5JNZ6;C9JAJ9	Q09028;Q09028-3;Q09028-2;Q09028-4;Q16576-2;Q16576;E9PC52	24.56	25.1137	25.2682	24.5739	25.0346	25.2166	25.3564	25.3521	25.3019	25.5762	36.687	361080000	43	3	5	6	3	5	4	2	6	3	6	17.4	47.655
CPSF1	Cleavage and polyadenylation specificity factor subunit 1	Q10570;A0A087X101	Q10570	25.3461	25.362	25.3398	25.6355	25.2535	25.2389	24.9421	24.7393	25.2574	25.159	45.383	382790000	44	7	6	6	3	5	3	2	5	3	4	7.6	160.88
NUP160	Nuclear pore complex protein Nup160	Q12769;G3V198;E9PR16;Q12769-2;E9PSI3;Q12769-3	Q12769;G3V198;E9PR16	25.8365	26.0096	26.2579	25.4459	25.6499	25.3252	25.3913	25.3924	25.2755	25.8677	57.242	555940000	62	8	7	8	5	6	7	2	6	4	9	10.7	162.12
SF3A3	Splicing factor 3A subunit 3	Q12874	Q12874	24.2501	24.1017	24.4936	24.4591	24.1694	24.3359	24.2807	24.3972	24.5826	24.2485	20.708	203050000	26	3	4	4	3	3	1	2	2	1	3	10.4	58.848
ILF3	Interleukin enhancer-binding factor 3	Q12906;Q12906-7;Q12906-5;Q12906-4;Q12906-2;Q12906-6;Q12906-3;K7EKJ9;K7ERM6;K7ENK6;K7EM82;K7EJ09;K7ER69;K7EQR9;K7EQ75;K7ELV3	Q12906;Q12906-7;Q12906-5;Q12906-4;Q12906-2;Q12906-6;Q12906-3	27.1154	26.9311	27.3161	27.0175	26.9365	26.6709	26.7442	26.5728	26.6846	27.0967	69.566	1277400000	104	16	13	12	9	7	7	8	12	8	12	20.8	95.337
CSTF3	Cleavage stimulation factor subunit 3	Q12996;E9PLP8;H0YE74;Q12996-2	Q12996	23.0054	23.5885	23.9314	23.9711	23.2703	22.7698	22.5676	22.9312	22.3268	23.3431	17.585	98109000	24	3	4	3	2	3	1	1	3	0	4	10.7	82.921
ACACA	Acetyl-CoA carboxylase 1;Biotin carboxylase	Q13085-3;Q13085-2;Q13085;Q13085-4;Q59FY4;A0A087WWN5;O00763-3;O00763-2;O00763	Q13085-3;Q13085-2;Q13085;Q13085-4;Q59FY4	25.3967	25.7384	25.8518	25.6214	25.728	25.7918	26.66	26.0312	26.1271	25.8996	6.7413	624680000	16	2	3	2	1	0	0	1	4	1	2	3.5	257.24
TARDBP	TAR DNA-binding protein 43	Q13148;K7EJM5;A0A087WX29;K7EN94;B1AKP7;G3V162;A0A087X260;A0A087WYY0;A0A087WXQ5;A0A087WV68;Q13148-4;A0A087WW61;A0A087WX67;A0A087WXV3;A0A087WZC9	Q13148;K7EJM5;A0A087WX29;K7EN94;B1AKP7;G3V162;A0A087X260;A0A087WYY0;A0A087WXQ5;A0A087WV68;Q13148-4	25.7298	25.0092	24.9962	24.8985	24.073	24.6687	24.9847	25.2729	25.0889	24.3832	22.305	307300000	26	2	4	4	3	3	1	2	3	2	1	14.3	44.739
HNRNPA0	Heterogeneous nuclear ribonucleoprotein A0	Q13151	Q13151	24.2351	24.1949	24.51	24.6065	24.1457	24.6561	25.0069	25.0761	24.7114	24.5411	28.844	267400000	32	3	2	5	3	2	2	2	4	1	4	15.7	30.84
SRSF9	Serine/arginine-rich splicing factor 9	Q13242;H0YIB4;S4R3G0	Q13242;H0YIB4;S4R3G0	25.5487	25.321	25.1921	25.498	25.3672	25.1209	25.2508	25.0011	25.3484	25.42	20.085	401820000	37	4	4	4	5	3	1	4	4	4	4	31.2	25.542
SRSF6;SRSF4	Serine/arginine-rich splicing factor 6;Serine/arginine-rich splicing factor 4	Q13247-3;Q13247;A0A0D9SEM4;Q08170;B4DJK0;B4DUA4;Q13247-2;Q13243-3;Q13243	Q13247-3;Q13247;A0A0D9SEM4;Q08170	NaN	23.7507	24.1139	23.065	23.7281	23.8356	23.9559	24.5162	23.9029	23.8625	5.4785	134320000	12	1	0	2	1	1	1	1	3	1	1	8.4	38.418
TRIM28	Transcription intermediary factor 1-beta	Q13263;Q13263-2;M0R0K9	Q13263;Q13263-2;M0R0K9	23.4356	23.5577	23.4859	23.4721	24.5489	23.6891	24.1356	25.2316	24.1171	25.0538	15.939	204420000	17	1	1	2	1	2	0	1	5	1	3	13.2	88.549
EIF3I	Eukaryotic translation initiation factor 3 subunit I	Q13347;Q5TFK1	Q13347	20.4902	20.7657	NaN	21.3855	21.5836	21.2379	21.2353	22.228	21.5118	21.7109	2.9493	25318000	7	0	1	0	0	0	0	0	3	1	2	9.5	36.501
TRA2A	Transformer-2 protein homolog alpha	Q13595-4;Q13595-3;Q13595;Q13595-2	Q13595-4;Q13595-3;Q13595;Q13595-2	23.1122	21.0221	23.0154	22.6946	22.4485	22.8137	22.793	22.6934	22.312	22.5999	2.9551	70612000	11	2	1	1	1	1	0	1	2	0	2	16.7	20.589
KRR1	KRR1 small subunit processome component homolog	Q13601;Q13601-2;A0A087WZC7	Q13601;Q13601-2;A0A087WZC7	NaN	22.7243	22.7531	21.8113	22.4438	21.6188	21.4159	21.8027	21.8293	22.7159	6.7732	44686000	12	1	2	2	1	2	0	1	1	0	2	6.3	43.664
SPTAN1	Spectrin alpha chain, non-erythrocytic 1	Q13813-3;Q13813;A0A0D9SF54;A0A0D9SGF6;Q13813-2;A0A0D9SFF6;A0A0D9SFH4	Q13813-3;Q13813;A0A0D9SF54;A0A0D9SGF6;Q13813-2	26.5932	26.613	27.0859	26.9017	26.6424	26.1344	25.7997	26.4056	26.5051	26.9222	103.15	971470000	122	12	13	24	13	12	8	5	10	9	16	19.1	282.28
CKAP5	Cytoskeleton-associated protein 5	Q14008-2;Q14008;Q14008-3;E9PQH5;H0YCF6;H0YEK7;H0YDX5	Q14008-2;Q14008;Q14008-3	23.9366	23.3679	23.7297	23.9052	23.9768	23.9096	23.9618	23.9882	23.8637	24.0572	19.759	145670000	32	2	2	4	3	4	3	3	2	2	7	6.7	218.52
HNRNPD	Heterogeneous nuclear ribonucleoprotein D0	Q14103-3;Q14103;H0YA96;H0Y8G5;Q14103-4;Q14103-2;D6RAF8;D6RF44;D6RD83;D6RBQ9	Q14103-3;Q14103;H0YA96;H0Y8G5;Q14103-4;Q14103-2;D6RAF8;D6RF44;D6RD83;D6RBQ9	29.3923	28.9956	28.9518	29.1761	29.3403	29.2055	30.0212	29.8544	29.6202	29.2978	42.076	8552700000	65	5	7	5	5	6	6	6	10	5	5	27.5	32.834
DYNC1H1	Cytoplasmic dynein 1 heavy chain 1	Q14204;H0YJ21	Q14204	26.1711	25.904	26.1298	25.8316	26.1177	25.517	25.635	26.3361	25.8362	26.2238	56.4	723730000	107	11	9	15	12	11	3	3	16	7	15	7.4	532.4
MCM6	DNA replication licensing factor MCM6	Q14566	Q14566	24.5072	25.0266	24.8875	24.9803	24.6969	24.6035	24.6336	24.9121	24.5637	24.8766	32.838	277630000	53	7	6	6	6	5	4	3	5	4	7	16.1	92.888
MDC1	Mediator of DNA damage checkpoint protein 1	Q14676-2;Q14676;Q14676-3;Q14676-4;A2AB05	Q14676-2;Q14676;Q14676-3	23.0001	23.4289	23.3823	23.5981	23.4783	23.6931	23.5679	23.5829	24.0486	23.5534	12.408	108000000	20	1	0	4	2	3	1	0	2	2	5	5	197.6
SMC1A	Structural maintenance of chromosomes protein 1A;Structural maintenance of chromosomes protein	Q14683;G8JLG1;H0Y7K8;V9GY57;V9GYN9	Q14683;G8JLG1	27.9842	27.9664	28.0716	28.0835	27.7288	27.9832	27.9615	28.082	28.6669	28.4521	162.28	2725000000	165	19	21	17	20	14	12	8	18	16	20	27.1	143.23
RRP1B	Ribosomal RNA processing protein 1 homolog B	Q14684;Q14684-2	Q14684;Q14684-2	24.2167	24.1537	23.4599	24.2196	23.9589	23.9896	24.1908	23.5498	24.735	23.991	13.371	164950000	27	3	3	3	3	2	2	3	4	2	2	11.7	84.427
PDCD11	Protein RRP5 homolog	Q14690	Q14690	22.8171	22.6866	23.1237	22.6304	22.3333	22.2148	22.2208	22.3201	22.3135	22.4335	7.7541	58316000	8	2	1	2	1	1	0	0	0	0	1	3.5	208.7
LBR	Lamin-B receptor	Q14739;C9JXK0;C9JES9	Q14739;C9JXK0	27.4762	27.2984	27.3791	26.9672	27.0024	26.7636	27.509	27.1074	27.4675	26.6842	25.975	1373200000	56	5	6	7	4	5	4	5	9	5	6	15.8	70.702
KPNB1	Importin subunit beta-1	Q14974;J3QR48;J3KTM9;Q14974-2	Q14974;J3QR48;J3KTM9;Q14974-2	23.0514	23.1429	23.3083	23.0436	23.1893	23.6305	23.5465	23.3483	23.9335	22.9678	12.955	96157000	21	1	3	3	1	2	2	2	2	3	1	5	97.169
NUMA1	Nuclear mitotic apparatus protein 1	Q14980-2;A0A087WY61;Q14980;Q14980-4;Q14980-3;F5H4J1;H0YFY6;Q14980-5;F5H6Y5;K4DIE0;F5H1L0;F5GZW1;F5H2F3;F5H3L6;F5H0Z7;F5H763	Q14980-2;A0A087WY61;Q14980;Q14980-4;Q14980-3	25.3187	25.3978	25.2638	25.095	25.2943	25.3994	25.3403	25.4192	25.8951	25.8743	68.926	420040000	66	8	9	8	6	5	3	3	7	5	12	14.5	236.51
EFTUD2	116 kDa U5 small nuclear ribonucleoprotein component	Q15029-2;Q15029-3;Q15029;K7EP67;K7EJ74	Q15029-2;Q15029-3;Q15029	26.0795	26.4306	25.9265	26.1923	26.1436	26.184	25.9455	25.6473	26.2124	26.0892	26.548	688190000	70	8	9	7	6	8	5	7	7	4	9	16.3	105.38
WDR43	WD repeat-containing protein 43	Q15061;C9JEE7	Q15061	24.1404	23.7645	23.9456	24.0142	23.642	23.8407	23.8188	23.9212	24.4496	23.5909	6.7951	148510000	19	2	0	2	3	2	1	1	3	3	2	6.4	74.89
NONO	Non-POU domain-containing octamer-binding protein	Q15233-2;Q15233;H7C367;C9JYS8;C9IZL7;C9J4X2	Q15233-2;Q15233;H7C367;C9JYS8	25.7434	25.6663	26.5764	25.9121	25.4413	25.1361	25.2595	25.5324	25.6335	25.6633	39.912	683500000	55	5	5	9	10	3	3	2	7	3	7	40.8	43.866
PCBP1	Poly(rC)-binding protein 1	Q15365	Q15365	27.0992	26.7537	26.8311	26.7242	26.9575	27.084	27.0707	26.8355	27.4602	26.8094	77.145	1264300000	75	5	8	7	7	9	7	5	6	8	7	37.4	37.497
SF3B3	Splicing factor 3B subunit 3	Q15393;Q15393-3;Q15393-2;J3QRB2;J3QL37;I3L4G7	Q15393	26.6458	26.8061	27.2725	26.6851	26.6676	26.7024	26.7007	26.4121	26.5831	26.7953	79.471	1064500000	97	10	10	15	10	8	6	7	9	7	14	21.6	135.58
SAFB	Scaffold attachment factor B1	Q15424-2;Q15424;Q15424-4;Q15424-3;K7ES42;K7EII0	Q15424-2;Q15424;Q15424-4;Q15424-3	25.3237	25.1271	24.8336	24.8907	25.1818	24.9598	24.922	24.9575	24.9966	25.0672	24.89	328830000	40	4	6	4	2	5	3	3	5	3	5	17.7	95.18
SF3A2	Splicing factor 3A subunit 2	Q15428;K7EMT0	Q15428;K7EMT0	22.695	22.7187	22.253	NaN	23.2503	23.2039	NaN	22.5805	22.9329	22.6144	2.8271	69323000	8	0	2	1	0	1	1	0	1	1	1	10.8	49.255
SF3A1	Splicing factor 3A subunit 1	Q15459;Q15459-2;F8WC79;F8WB66	Q15459;Q15459-2	25.9752	25.9992	26.2688	26.1435	26.0022	26.1594	26.1146	25.9494	26.4086	26.0158	42.009	667450000	71	6	8	9	8	7	6	5	8	5	9	17.7	88.885
SF1	Splicing factor 1	Q15637-4;Q15637-6;Q15637-3;Q15637-2;Q15637;Q15637-5;Q15637-7;F8WEV5;H7C561	Q15637-4;Q15637-6;Q15637-3;Q15637-2;Q15637;Q15637-5;Q15637-7	23.8981	24.0056	24.1047	24.7322	24.3914	25.1656	24.8013	24.6741	24.5009	24.099	16.347	214980000	28	2	2	4	5	3	3	1	2	1	3	13.1	59.711
ELAVL1	ELAV-like protein 1	Q15717;Q15717-2;M0QZR9;M0R055;B1AM48;B1APY9;B1APY8;A0A0A0MRX1;A0A0R4J2E6;Q12926-2;Q12926;P26378-4;P26378-2;P26378-5;P26378;P26378-3	Q15717;Q15717-2;M0QZR9	25.0969	25.4861	25.6578	25.4506	25.705	25.6865	25.884	25.5075	25.8473	25.5428	32.892	474680000	54	0	6	8	6	4	3	7	5	5	8	30.4	36.091
DDB1	DNA damage-binding protein 1	Q16531;F5GY55;F5H2L3;Q16531-2;F5GYG8;F5GWI0;F5GZY8	Q16531;F5GY55	NaN	23.6514	23.843	23.6163	23.7964	23.788	23.7089	23.8114	24.3582	23.5225	7.3361	122000000	16	1	1	3	2	2	0	1	3	2	1	5.7	126.97
IFI16	Gamma-interferon-inducible protein 16	Q16666-3;Q16666-2;Q16666;Q16666-6;H3BM18;X6RHM1;H3BVE6;X6RHR0;Q6K0P9-6;Q6K0P9-5;Q6K0P9-4;Q6K0P9-3;Q6K0P9-2;Q6K0P9;H3BR88;A0A0A0MRB1	Q16666-3;Q16666-2;Q16666;Q16666-6;H3BM18;X6RHM1	24.9253	24.8146	25.0317	24.8533	24.8384	25.0088	24.915	24.6619	24.6248	24.4119	24.908	276750000	38	4	4	6	4	4	3	2	5	3	3	11.7	75.935
HNRNPUL2;HNRNPUL2-BSCL2	Heterogeneous nuclear ribonucleoprotein U-like protein 2	Q1KMD3;H3BQZ7	Q1KMD3;H3BQZ7	26.7273	26.3184	26.7044	26.1923	26.0501	25.8737	26.2408	25.8667	26.0353	26.1195	77.752	735080000	83	9	6	9	10	10	6	9	6	7	11	22.4	85.104
PDS5A	Sister chromatid cohesion protein PDS5 homolog A	Q29RF7;Q29RF7-3;H0Y9L6;Q9NTI5-2;Q9NTI5;H0Y9L9	Q29RF7	25.7275	25.6567	25.7574	25.3926	25.3606	25.3668	25.3679	25.4201	26.0315	25.8011	68.922	490060000	66	9	8	9	4	8	7	3	4	4	10	15.3	150.83
SMU1	WD40 repeat-containing protein SMU1;WD40 repeat-containing protein SMU1, N-terminally processed	Q2TAY7;Q2TAY7-2	Q2TAY7;Q2TAY7-2	23.9611	24.1596	24.1506	24.2468	23.6622	24.0253	23.8702	23.4906	24.1584	23.7899	29.008	149730000	27	4	5	5	3	4	2	0	2	1	1	13.5	57.543
HSD17B12	Very-long-chain 3-oxoacyl-CoA reductase	Q53GQ0;E9PI21;Q53GQ0-2	Q53GQ0;E9PI21	23.5082	22.9562	23.6688	22.6698	22.7008	21.9758	23.0002	22.7562	23.0477	22.6099	6.6943	80385000	17	2	2	4	1	1	0	1	2	3	1	13.1	34.324
GLE1	Nucleoporin GLE1	Q53GS7-2;Q53GS7	Q53GS7-2;Q53GS7	NaN	22.8767	22.984	23.0908	23.0312	22.8669	23.026	22.8783	23.1335	22.728	3.1234	69075000	14	1	1	3	2	2	1	1	1	1	1	8.3	75.406
ZNF326	DBIRD complex subunit ZNF326	Q5BKZ1;A0A0A0MRN4;Q5BKZ1-3;E2QRN4;Q5BKZ1-2	Q5BKZ1	24.7652	25.2451	25.3164	25.5897	24.8226	24.9776	23.901	25.1086	24.6034	24.9496	22.137	298730000	30	2	2	5	5	3	2	2	3	3	3	14.3	65.653
DNTTIP2	Deoxynucleotidyltransferase terminal-interacting protein 2	Q5QJE6;J3KP30;E9PRB3	Q5QJE6;J3KP30	23.8213	23.5839	23.0208	24.1138	23.7393	24.377	23.8475	23.668	24.2146	23.7307	9.3288	139450000	28	2	3	3	3	2	4	2	4	2	3	9.1	84.468
RALY	RNA-binding protein Raly	Q5QPL9;Q9UKM9-2;Q9UKM9;Q5QPM1;Q5QPM0;Q5QPM2	Q5QPL9;Q9UKM9-2;Q9UKM9;Q5QPM1;Q5QPM0;Q5QPM2	27.4939	27.4317	27.4947	27.5214	27.0699	27.3392	27.335	27.2044	27.8104	27.3189	38.141	1620200000	96	11	8	9	11	11	9	7	12	9	8	51.1	24.665
NUP188	Nucleoporin NUP188 homolog	Q5SRE5;Q5SRE5-2;H7C4K7	Q5SRE5;Q5SRE5-2	24.589	24.7426	24.3444	24.6491	24.1815	23.9712	24.5683	24.1569	24.6282	24.3651	14.8	240240000	30	5	5	3	4	1	2	2	2	3	3	5.8	196.04
HP1BP3	Heterochromatin protein 1-binding protein 3	Q5SSJ5;X6RGJ2;Q5SSJ5-3;Q5SSJ5-2;B0QZK4;Q5SWC8;B0QZK9;B0QZK8;Q5SSJ5-5	Q5SSJ5;X6RGJ2;Q5SSJ5-3;Q5SSJ5-2;B0QZK4;Q5SWC8	25.702	25.7712	25.613	25.6758	25.332	25.7284	25.7733	25.5206	25.9187	25.7678	33.005	515030000	55	6	7	7	8	5	3	4	5	4	6	19.5	61.206
HEATR1	HEAT repeat-containing protein 1;HEAT repeat-containing protein 1, N-terminally processed	Q9H583;Q5T3Q7;Q6P664	Q9H583;Q5T3Q7	24.9488	24.9052	25.158	25.069	24.8366	24.7622	25.056	24.3836	25.2717	24.6671	28.847	300380000	49	4	6	6	4	4	3	5	4	7	6	6.9	242.37
RIF1	Telomere-associated protein RIF1	Q5UIP0-2;Q5UIP0;H7C2B5;H7BZN3	Q5UIP0-2;Q5UIP0;H7C2B5	24.2133	24.5086	24.7542	24.1799	24.5022	23.9215	24.1578	23.8628	24.4031	24.67	37.86	194940000	41	3	6	8	4	4	2	1	2	3	8	8.1	271.69
PRPF8	Pre-mRNA-processing-splicing factor 8	Q6P2Q9;I3L0J9;I3L1T8;I3L3Z8	Q6P2Q9	26.1255	25.7851	25.8883	26.2731	25.8363	25.7196	25.6105	25.5759	25.3186	25.7845	39.779	554290000	95	9	10	12	10	11	9	7	9	7	11	10.8	273.6
ATAD2	ATPase family AAA domain-containing protein 2	Q6PL18;A0A0B4J211;Q6PL18-2;Q9ULI0-2;Q9ULI0	Q6PL18	24.4089	24.3745	24.4948	24.1668	24.3038	24.071	24.223	24.4601	24.9904	24.9496	51.07	329060000	52	3	8	5	5	4	4	2	3	4	5	13	158.55
FIP1L1	Pre-mRNA 3-end-processing factor FIP1	Q6UN15-4;Q6UN15-5;Q6UN15;A0A0B4J203;Q6UN15-3	Q6UN15-4;Q6UN15-5;Q6UN15;A0A0B4J203;Q6UN15-3	25.3584	24.9396	25.3782	25.8779	25.619	25.2631	24.7258	25.3386	25.1063	25.6306	70.843	430280000	40	4	4	5	4	6	5	1	5	2	4	22.5	40.834
SUPT6H	Transcription elongation factor SPT6	Q7KZ85;Q7KZ85-2;Q7KZ85-3	Q7KZ85;Q7KZ85-2	24.3213	24.1665	24.7847	24.4325	24.1339	23.7744	24.0091	23.8458	24.0422	24.7944	14.378	192970000	17	1	1	2	3	3	0	1	1	1	4	5	199.07
SND1	Staphylococcal nuclease domain-containing protein 1	Q7KZF4	Q7KZF4	22.4877	22.8377	NaN	23.3691	22.6767	22.6398	22.6175	23.9867	23.0526	23.0175	6.4881	81143000	12	1	1	1	1	1	1	0	3	1	1	5.2	102
ZC3HAV1	Zinc finger CCCH-type antiviral protein 1	Q7Z2W4-2;Q7Z2W4;C9J6P4;Q7Z2W4-3	Q7Z2W4-2;Q7Z2W4;C9J6P4;Q7Z2W4-3	21.8912	22.1778	22.2464	22.1195	22.2954	22.4575	22.152	22.2855	22.5839	22.0909	11.057	44748000	11	0	0	3	2	2	0	0	0	1	3	6.9	77.902
NUP54	Nucleoporin p54	Q7Z3B4;Q7Z3B4-3;Q7Z3B4-2	Q7Z3B4;Q7Z3B4-3;Q7Z3B4-2	24.2914	24.2229	24.7817	23.6672	24.1862	23.1625	23.3868	23.9278	23.4524	24.713	35.849	165380000	20	4	3	3	2	2	0	0	2	1	3	15.8	55.435
MYH14	Myosin-14	Q7Z406;Q7Z406-6;Q7Z406-2;Q7Z406-5;Q7Z406-4;M0QY43	Q7Z406;Q7Z406-6;Q7Z406-2;Q7Z406-5;Q7Z406-4;M0QY43	25.5546	23.4778	25.9256	25.0102	25.3809	24.7805	24.1922	25.0687	25.0365	25.8157	2.49	395790000	20	2	1	3	2	2	2	1	2	2	2	5.2	227.87
YTHDF3	YTH domain-containing family protein 3	Q7Z739;A0A087X0Q1;A0A024R7W5;A0A087WY31;S4R373;A0A087X0C3	Q7Z739;A0A087X0Q1;A0A024R7W5;A0A087WY31	25.7838	25.8596	25.4846	26.0137	25.9966	26.6799	26.3641	26.0723	26.544	25.9695	63.318	663200000	56	6	6	5	6	6	4	4	5	5	6	21.5	63.86
ALYREF	THO complex subunit 4	Q86V81;E9PB61	Q86V81;E9PB61	NaN	22.3536	23.9514	19.992	22.2318	NaN	NaN	22.7651	21.5305	23.8858	5.5578	61810000	7	0	0	3	0	1	0	0	1	0	2	12.1	26.888
STAG2	Cohesin subunit SA-2	Q8N3U4;Q8N3U4-2;B1AMT4;B1AMT1;B1AMT2;B1AMT3;D6W5U7;Q9UJ98-2;Q9UJ98-3;Q9UJ98	Q8N3U4;Q8N3U4-2;B1AMT4	25.7223	25.8196	25.5042	25.3038	24.9506	24.8139	25.187	24.8875	25.2836	25.2728	28.319	384690000	59	8	8	6	5	4	3	5	7	6	7	9.6	141.32
CISD2	CDGSH iron-sulfur domain-containing protein 2	Q8N5K1;I3L1N9;D6RCF4	Q8N5K1;I3L1N9;D6RCF4	22.7867	23.2076	22.1006	22.2235	22.6169	21.658	22.5819	22.4581	21.8699	22.5726	6.3157	56667000	13	2	2	1	1	2	0	1	2	1	1	19.3	15.278
SERBP1	Plasminogen activator inhibitor 1 RNA-binding protein	Q8NC51-4;Q8NC51-3;Q8NC51-2;Q8NC51	Q8NC51-4;Q8NC51-3;Q8NC51-2;Q8NC51	20.6853	21.1584	20.3062	21.2504	21.4566	22.8062	21.3975	21.1413	21.9143	22.3475	12.862	28646000	8	0	1	0	0	1	2	0	1	0	2	7.5	42.426
LEMD2	LEM domain-containing protein 2	Q8NC56;H7C2Z0;D6R958;D6RBV0;Q8NC56-2	Q8NC56;H7C2Z0	23.4064	23.7219	23.3685	22.9596	23.0737	23.5036	23.3079	22.6788	23.4953	23.1658	10.847	96946000	16	2	2	4	1	2	1	2	1	1	0	11.7	56.974
NUP43	Nucleoporin Nup43	Q8NFH3;Q8NFH3-2;B4E301;F5H0E3;B4DVD1	Q8NFH3	25.0444	25.2254	25.5183	24.6033	24.8996	24.5168	24.5339	24.131	24.4124	25.2193	20.485	287980000	28	2	3	4	3	3	3	2	3	2	3	16.8	42.15
NUP37	Nucleoporin Nup37	Q8NFH4;F8VTY2	Q8NFH4;F8VTY2	24.16	24.2701	24.0358	24.054	24.0064	24.1995	23.8602	23.6322	24.2714	23.5219	8.4779	153760000	17	1	2	4	3	0	1	2	1	1	2	16.3	36.707
NUP35	Nucleoporin NUP53	Q8NFH5-2;Q8NFH5;C9IYQ7;F8WCF5;F8WEL4;Q8NFH5-3;C9JIY9;C9JWU7	Q8NFH5-2;Q8NFH5;C9IYQ7;F8WCF5;F8WEL4;Q8NFH5-3	26.3358	26.2277	26.2272	25.6143	25.9737	25.8694	26.1887	25.9397	26.1989	25.9786	55.035	636510000	37	3	4	3	4	5	3	4	3	4	4	29.1	33.12
UTP15	U3 small nucleolar RNA-associated protein 15 homolog	Q8TED0-3;Q8TED0;H0Y8P4;Q8TED0-2;D6RF65;REV__Q8TED0-2;REV__Q8TED0-3;REV__Q8TED0;REV__H0Y8P4	Q8TED0-3;Q8TED0;H0Y8P4;Q8TED0-2	22.563	23.3112	23.4468	22.7018	22.8509	NaN	22.9374	22.7323	23.5648	23.0394	8.6253	76531000	17	2	2	3	1	2	1	1	0	3	2	14.4	56.355
NUP210	Nuclear pore membrane glycoprotein 210	Q8TEM1;Q8TEM1-2	Q8TEM1	25.3848	25.3936	25.6033	25.2798	25.1664	25.1164	25.5582	24.9209	25.5245	25.1118	31.846	401230000	70	9	8	9	9	5	4	6	8	6	6	8.4	205.11
NUP133	Nuclear pore complex protein Nup133	Q8WUM0	Q8WUM0	26.5693	26.5437	26.724	26.0346	26.3773	26.0311	25.9755	26.149	25.7944	26.502	58.068	781350000	84	9	9	11	9	10	6	5	7	4	14	18.9	128.98
PHIP	PH-interacting protein	Q8WWQ0	Q8WWQ0	24.0056	24.0968	24.3394	24.0929	24.2944	24.1049	24.3166	24.0909	24.603	24.2436	21.748	187830000	32	2	3	4	3	4	1	3	5	3	4	4.9	206.69
MYLIP	E3 ubiquitin-protein ligase MYLIP	Q8WY64;Q5TIA5;Q8WY64-2	Q8WY64	23.3983	26.198	23.0658	24.8028	25.0301	24.69	23.3273	26.9457	23.952	25.8275	40.536	593360000	40	1	5	0	5	4	3	0	6	2	5	12.8	49.91
AHCTF1	Protein ELYS	Q8WYP5;Q8WYP5-3;Q8WYP5-2	Q8WYP5;Q8WYP5-3;Q8WYP5-2	24.4543	24.0272	24.487	24.2549	24.3995	24.2287	24.4594	24.2689	24.3982	24.4666	23.891	230230000	44	4	3	7	3	7	4	2	4	4	6	6.2	252.5
H1FX	Histone H1x	Q92522	Q92522	23.5885	24.0012	23.8198	23.8125	23.8698	24.1216	23.626	24.1896	23.4016	23.7176	17.331	142510000	26	2	3	3	3	3	2	2	4	1	3	25.8	22.487
GCN1L1	Translational activator GCN1	Q92616	Q92616	25.502	25.3616	25.909	25.5071	25.5454	25.0958	25.3292	25.2082	25.6132	25.1258	41.69	419260000	68	9	9	11	6	7	4	3	8	4	7	9	292.75
NUP205	Nuclear pore complex protein Nup205	Q92621;U3KPX2	Q92621	26.1202	26.0141	26.5723	26.3209	26.1662	25.6913	26.1362	26.2085	25.5447	25.8028	53.861	660010000	62	9	8	7	6	5	4	5	9	1	8	10	227.92
EMG1	Ribosomal RNA small subunit methyltransferase NEP1	Q92979;A0A087WVM7;V9GYP5;A0A087WWQ2	Q92979;A0A087WVM7;V9GYP5;A0A087WWQ2	23.3539	23.5742	23.205	NaN	23.3385	23.6015	23.5573	23.2557	23.438	23.4717	8.6999	93217000	12	2	3	1	2	1	1	1	0	0	1	21.3	26.72
LRRC59	Leucine-rich repeat-containing protein 59	Q96AG4;I3L223	Q96AG4	25.1186	25.5916	25.8513	25.1793	25.5843	25.5219	25.6815	25.2817	26.0034	25.2524	32.59	443380000	34	1	4	6	2	3	3	4	3	4	4	23.5	34.93
FUBP3	Far upstream element-binding protein 3	Q96I24;Q96I24-2	Q96I24	24.6183	24.5009	24.7636	24.593	24.4983	24.6328	24.8531	24.4909	24.8037	24.4489	23.104	247630000	38	4	4	4	4	3	2	3	5	4	4	12.6	61.64
RBM17	Splicing factor 45	Q96I25;Q5W011;Q5W010;Q5W012;H0Y6J6	Q96I25	25.3328	25.3109	25.8852	25.2443	25.6389	25.1103	25.5136	24.8105	25.4902	25.4172	22.951	426310000	40	4	5	6	4	5	3	2	5	1	5	20	44.961
USMG5	Up-regulated during skeletal muscle growth protein 5	Q96IX5	Q96IX5	23.1946	NaN	23.6807	22.5627	22.8396	22.5595	NaN	22.7637	22.7475	23.0526	11.708	76107000	10	2	0	2	0	1	1	1	1	0	2	43.1	6.4575
SERPINB12	Serpin B12	Q96P63;Q96P63-2	Q96P63;Q96P63-2	25.1036	24.2633	24.3678	24.8802	25.3213	25.026	25.1543	23.9946	24.1167	23.9667	30.067	295420000	34	3	2	3	4	3	2	3	3	1	3	19.8	46.276
RBM14	RNA-binding protein 14	Q96PK6;Q96PK6-2;A0A0A6YYI9;F8WDX3;A0A0A0MSL8;B8ZZ74;Q96PK6-3;Q96PK6-4	Q96PK6	26.7428	26.3883	26.6029	26.5373	26.5259	26.6645	26.8566	26.6464	26.9808	26.5079	51.267	984950000	81	9	9	8	6	8	8	9	7	6	7	22.9	69.491
TMEM209	Transmembrane protein 209	Q96SK2-2;Q96SK2;Q96SK2-3;C9JYX1;Q96SK2-4;C9J5K4	Q96SK2-2;Q96SK2;Q96SK2-3	24.3941	24.1849	24.5258	24.2942	24.0604	23.9794	24.2986	23.7681	24.0124	23.6728	13.186	189990000	31	3	5	6	4	3	1	3	3	0	3	28.4	62.79
CDC5L	Cell division cycle 5-like protein	Q99459	Q99459	23.2895	23.099	22.8337	22.8312	22.3927	22.4357	22.5232	23.1381	22.763	22.8877	11.764	71938000	20	3	1	3	1	2	1	0	5	1	3	10.7	92.25
PHB2	Prohibitin-2	Q99623;F5GY37;J3KPX7;F5GWA7;Q99623-2;F5H3X6;F5H2D2;U3KPZ5;F5H0C5	Q99623;F5GY37;J3KPX7;F5GWA7;Q99623-2	25.9557	25.8626	26.0646	25.7469	25.6652	25.4818	26.1404	26.0649	25.8151	25.7039	37.721	572250000	43	5	4	5	4	4	4	2	5	5	5	34.1	33.296
VRK1	Serine/threonine-protein kinase VRK1	Q99986;H0YJ50;H0YJJ9	Q99986;H0YJ50	22.4817	23.0287	22.4431	23.0159	23.0811	23.0168	23.3385	22.8099	23.1195	23.1363	5.9639	77767000	19	1	2	1	3	2	1	2	3	0	4	9.6	45.476
NDC1	Nucleoporin NDC1	Q9BTX1-6;Q9BTX1-5;Q9BTX1-2;Q9BTX1;Q9BTX1-4;Q9BTX1-3	Q9BTX1-6;Q9BTX1-5;Q9BTX1-2;Q9BTX1;Q9BTX1-4	24.0817	24.2587	24.4176	23.9732	24.1642	23.1483	23.8848	23.4748	24.2762	23.5519	11.688	154160000	18	2	2	4	1	1	1	2	0	3	2	9.8	63.157
NUP85	Nuclear pore complex protein Nup85	Q9BW27;Q9BW27-3;J3KT10;J3QL54;Q9BW27-2;J3KRC0;J3QLV0;J3QLD4;J3KSH3;F5H0W7;J3KS87;J3QL91;J3QLH0	Q9BW27;Q9BW27-3;J3KT10;J3QL54;Q9BW27-2	25.3467	25.5216	25.7072	25.2541	25.1236	22.7912	24.0696	24.9125	24.9797	25.3879	21.633	356420000	27	4	4	5	3	2	1	2	1	3	2	13.6	75.019
RBM4;RBM4B	RNA-binding protein 4;RNA-binding protein 4B	Q9BWF3;E9PB51;Q9BQ04;Q9BWF3-4;E9PLB0;E9PM61;D6R9K7;U3KQD5;J3QRR5;Q9BWF3-3;Q9BWF3-2	Q9BWF3;E9PB51;Q9BQ04;Q9BWF3-4	25.5821	25.6375	25.785	25.4753	25.1108	25.6667	25.3656	25.5289	25.7035	25.1469	41.76	496060000	50	2	7	5	5	5	4	3	5	5	7	29.7	40.313
POLDIP3	Polymerase delta-interacting protein 3	Q9BY77;F6VRR5;F8WCX5;Q9BY77-2;Q8WUT1;Q6R954;F8WEE2	Q9BY77;F6VRR5;F8WCX5;Q9BY77-2	24.6635	24.6346	24.475	24.9892	25.0205	25.4227	24.8062	24.6601	25.0588	24.9654	58.534	299510000	30	3	5	5	3	3	2	1	1	3	4	23.3	46.089
YTHDF1	YTH domain-containing family protein 1	Q9BYJ9;Q9BYJ9-2	Q9BYJ9	24.9958	24.7744	24.5309	24.1922	24.713	24.4233	24.7699	23.9362	24.1469	24.6441	19.007	240960000	24	5	3	1	3	3	1	1	2	1	4	24.7	60.873
GTPBP4	Nucleolar GTP-binding protein 1	Q9BZE4-2;Q9BZE4;Q5T3R7;Q9BZE4-3	Q9BZE4-2;Q9BZE4;Q5T3R7;Q9BZE4-3	22.9275	24.0905	23.7616	24.1017	23.5496	23.6982	23.6347	24.0623	24.3884	23.8576	12.803	142880000	27	1	6	4	3	1	1	0	5	2	4	15.2	68.272
WDR33	pre-mRNA 3 end processing protein WDR33	Q9C0J8;Q9C0J8-3;C9J8B4;B9A053;Q9C0J8-2	Q9C0J8	24.538	24.4379	24.5195	24.3171	24.2922	23.7314	23.8705	23.7627	23.7696	24.6447	13.731	187240000	24	5	5	3	1	2	1	1	2	1	3	5.7	145.89
BCL11B	B-cell lymphoma/leukemia 11B	Q9C0K0-2;Q9C0K0;D3YTK1;Q9H165-6;Q9H165	Q9C0K0-2;Q9C0K0;D3YTK1	24.4524	24.405	24.3409	24.5393	24.3394	24.4677	24.1164	23.615	23.8899	24.414	20.275	191740000	39	6	7	4	5	5	2	2	3	1	4	12.9	88.475
NAT10	N-acetyltransferase 10	Q9H0A0;A0A087WV29;Q9H0A0-2;E9PMU0;E9PJN6	Q9H0A0;A0A087WV29;Q9H0A0-2	22.5211	24.106	23.58	23.6074	23.7651	23.1024	23.7961	24.1942	24.4296	23.4959	11.709	135820000	25	1	5	3	1	2	1	3	4	2	3	7.5	115.73
XRN2	5-3 exoribonuclease 2	Q9H0D6-2;Q9H0D6	Q9H0D6-2;Q9H0D6	22.6222	22.6845	22.3297	22.6799	23.0755	23.4153	NaN	23.2914	22.8921	23.3473	5.2725	72850000	17	2	1	4	2	1	1	1	2	1	1	7.9	99.96
PNN	Pinin	Q9H307;G3V5F0;G3V579;Q9H307-2	Q9H307;G3V5F0;G3V579	NaN	23.3052	23.0108	NaN	23.1032	23.8734	23.6535	22.9548	23.8335	23.5473	6.5348	103590000	9	0	2	1	0	1	1	0	2	0	2	6.7	81.613
UNC45A	Protein unc-45 homolog A	Q9H3U1-2;Q9H3U1	Q9H3U1-2;Q9H3U1	NaN	22.2851	22.6893	22.7252	23.0091	NaN	22.0588	22.342	22.3549	23.1429	8.7365	58360000	12	1	2	3	1	3	0	0	0	0	2	6.2	101.67
NOL11	Nucleolar protein 11	Q9H8H0;J3QLQ6;J3QR28;Q9H8H0-2	Q9H8H0;J3QLQ6;J3QR28	23.4475	23.5891	23.7646	23.3861	23.4832	23.1384	23.3809	22.8495	23.7453	23.4358	13.586	102380000	26	3	4	5	2	3	0	2	2	3	2	9.7	81.123
NCOA5	Nuclear receptor coactivator 5	Q9HCD5;Q5JY17	Q9HCD5	NaN	23.7589	23.6753	24.0916	23.9979	24.1471	23.8193	24.1655	24.4238	23.568	7.3648	134560000	19	1	2	2	1	1	2	2	3	2	3	10.9	65.536
DDX21	Nucleolar RNA helicase 2	Q9NR30;Q9NR30-2	Q9NR30;Q9NR30-2	26.5572	26.2966	26.1893	26.0186	25.9866	26.0754	26.2922	26.3709	26.7851	26.5413	77.062	765380000	74	12	9	5	5	6	5	5	9	7	11	25.3	87.343
DDX18	ATP-dependent RNA helicase DDX18	Q9NVP1;H7C452	Q9NVP1	24.5557	24.9345	24.2791	24.5357	24.6797	24.4314	24.6806	24.4548	25.0911	24.4225	19.363	251150000	31	5	5	7	3	3	0	2	2	1	3	15.8	75.406
RCC2	Protein RCC2	Q9P258	Q9P258	24.4506	24.6538	24.622	24.4677	24.5578	24.3521	24.6664	24.4739	24.6619	24.6186	18.457	238340000	33	2	4	5	3	4	2	3	3	2	4	13.6	56.084
CPSF2	Cleavage and polyadenylation specificity factor subunit 2	Q9P2I0;H0YJF4	Q9P2I0	25.1127	24.7661	24.8913	24.7575	24.4085	24.3354	24.1979	24.1138	24.3496	24.5088	16.082	258650000	33	3	5	6	2	2	3	2	3	3	4	15.2	88.486
NXF1	Nuclear RNA export factor 1	Q9UBU9;E9PIN3;Q9UBU9-2;B4E227;E9PQA4;E9PLA7;H0YDU0	Q9UBU9;E9PIN3;Q9UBU9-2;B4E227	25.4537	25.3492	25.6353	25.0412	25.0126	24.8349	25.1489	24.6391	24.9968	24.9818	26.99	372860000	46	4	6	7	5	5	2	4	4	3	6	17.9	70.182
BAZ1B	Tyrosine-protein kinase BAZ1B	Q9UIG0-2;Q9UIG0	Q9UIG0-2;Q9UIG0	24.2864	24.0872	22.764	24.2221	23.7875	24.2207	24.4552	23.5931	24.5727	23.9375	12.741	163290000	30	3	4	3	3	3	3	3	2	3	3	7.3	170.45
NUP50	Nuclear pore complex protein Nup50	Q9UKX7;Q9UKX7-2;B0QY21	Q9UKX7;Q9UKX7-2	22.9947	23.2967	23.9487	22.8082	23.414	22.9409	23.4495	23.1971	23.441	23.7145	10.361	100860000	14	1	1	5	1	1	1	1	0	1	2	15.2	50.144
TPX2	Targeting protein for Xklp2	Q9ULW0;Q9ULW0-2	Q9ULW0;Q9ULW0-2	23.218	NaN	22.6231	23.1152	22.9462	23.0733	23.2245	NaN	23.3561	22.6513	6.2531	69292000	12	1	2	3	1	1	1	0	0	1	2	7	85.652
PRPF19	Pre-mRNA-processing factor 19	Q9UMS4;F5GY56;H0YGF3;F5H2I0;H0YGZ5	Q9UMS4	25.4621	24.7394	25.1016	25.2581	24.717	25.3295	25.2201	24.9018	25.122	25.3127	20.199	358580000	33	5	3	2	2	2	2	4	4	3	6	16.5	55.18
SMC3	Structural maintenance of chromosomes protein 3	Q9UQE7	Q9UQE7	27.6806	27.8178	27.9239	28.1369	27.572	28.0968	27.688	27.8217	28.3812	28.3657	203.83	2503200000	198	18	23	23	22	17	16	14	24	15	26	29.3	141.54
C14orf166	UPF0568 protein C14orf166	Q9Y224;H0YJB9;G3V4C6	Q9Y224;H0YJB9;G3V4C6	22.6041	23.1047	23.6343	23.3042	23.478	23.1949	23.0677	23.2974	23.6165	23.2183	6.2574	93768000	18	1	1	2	2	2	1	1	2	3	3	13.5	28.068
RUVBL2	RuvB-like 2	Q9Y230;Q9Y230-2;X6R2L4;M0R0Y3;M0R0Z0;M0QXI6;M0QXZ7	Q9Y230;Q9Y230-2;X6R2L4;M0R0Y3	24.3294	24.1377	24.3114	24.2978	24.3099	24.514	24.393	25.1057	24.2107	25.1968	20.498	205290000	28	1	5	4	1	2	2	3	4	2	3	22.9	51.156
RUVBL1	RuvB-like 1	Q9Y265-2;Q9Y265;E7ETR0;J3QLR1;H7C4G5	Q9Y265-2;Q9Y265;E7ETR0	23.4456	23.7955	23.7978	23.494	23.6634	23.8035	23.6998	24.2651	24.2226	23.9818	8.7296	148220000	24	2	2	2	1	2	2	2	3	3	3	14.8	42.126
THRAP3	Thyroid hormone receptor-associated protein 3	Q9Y2W1;H0YF14	Q9Y2W1	24.4534	25.0263	24.4049	25.2259	24.8753	25.3106	25.2876	25.2688	25.4333	24.8647	15.6	341400000	36	3	6	2	4	1	2	4	5	3	6	9.1	108.66
NOP58	Nucleolar protein 58	Q9Y2X3;H7BZ72;F8WED0	Q9Y2X3	26.0899	26.1698	26.1333	26.0282	26.0386	25.722	25.7389	26.2064	25.7071	25.9953	32.566	631740000	57	6	8	7	7	7	4	4	5	3	6	21.4	59.578
LUC7L2;C7orf55-LUC7L2	Putative RNA-binding protein Luc7-like 2	Q9Y383;A0A0A6YYC3;Q96HJ9-2;A0A0A6YYJ8;Q9Y383-3;Q9Y383-2;A8MYV2;Q9NQ29-2;Q9NQ29-3;Q9NQ29;B8ZZ12;V9GZ75;F8WEU3;B8ZZ10	Q9Y383;A0A0A6YYC3;Q96HJ9-2;A0A0A6YYJ8;Q9Y383-3;Q9Y383-2	23.8158	23.2621	23.7128	NaN	23.3629	23.2476	23.3026	23.5886	23.7866	22.9213	10.426	112180000	23	2	1	2	1	2	2	1	3	3	3	15.6	46.513
RTCB	tRNA-splicing ligase RtcB homolog	Q9Y3I0	Q9Y3I0	23.9545	23.795	24.1558	24.3136	23.8266	23.8172	23.5347	24.4185	24.0149	23.7423	10.782	162520000	23	2	3	3	4	3	1	1	3	1	2	10.7	55.21
NOC2L	Nucleolar complex protein 2 homolog	Q9Y3T9	Q9Y3T9	24.6965	24.898	25.1327	24.7814	24.6317	24.6448	24.7059	24.3342	24.8091	24.8123	18.999	275630000	40	5	5	5	4	5	3	3	3	2	5	7.7	84.918
CHTOP	Chromatin target of PRMT1 protein	X6R700;Q9Y3Y2-4;Q9Y3Y2;Q9Y3Y2-3;A0A087X1B7	X6R700;Q9Y3Y2-4;Q9Y3Y2;Q9Y3Y2-3;A0A087X1B7	22.6749	22.8992	22.4159	22.67	22.2625	22.441	22.8821	22.8603	23.0661	22.6771	4.3264	70809000	13	1	3	0	0	0	0	2	3	2	2	11.7	23.661
SUPT16H	FACT complex subunit SPT16	Q9Y5B9;G3V5A4;G3V401;G3V2X0	Q9Y5B9	27.6311	27.763	27.7723	27.2608	27.492	27.4263	27.6867	27.2567	27.4393	27.6401	126.24	1833300000	130	13	15	16	11	17	11	10	14	9	14	26.3	119.91
TIMM13	Mitochondrial import inner membrane translocase subunit Tim13	Q9Y5L4;K7EIT2	Q9Y5L4;K7EIT2	22.2638	23.0219	22.6349	22.3731	22.4894	21.5756	21.8994	21.3571	21.9279	22.4224	10.053	49343000	14	2	3	2	2	3	0	0	1	0	1	51.6	10.5
RBM8A	RNA-binding protein 8A	Q9Y5S9;A0A0J9YW13;Q9Y5S9-2	Q9Y5S9;A0A0J9YW13;Q9Y5S9-2	22.3245	22.2444	22.2431	21.8957	21.8735	NaN	NaN	23.1734	22.5623	22.6054	4.9131	49573000	13	1	2	1	1	1	1	0	2	2	2	11.5	19.889
MAD1L1	Mitotic spindle assembly checkpoint protein MAD1	Q9Y6D9;Q9Y6D9-3;C9JPS1;C9JP81;C9JIR0;C9JTA2;C9K086;C9JX80;C9JJ38;C9J9H5;C9JKI7	Q9Y6D9;Q9Y6D9-3	23.7387	24.405	24.7489	24.2293	24.3718	24.2106	24.0781	24.1737	24.5916	24.6835	32.499	201200000	45	2	5	4	4	4	3	3	6	4	10	22.7	83.066
DYNC1LI1	Cytoplasmic dynein 1 light intermediate chain 1	Q9Y6G9;E9PHI6	Q9Y6G9;E9PHI6	21.9549	22.6937	22.7558	22.846	23.1514	NaN	NaN	23.0269	23.022	23.117	11.476	63086000	11	0	2	0	1	2	1	0	3	1	1	7.3	56.578
ACIN1	Apoptotic chromatin condensation inducer in the nucleus	S4R3H4;E7EQT4;Q9UKV3-5;Q9UKV3;G3V3B0;Q9UKV3-3;Q9UKV3-2;G3V3T3	S4R3H4;E7EQT4;Q9UKV3-5;Q9UKV3;G3V3B0;Q9UKV3-3;Q9UKV3-2	22.4209	22.4788	22.574	23.1618	22.2949	22.5255	22.5425	22.5561	23.3923	22.4851	6.8854	60806000	14	1	3	2	2	0	0	0	1	3	2	5.5	145.44
